# Supplementary material for: Synthesis and biological evaluation of dihydropyrano-[2,3-c]pyrazoles as a new class of PPARγ partial agonists
Source: PubMed Central journal article supplement (PMC5330453; doi:10.1371/journal.pone.0162642), 2017-02-28
Supplement: pone.0162642.s001.pdf [file pone.0162642.s001.pdf]

# Supporting Information

## Synthesis and biological evaluation of dihydropyrano[2,3-c]-pyrazoles as a new class of PPAR $\gamma$ partial agonists

Katrine Qvortrup<sup>1</sup>, Jakob F. Jensen<sup>1</sup>, Mikael S. Sørensen<sup>2</sup>, Irene Kouskoumvekaki<sup>2</sup>, Rasmus K. Petersen<sup>3</sup>, Olivier Taboureau<sup>2,4</sup>, Karsten Kristiansen<sup>3</sup>, and Thomas E. Nielsen<sup>1,5</sup> \*

<sup>1</sup>Department of Chemistry, Technical University of Denmark, DK-2800 Kgs. Lyngby, Denmark

<sup>2</sup>Center for Biological Sequence Analysis, Department of Systems Biology, Technical University of Denmark, DK-2800 Kgs. Lyngby, Denmark

<sup>3</sup>Department of Biology, University of Copenhagen, Ole Maaløes Vej 5, DK-2200, Copenhagen, Denmark

<sup>4</sup>Molécules Thérapeutiques in silico (MTi), Inserm UMR-S 973 - Université Paris Diderot, Bat Lamarck A, 35 Rue Hélène Brion, 75205 Paris, France

<sup>5</sup>Singapore Centre on Environmental Life Sciences Engineering, Nanyang Technological University, Singapore 637551, Singapore

### S1: Supporting Information

#### Contents

|                                                                                 |    |
|---------------------------------------------------------------------------------|----|
| General Methods                                                                 | S1 |
| Preparation and spectroscopic data of lead compound 4                           | S1 |
| Preparation and spectroscopic data of pyranopyrazole library compounds 10a-10ah | S9 |

### S2: Model set of compounds for development of binding mode model

### S3: Training set of compounds for validation of binding mode model

#### General Methods

All reagents used were commercially available. All solvents were of HPLC grade. Analytical LC-MS analysis was performed on a Waters AQUITY UPLC system equipped with PDA and SQD MS detector; column: AQUITY UPLC BEH C18 1.7 $\mu$ m, 2.1 x 50mm; column temp: 65 °C; solvent A: 0.1% formic acid (aq); solvent B: 0.1% formic acid (acetonitrile); gradient: 5% B to 100% B in 2.4 min, hold for 0.1 min, total run-time ca. 2.6 min. <sup>1</sup>H and <sup>13</sup>C NMR 300 MHz spectra were recorded on a Varian Mercury 300 BB spectrometer at room temperature. All NMR spectra were recorded using CDCl<sub>3</sub> or DMSO-*d*<sub>6</sub> as solvents.

#### Preparation and spectroscopic data of lead compound 4

##### 1,5-bis(chloromethyl)-2,4-dimethylbenzene (12)

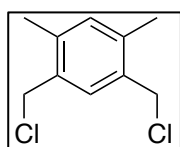

<sup>1</sup>H NMR (300 MHz, CDCl<sub>3</sub>):  $\delta$  = 7.26 (s, 1H, ArH), 7.06 (s, 1H, ArH), 4.58 (s, 4H, CH<sub>2</sub>Cl), 2.40 (s, 6H, 2 x ArCH<sub>3</sub>).

<sup>13</sup>C NMR (75 MHz, CDCl<sub>3</sub>):  $\delta$  = 138.09, 133.61, 133.38, 131.33, 44.50, 18.54.

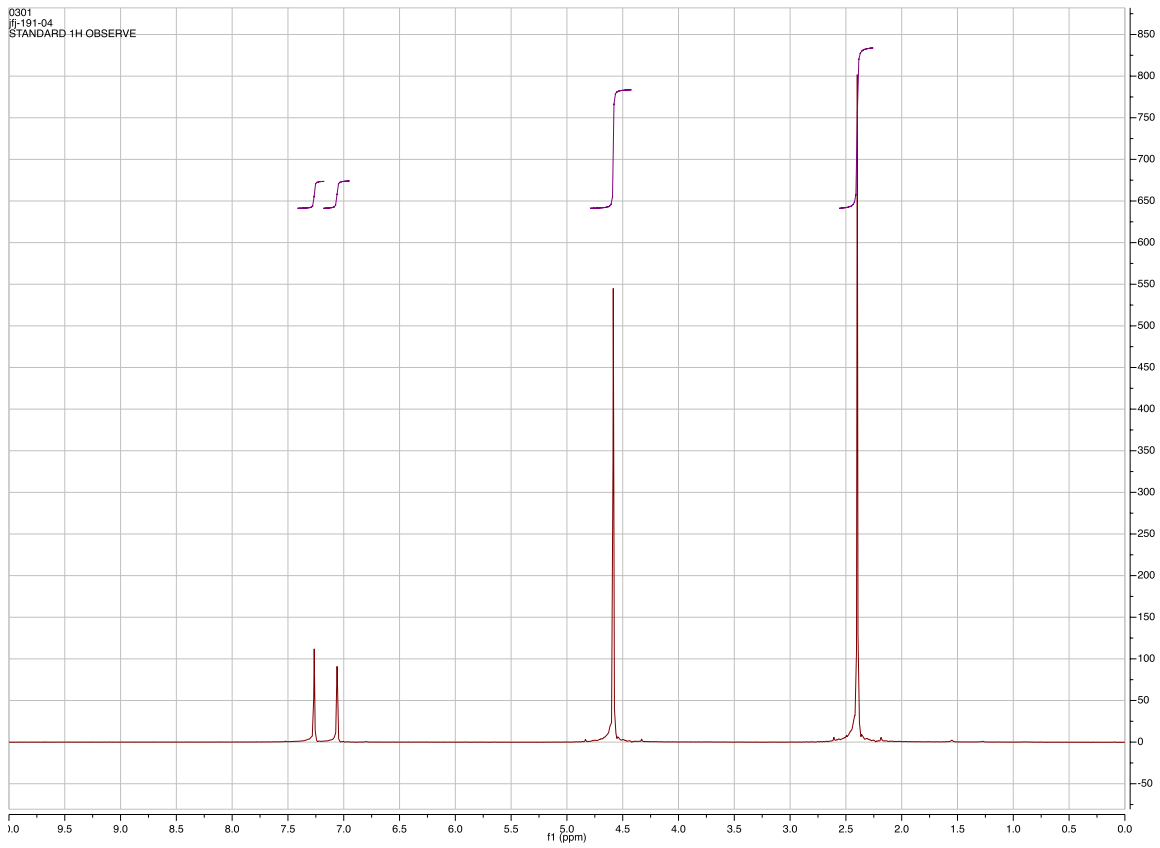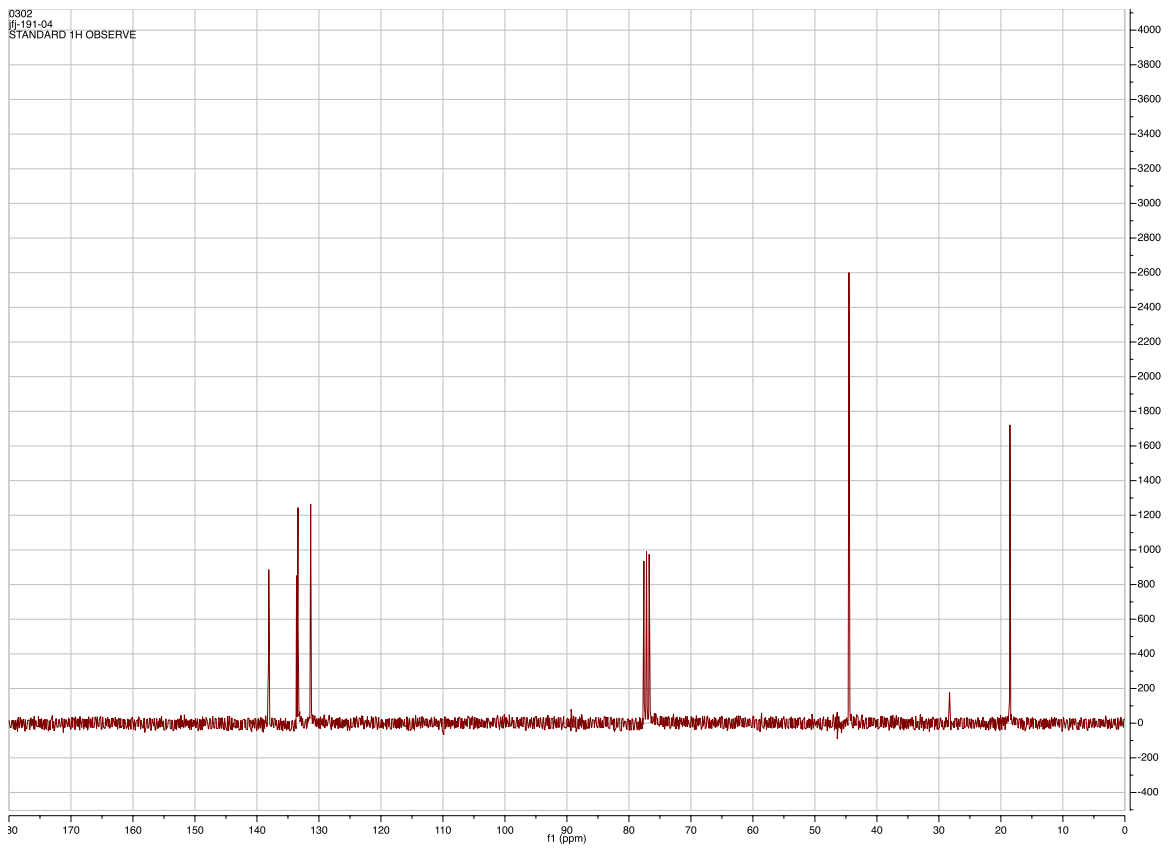

### 4,6-dimethylisophthalaldehyde (13)

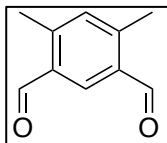

$^1\text{H}$  NMR (300 MHz,  $\text{CDCl}_3$ ):  $\delta$  = 10.25 (d,  $J$  = 0.6 Hz, 2H, 2  $\times$  CHO), 8.22 (s, 1H, ArH), 7.18 (s, 1H, ArH), 2.70 (d,  $J$  = 0.9 Hz, 6H, 2  $\times$  ArCH $_3$ ).

$^{13}\text{C}$  NMR (75 MHz,  $\text{CDCl}_3$ ):  $\delta$  = 191.71, 146.38, 136.94, 135.82, 132.78, 20.18.

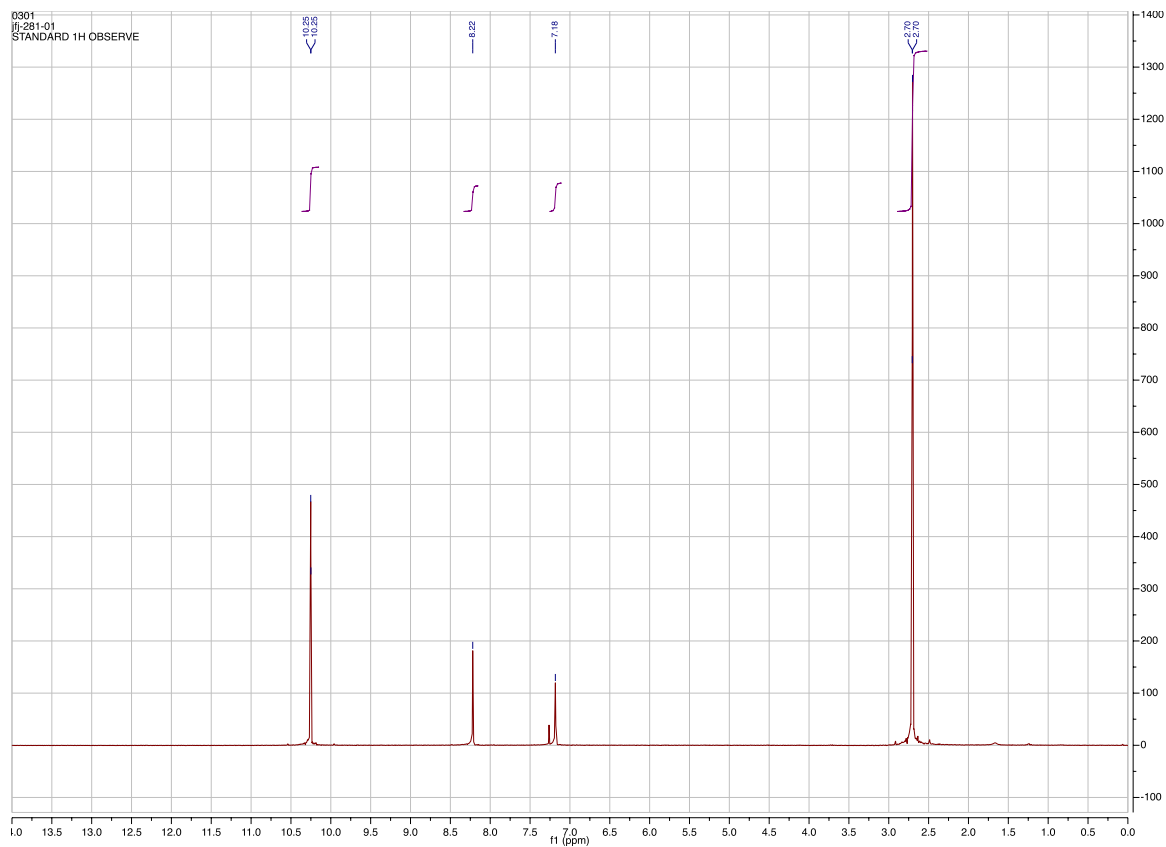

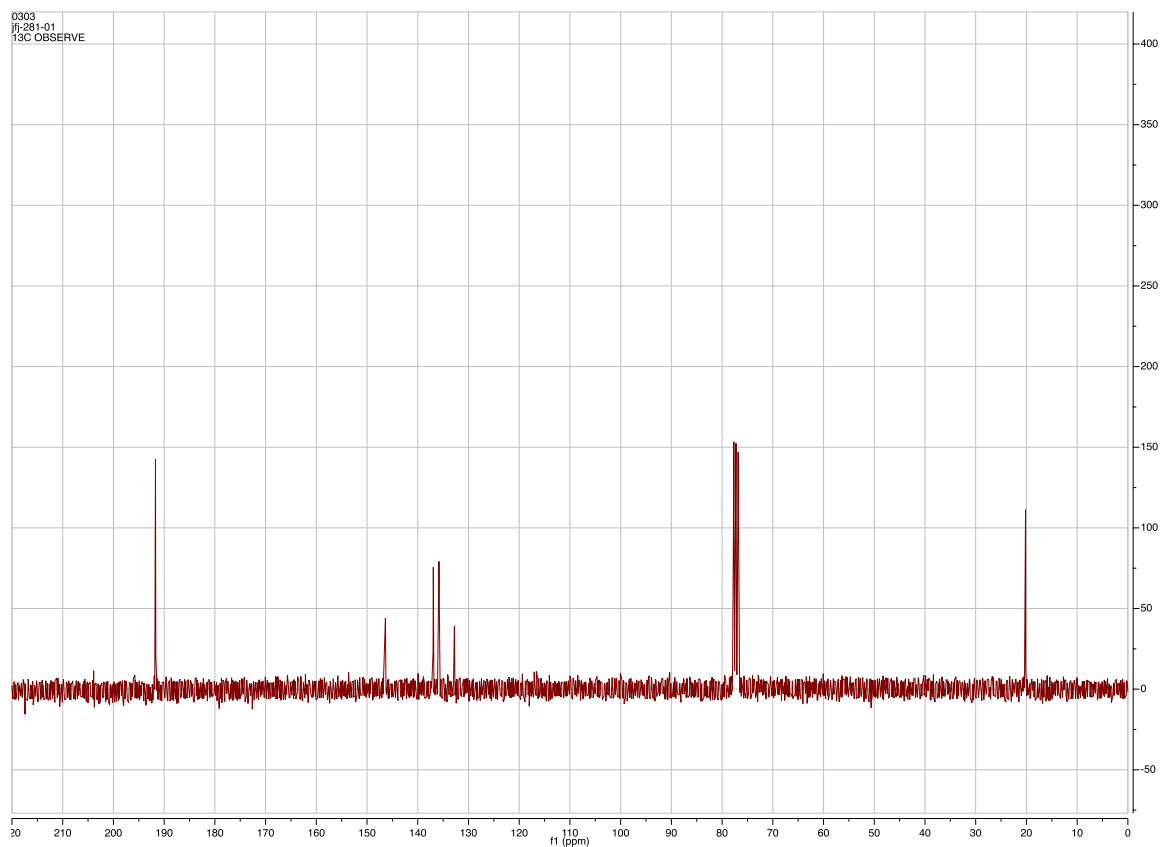

### 5-(bromomethyl)-2,4-dimethylbenzaldehyde (14)

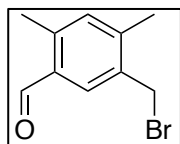

$^1\text{H}$  NMR (300 MHz,  $\text{CDCl}_3$ ):  $\delta$  = 10.20 (s, 1H,  $\text{CHO}$ ), 7.74 (s, 1H,  $\text{ArH}$ ), 7.10 (s, 1H,  $\text{ArH}$ ), 4.53 (s, 2H,  $\text{CH}_2\text{Br}$ ), 2.63 (s, 3H,  $\text{ArCH}_3$ ), 2.45 (s, 3H,  $\text{ArCH}_3$ ).

$^{13}\text{C}$  NMR (75 MHz,  $\text{CDCl}_3$ ):  $\delta$  = 191.82, 143.80, 141.37, 134.54, 134.21, 133.46, 132.64, 31.20, 19.27, 19.13.

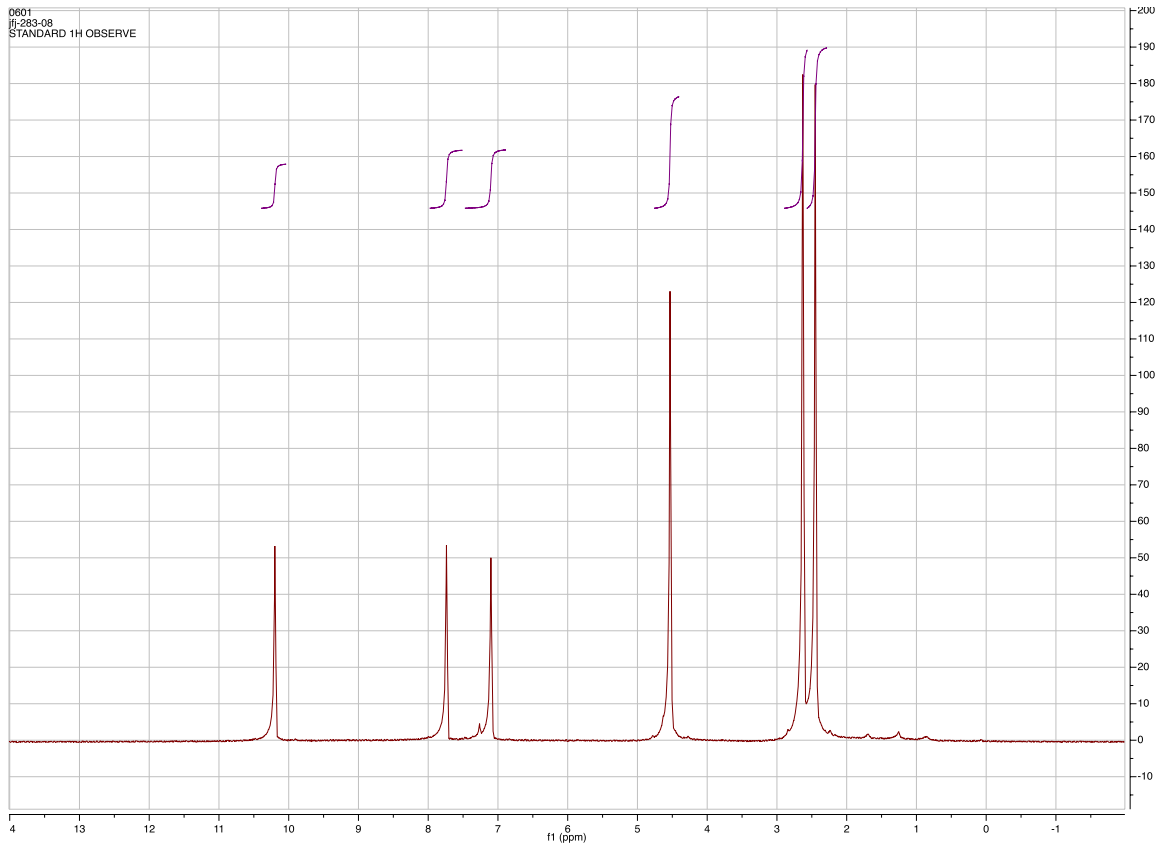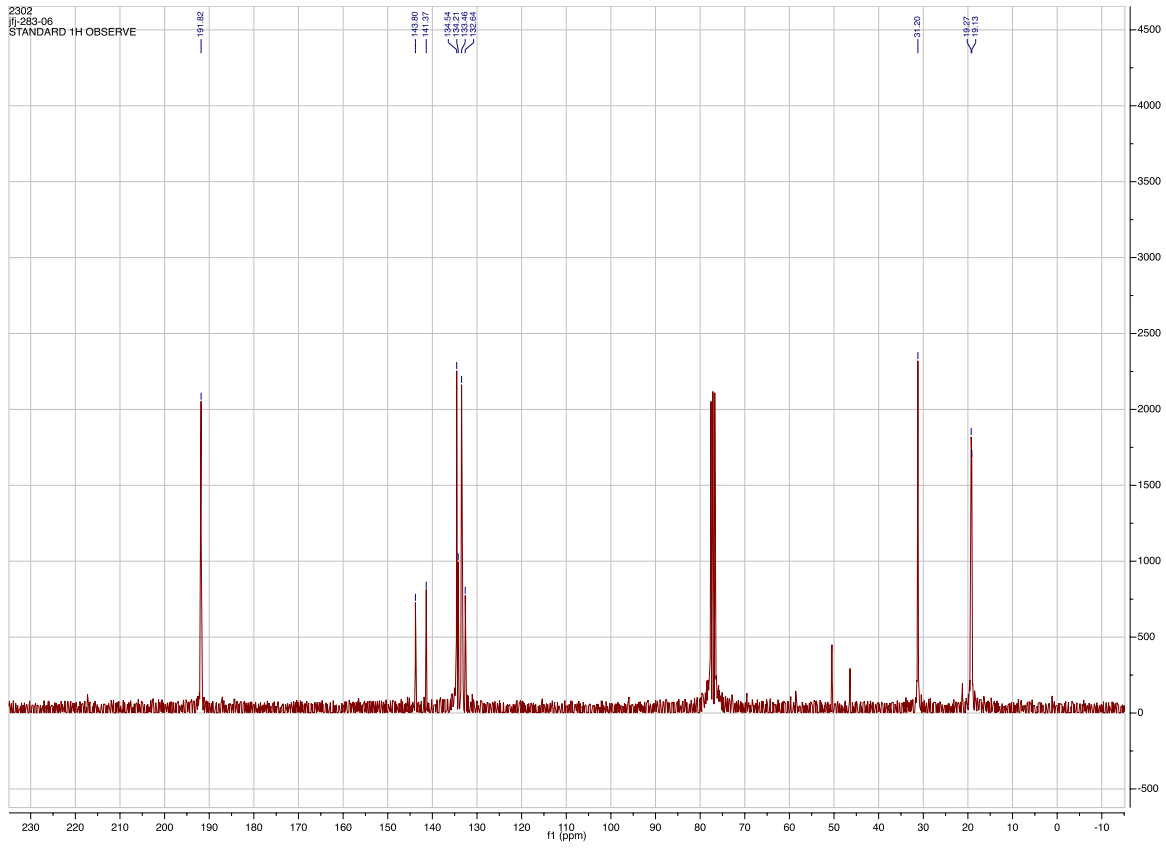

### 5-((4-chloro-3-methylphenoxy)methyl)-2,4-dimethylbenzaldehyde (15)

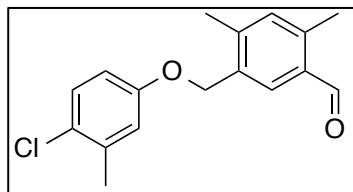

$^1\text{H}$  NMR (300 MHz,  $\text{CDCl}_3$ ):  $\delta$  = 10.22 (d,  $J$  = 0.9 Hz, 1H, CHO), 7.84 (s, 1H, ArH), 7.20-7.07 (m, 2H, ArH), 6.83 (dd,  $J$  = 8.0, 1.1 Hz, 1H, ArH), 5.02 (s, 2H,  $\text{OCH}_2\text{Ar}$ ), 2.65 (s, 3H,  $\text{ArCH}_3$ ), 2.40 (s, 3H,  $\text{ArCH}_3$ ), 2.22 (d,  $J$  = 0.8 Hz, 3H,  $\text{ArCH}_3$ ).

$^{13}\text{C}$  NMR (75 MHz,  $\text{CDCl}_3$ ):  $\delta$  = 192.29, 155.38, 143.27, 140.71, 134.17, 133.27, 132.31, 132.26, 130.71, 129.05, 126.49, 125.59,

112.35, 68.23, 19.31, 19.23, 16.38.

### 5-Methyl-1H-pyrazol-5(4H)-one (17)

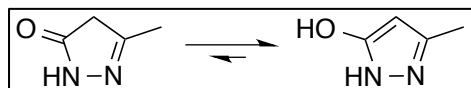

$^1\text{H}$  NMR (300 MHz,  $\text{CDCl}_3$ ):  $\delta$  = 10.40 (bs, 2H, NH + OH (tautomeric enol form)), 5.21 (s, 1H,  $\text{CH}=\text{COH}$  (tautomeric enol form)), 2.08 (s, 3H,  $\text{ArCH}_3$ ).

$^{13}\text{C}$  NMR (75 MHz,  $\text{CDCl}_3$ ):  $\delta$  = 161.22, 139.54, 89.03 (tautomeric enol form), 49.37 (tautomeric keto form), 11.28.

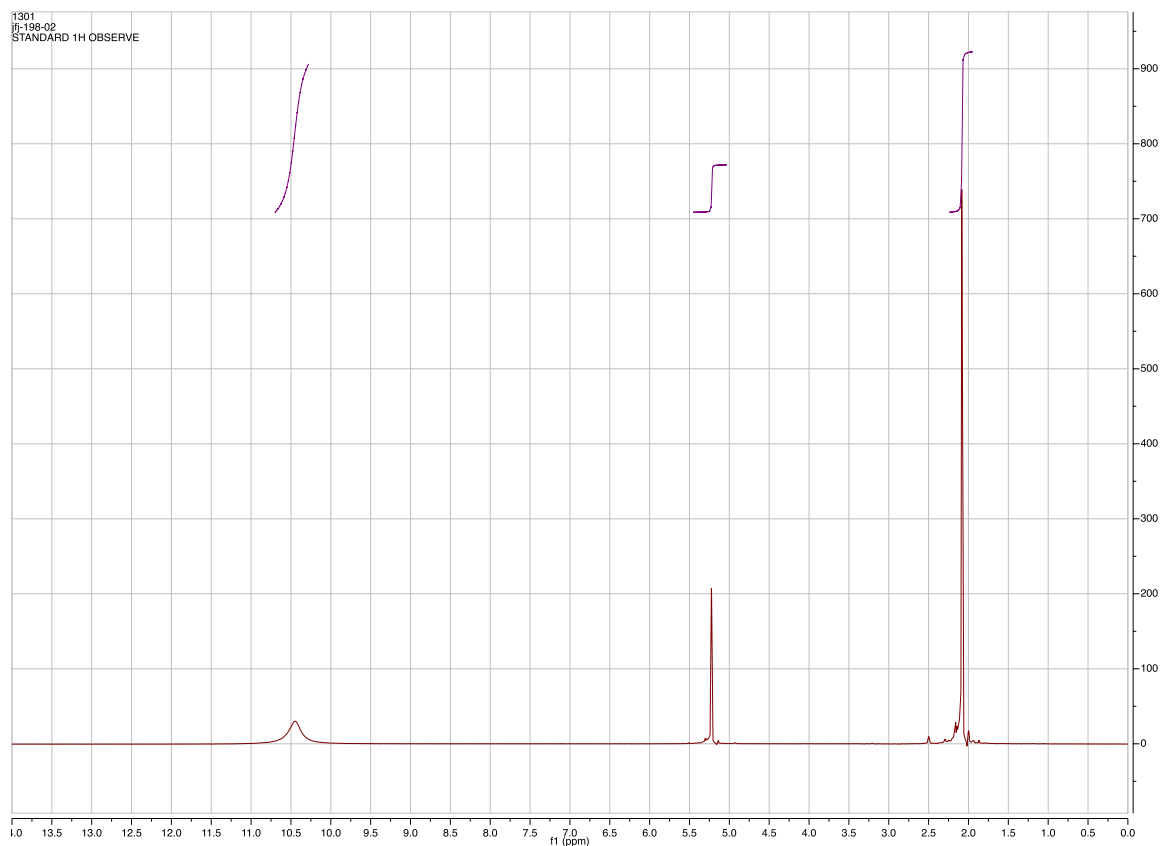

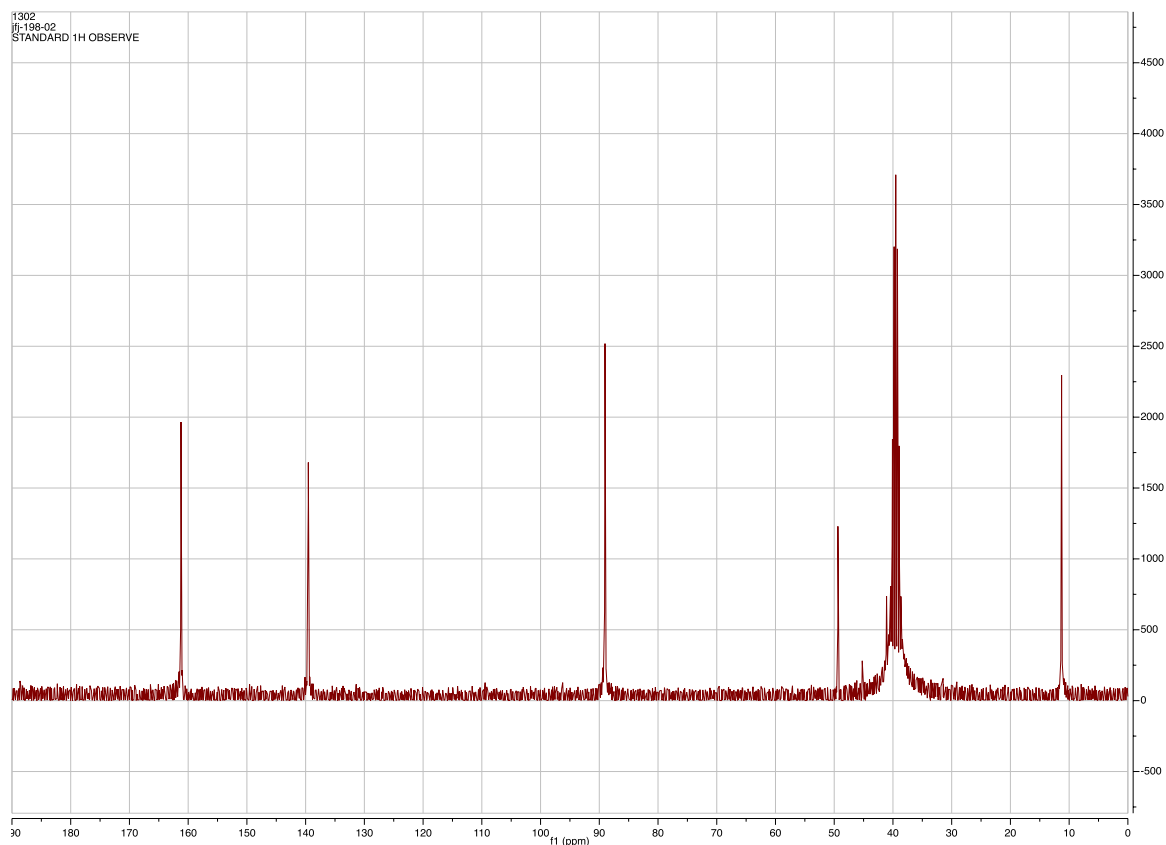

**6-amino-4-(5-((4-chloro-3-methylphenoxy)methyl)-2,4-dimethylphenyl)-3-methyl-1,4-dihydropyrazolo[2,3-c]pyrazole-5-carbonitrile (4)**

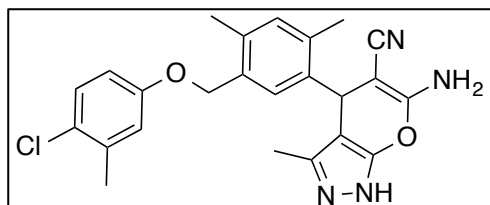

$^1\text{H}$  NMR (300 MHz,  $\text{DMSO-}d_6$ ):  $\delta$  = 12.06 (s, 1H, ArNH), 7.21-7.18 (m, 1H, ArH), 7.14 (d,  $J$  = 8.8 Hz, 1H, ArH), 7.06 (s, 1H, ArH), 7.03-6.96 (m, 2H, ArH), 6.82 (s, 2H, ArNH<sub>2</sub>), 4.99 (s, 2H, ArCH<sub>2</sub>OAr), 4.80 (s, 1H, CHAr), 2.28 (s, 3H, ArCH<sub>3</sub>), 2.24 (s, 3H, ArCH<sub>3</sub>), 2.06 (s, 3H, ArCH<sub>3</sub>), 1.63 (s, 3H, ArCH<sub>3</sub>);

$^{13}\text{C}$  NMR (75 MHz,  $\text{DMSO-}d_6$ ):  $\delta$  = 160.76, 155.15, 155.09, 139.44, 135.27, 134.38, 134.26, 132.85, 132.19, 129.91, 128.69, 128.40, 126.30, 123.80, 120.88, 113.32, 97.64, 67.80, 56.99, 49.28, 18.53, 17.94, 15.78, 9.57.

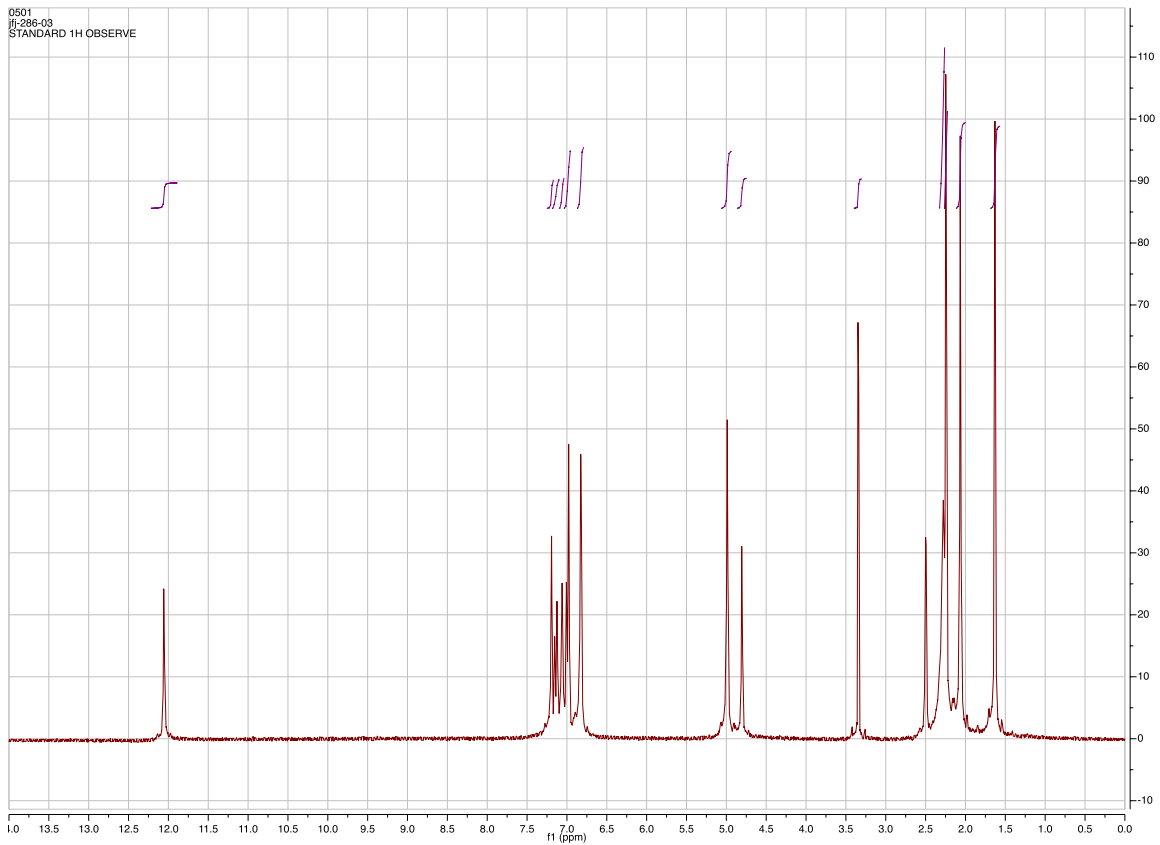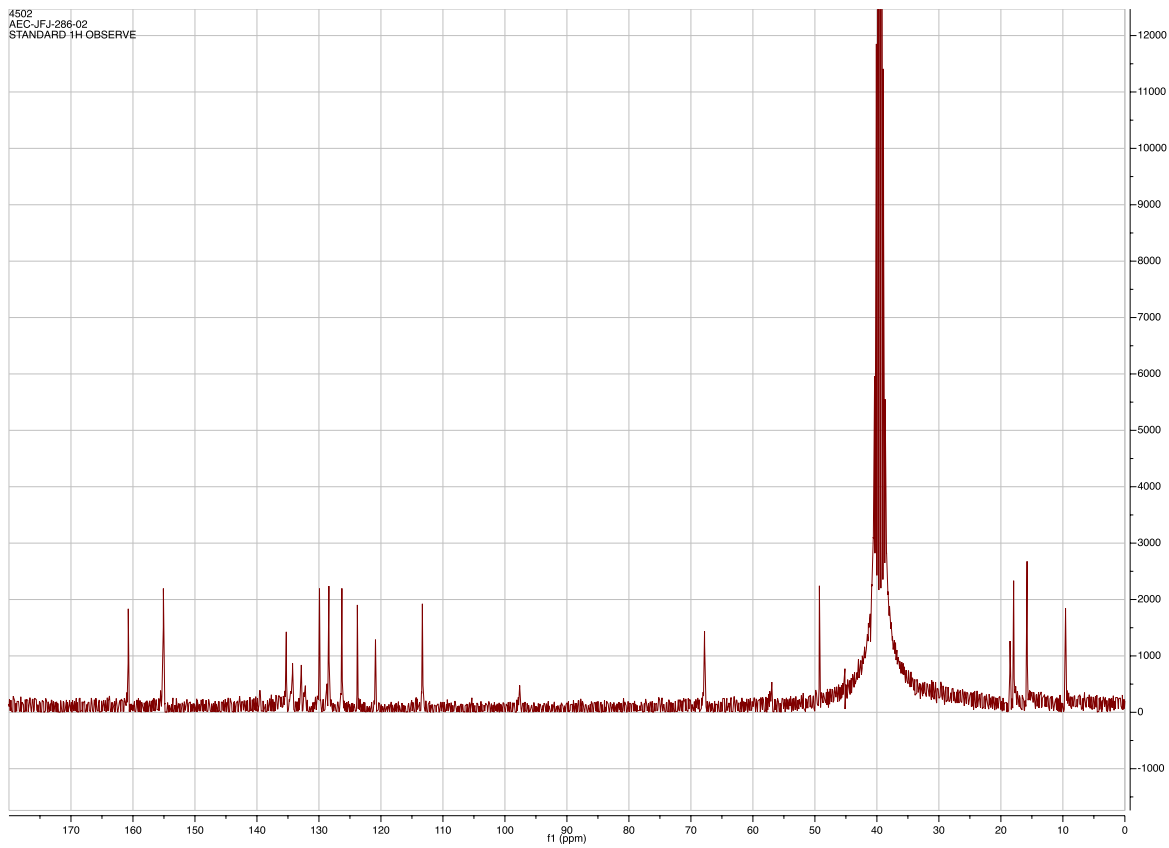



## Preparation and spectroscopic data of pyranopyrazole library compounds 10a-10ah

### 6-Amino-3-benzyl-4-(2,5-dimethylphenyl)-1,4-dihydropyranopyrazole-5-carbonitrile (10a)

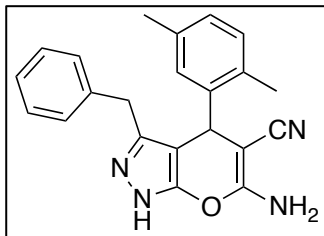

UPLC: Rt = 1.82, 1.88 (2,4-dihydro tautomer);

UPLC-MS (ESI) calculated for C<sub>22</sub>H<sub>21</sub>N<sub>4</sub>O [M + H]<sup>+</sup>: *m/z* = 357.2, found *m/z* = 357.2;

<sup>1</sup>H NMR (300 MHz, DMSO-*d*<sub>6</sub>): δ = 12.33 (s, 1H, ArNH), 7.13 (s, 3H, 3 × ArH), 7.04 – 6.79 (m, 4H, 4 × ArH), 6.80 – 6.63 (m, 3H, ArH + ArNH<sub>2</sub>), 4.70 (s, 1H, CHAr), 3.56 (d, *J* = 15.6 Hz, 1H, ArCHH), 3.27 (d, *J* = 15.7 Hz, 1H, ArCHH), 2.15 (s, 3H, ArCH<sub>3</sub>), 2.11 (s, 3H, ArCH<sub>3</sub>).

<sup>13</sup>C NMR (75 MHz, DMSO-*d*<sub>6</sub>): δ = 160.53, 155.23, 138.08, 137.34, 135.14, 132.02, 130.52, 129.50, 129.43, 128.31, 127.98, 127.43, 126.28, 120.69, 97.59, 56.90, 49.38, 30.36, 20.68, 18.42;  
IR (neat): 1486, 1597, 1632, 2194, 3088, 3243, 3473.

3: UV Detector: TIC

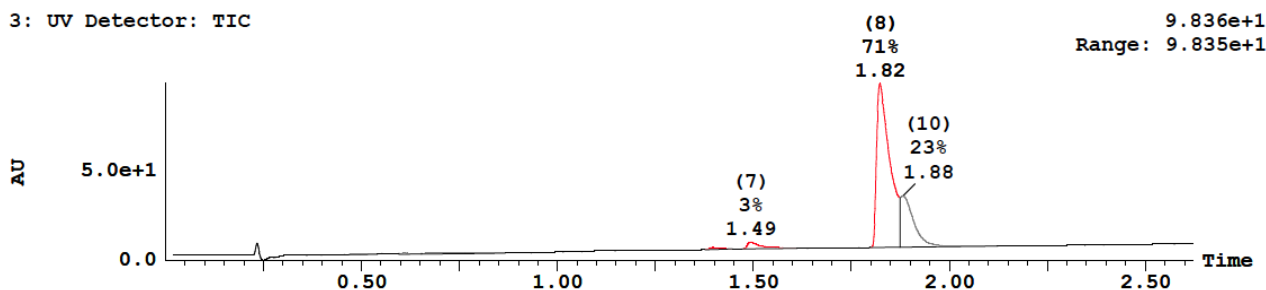

3301  
TEN-KQ-pyranopyrazoleA  
STANDARD 1H OBSERVE

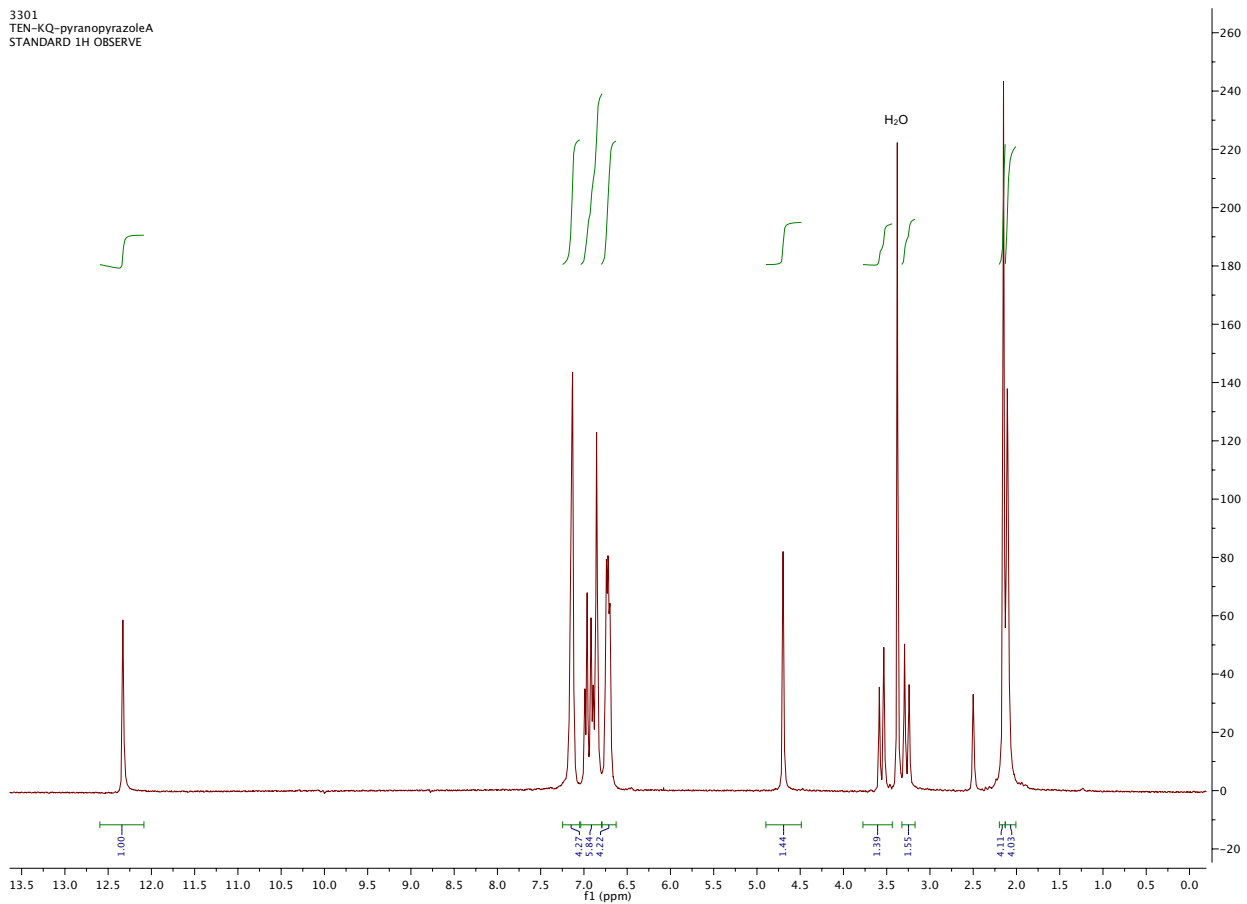

3302  
TEN-KQ-pyranopyrazoleA  
STANDARD 1H OBSERVE

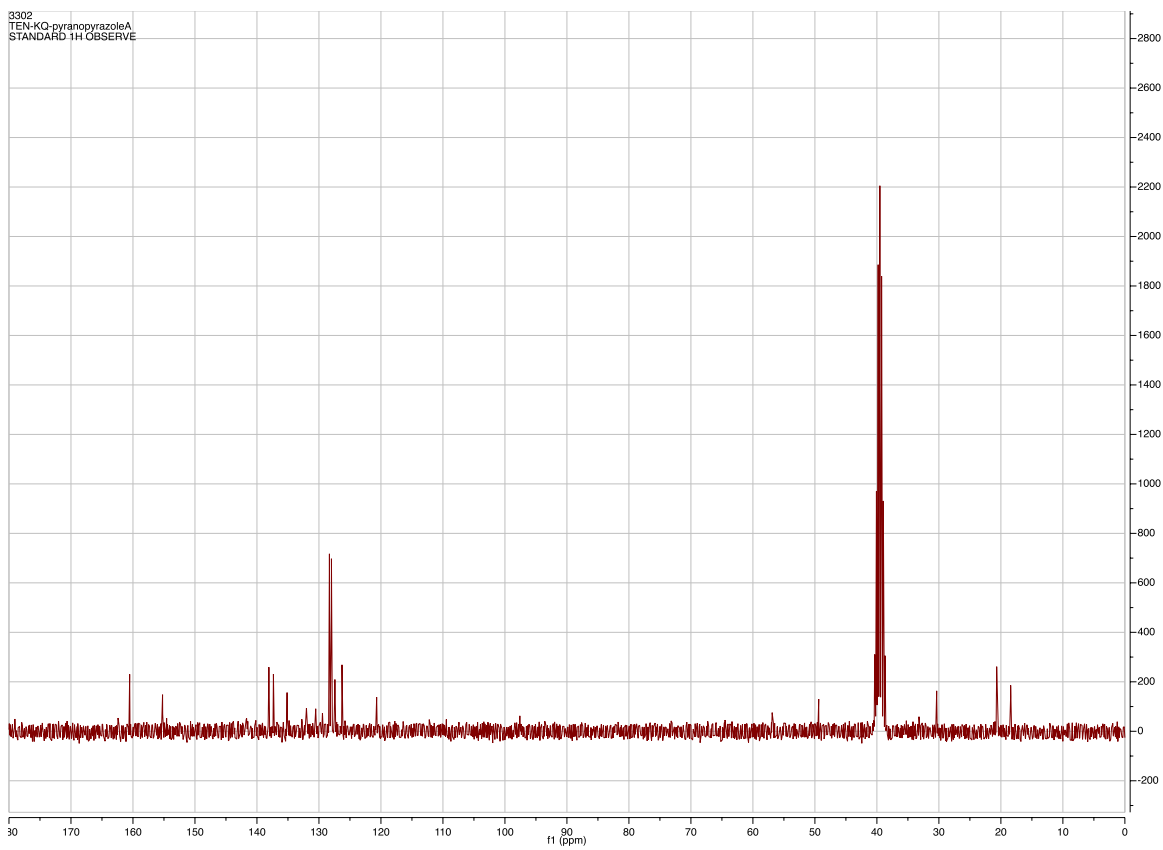



**6-amino-3-benzyl-4-(*o*-tolyl)-1,4-dihydropyrano[2,3-*c*]pyrazole-5-carbonitrile (10b)**

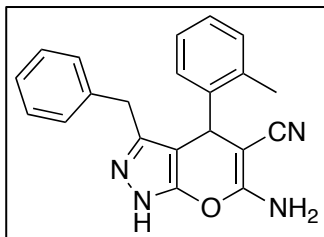

UPLC: Rt = 1.72, 1.78 (2,4-dihydro tautomer).

UPLC-MS (ESI) calculated for C<sub>22</sub>H<sub>21</sub>N<sub>4</sub>O [M + H]<sup>+</sup>: *m/z* = 343.2, found *m/z* = 343.2;

<sup>1</sup>H NMR (300 MHz, DMSO-*d*<sub>6</sub>): δ = 12.34 (s, 1H, ArNH), 7.93-6.15 (m, 11H, 9 × ArH + ArNH<sub>2</sub>), 4.74 (s, 1H, CHAr), 3.58 (d, *J* = 16.1 Hz, 1H, ArCHH), 3.24 (d, *J* = 16.2 Hz, 1H, ArCHH), 2.12 (s, 3H, ArCH<sub>3</sub>);

<sup>13</sup>C NMR (75 MHz, DMSO-*d*<sub>6</sub>): δ = 160.59, 155.23, 141.95, 138.07, 137.34, 135.12, 130.62, 129.07, 128.38, 127.99, 126.73, 126.37, 126.31, 120.66, 97.54, 56.76, 56.09, 30.35, 18.77.

3: UV Detector: TIC

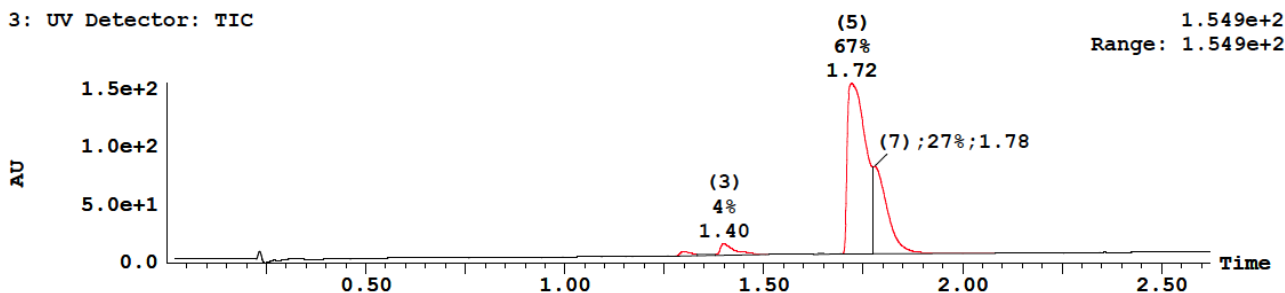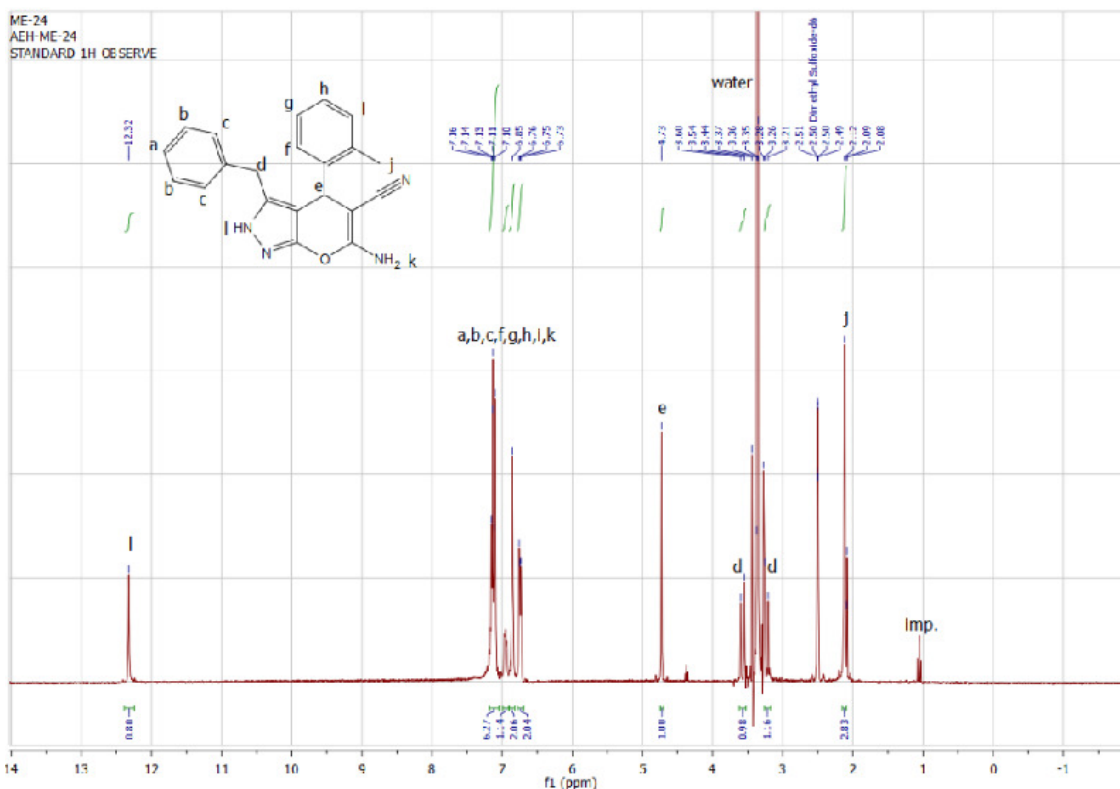

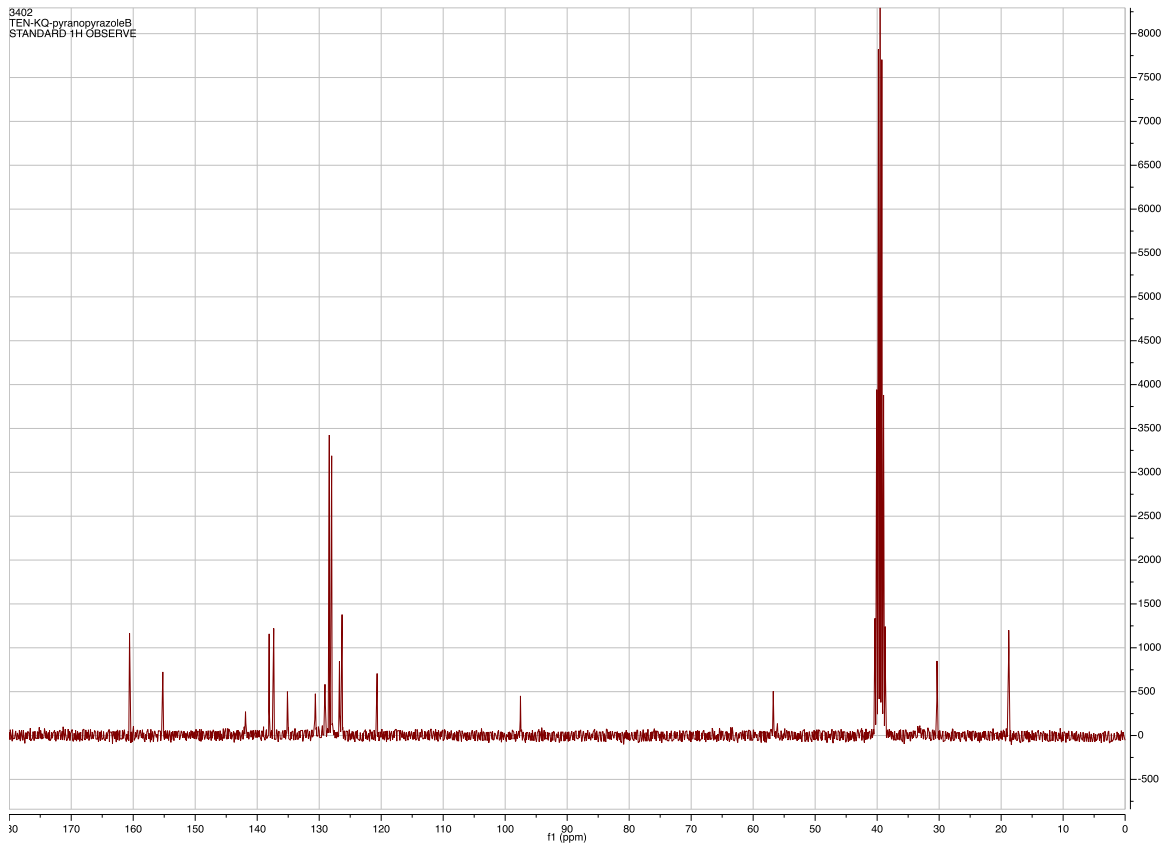

**6-amino-3-benzyl-4-(2,4-dimethylphenyl)-1,4-dihydropyranopyrazole-5-carbonitrile (10c)**

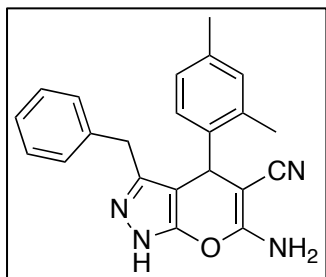

UPLC: Rt = 1.84, 1.89 (2,4-dihydro tautomer);

UPLC-MS (ESI) calculated for C<sub>22</sub>H<sub>21</sub>N<sub>4</sub>O [M + H]<sup>+</sup>: m/z = 357.2, found m/z = 357.2;

<sup>1</sup>H NMR (300 MHz, DMSO-*d*<sub>6</sub>): δ = 12.33 (s, 1H, ArNH), 7.23-7.10 (m, 3H, ArH), 7.01-6.81 (m, 4H, ArH), 6.78-6.65 (m, 3H, ArH + ArNH<sub>2</sub>), 4.70 (s, 1H, CHAr), 3.56 (d, *J* = 15.6 Hz, 1H, ArCHH), 3.27 (d, *J* = 15.7 Hz, 1H, ArCHH), 2.15 (s, 3H, ArCH<sub>3</sub>), 2.11 (s, 3H, ArCH<sub>3</sub>);

<sup>13</sup>C NMR (75 MHz, DMSO-*d*<sub>6</sub>): δ = 160.49, 155.20, 138.94, 138.05, 137.37, 135.64, 134.87, 131.26, 129.05, 128.33, 127.99, 126.95, 126.24, 120.67, 97.63, 56.94, 50.43, 30.33, 20.58, 18.69.

3: UV Detector: TIC

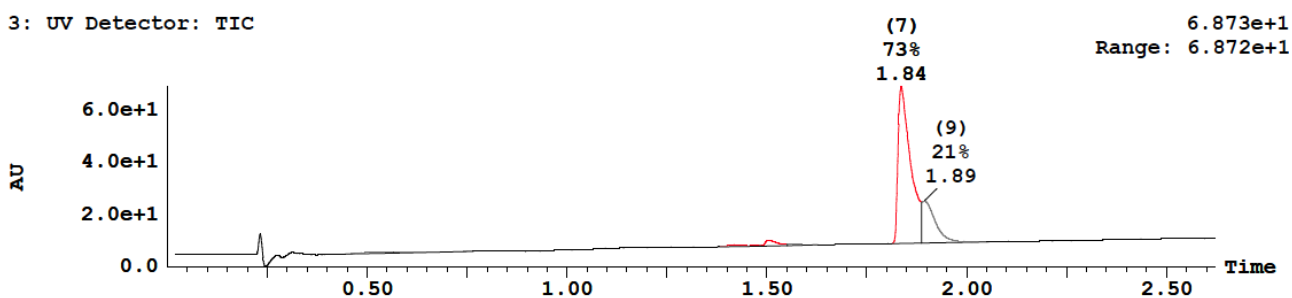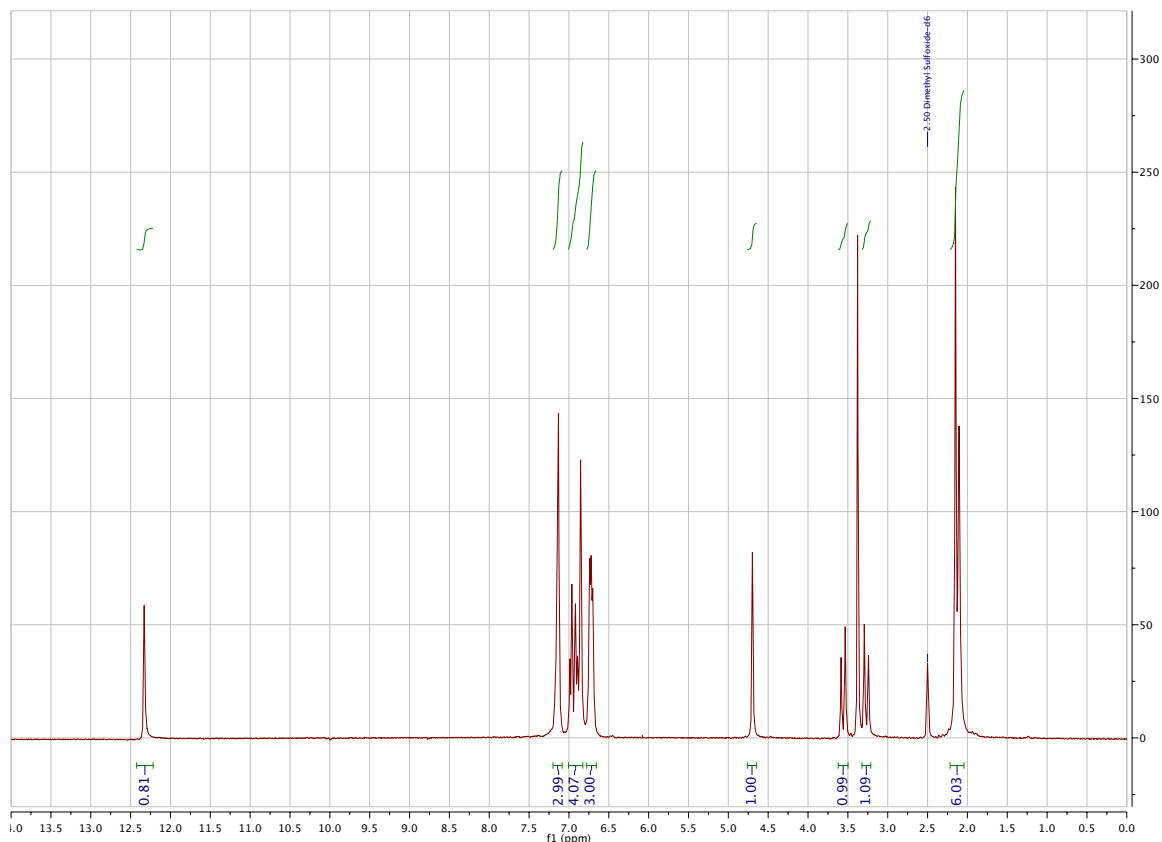

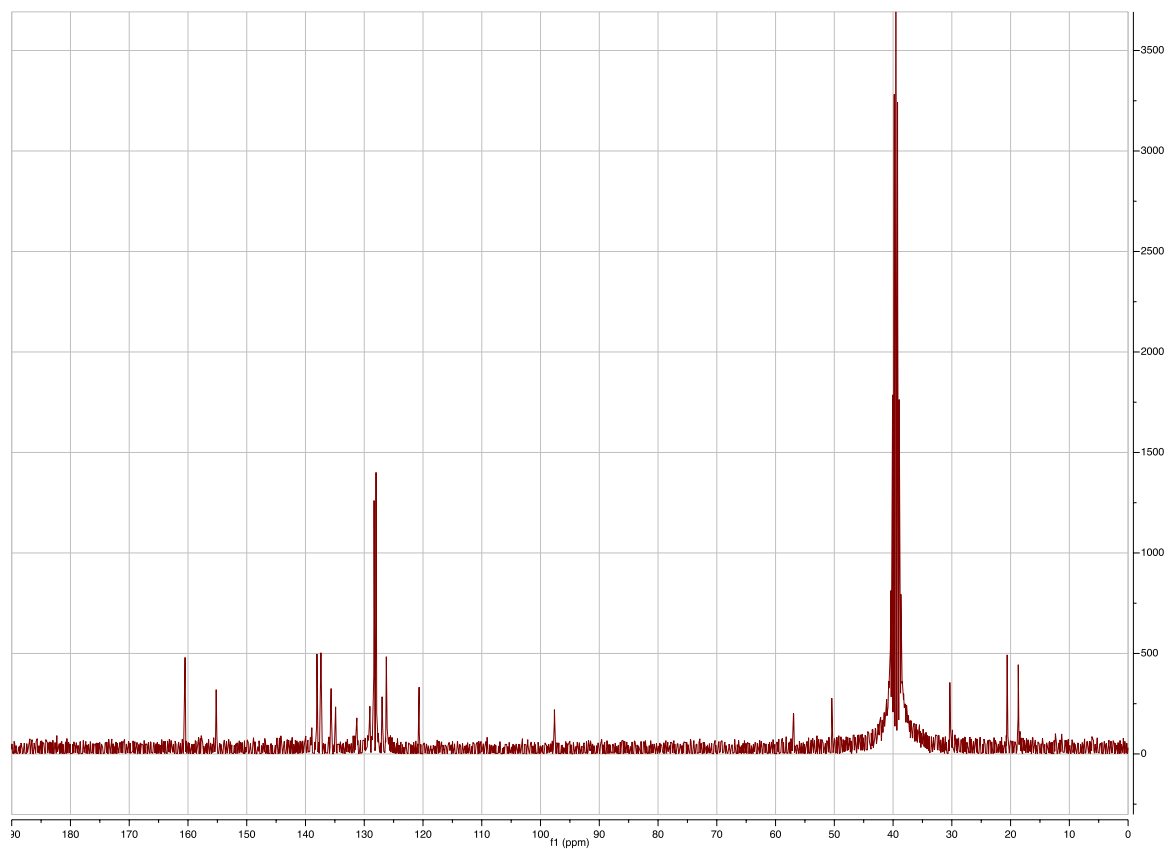

**6-amino-3-benzyl-4-(4-methoxy-2,3-dimethylphenyl)-1,4-dihydropyrano[2,3-c]pyrazole-5-carbonitrile (10d)**

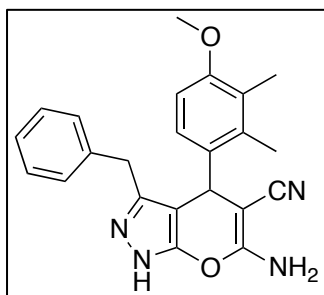

UPLC: Rt = 1.81, 1.87 (2,4-dihydro tautomer);

UPLC-MS (ESI) calculated for C<sub>23</sub>H<sub>23</sub>N<sub>4</sub>O<sub>2</sub> [M + H]<sup>+</sup>: m/z = 387.2, found m/z = 387.2;

<sup>1</sup>H NMR (300 MHz, DMSO-*d*<sub>6</sub>): δ 12.30 (s, 1H, ArNH), 7.18-7.08 (m, 3H, ArH), 6.86-6.69 (m, 6H, 4 × ArH + ArNH<sub>2</sub>), 4.74 (s, 1H, CHAr), 3.73 (s, 3H, ArOCH<sub>3</sub>), 3.55 (d, *J* = 15.7 Hz, 1H, ArCHH), 3.26 (d, *J* = 15.7 Hz, 1H, ArCHH), 2.03 (s, 6H, 2 × ArCH<sub>3</sub>);

<sup>13</sup>C NMR (101 MHz, DMSO-*d*<sub>6</sub>): δ = 160.3, 155.7, 155.1, 138.0, 137.4, 137.3, 135.0, 128.1, 127.9, 126.1, 120.7, 108.2, 98.3, 58.0, 55.3, 30.3, 14.7, 11.9.

3: UV Detector: TIC

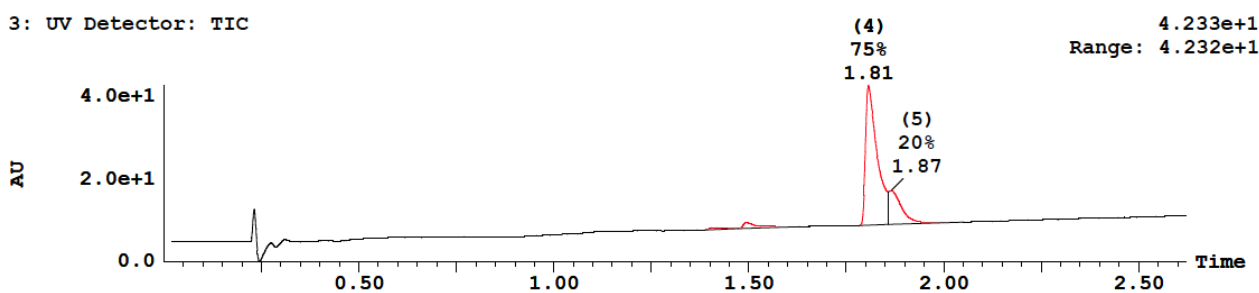

3601  
TEN-KQ-pyranopyrazoleD  
STANDARD 1H OBSERVE

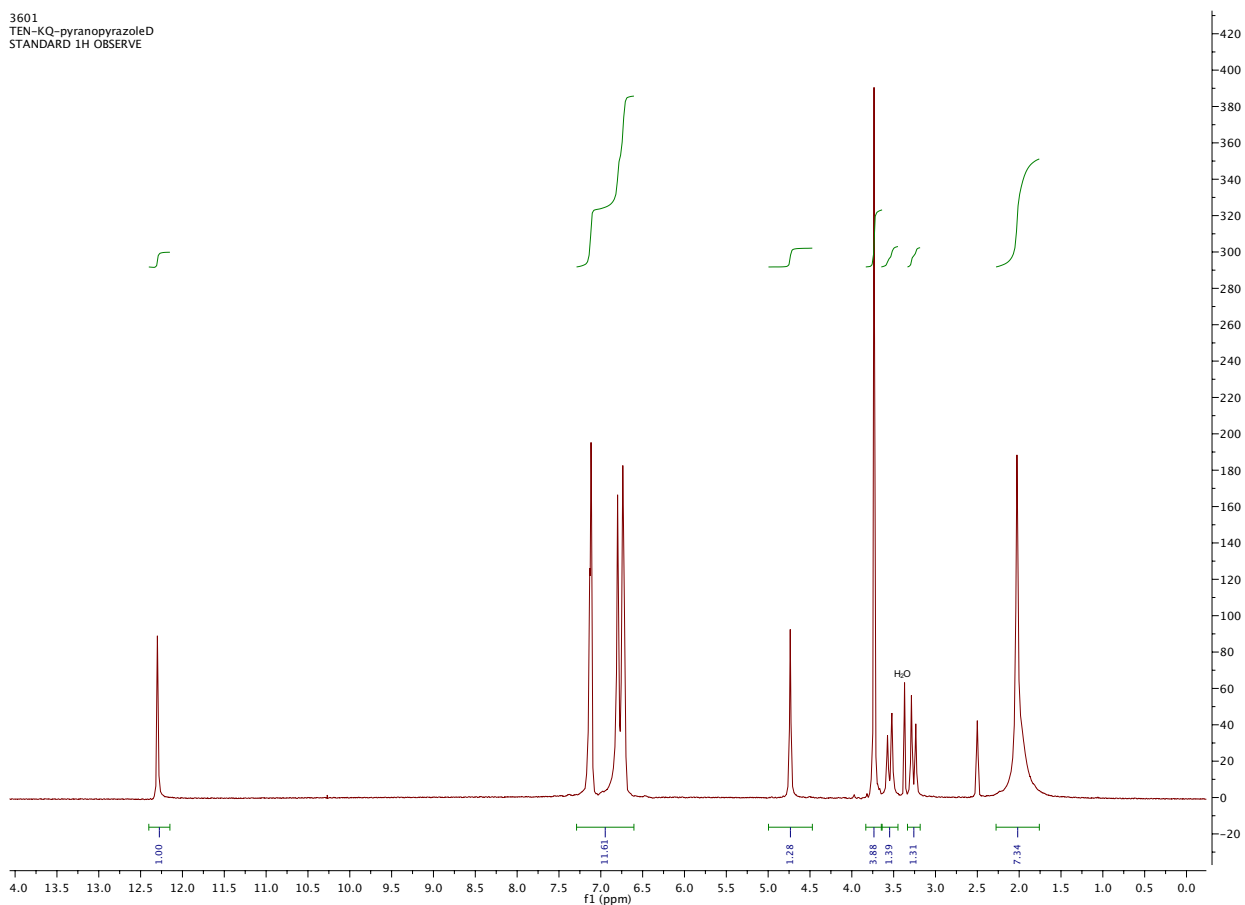



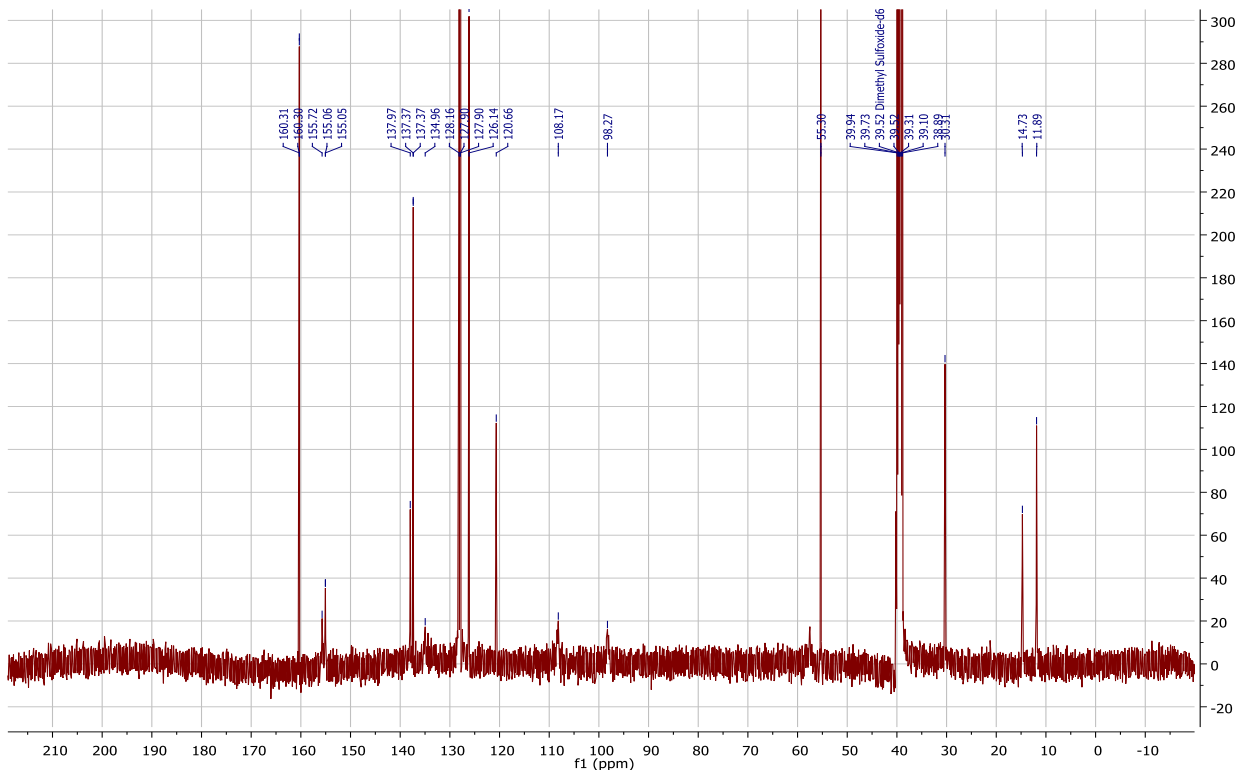

### 6-amino-4-(4-chlorophenyl)-3-phenyl-1,4-dihydropyrano[2,3-c]pyrazole-5-carbonitrile (10e)

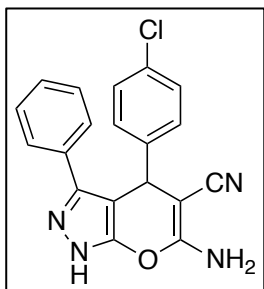

UPLC: Rt = 1.84, 1.89 (2,4-dihydro tautomer);

UPLC-MS (ESI) calculated for  $C_{19}H_{14}ClN_4O_2 [M + H]^+$ :  $m/z = 349.1$  ( $^{35}Cl$ ),  $351.1$  ( $^{37}Cl$ ), found  $m/z = 349.1$  (100 %),  $351.1$  (30 %);

$^1H$  NMR (400 MHz,  $DMSO-d_6$ ):  $\delta = 12.93$  (s, 1H, ArNH), 7.50-7.43 (m, 2H, ArH), 7.37-7.23 (m, 5H, 5  $\times$  ArH), 7.17-7.09 (m, 2H, 2  $\times$  ArH), 6.98 (s, 2H, ArNH<sub>2</sub>), 5.06 (s, 1H, CHAr);

$^{13}C$  NMR (100 MHz,  $DMSO-d_6$ ):  $\delta = 160.56, 156.35, 144.04, 138.47, 131.54, 129.68, 129.07, 128.93, 128.87, 128.74, 126.69, 120.92, 97.40, 58.24, 36.48$ .

3: UV Detector: TIC

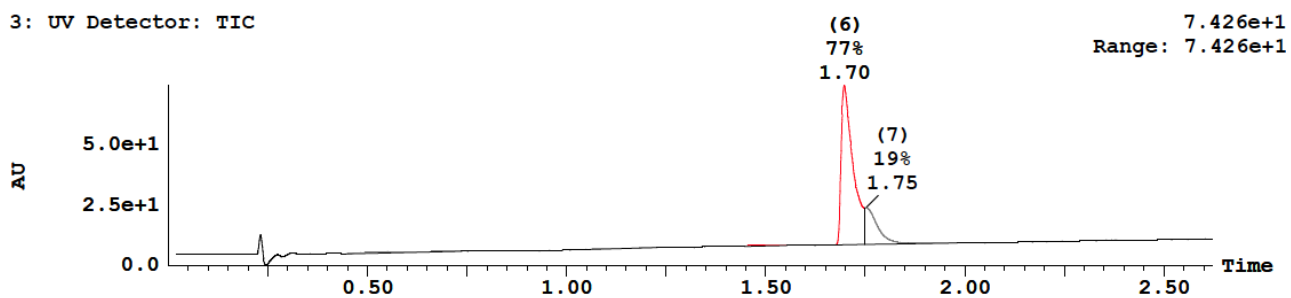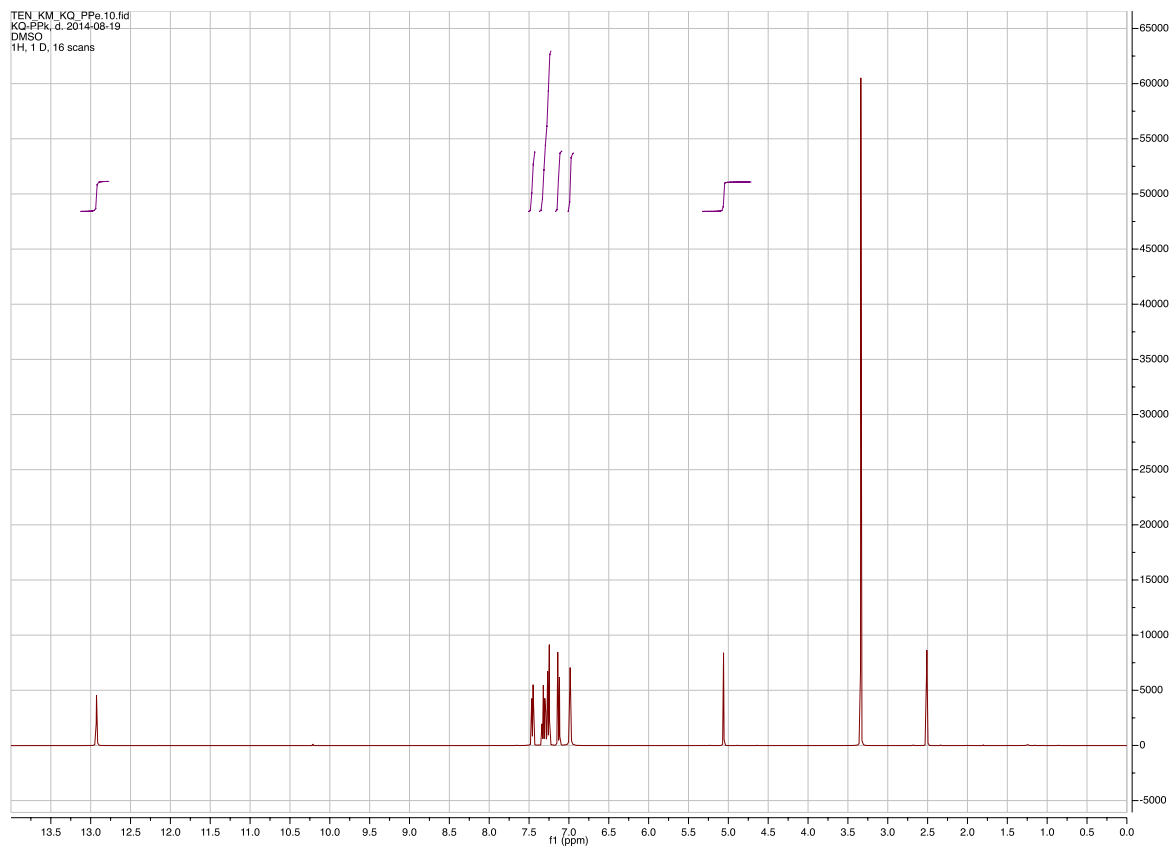

TEN\_KM\_KQ\_PPe.11.tif  
KQ-PPe, d. 2014-08-19  
DMSO  
13C, 1 D, 256 scans

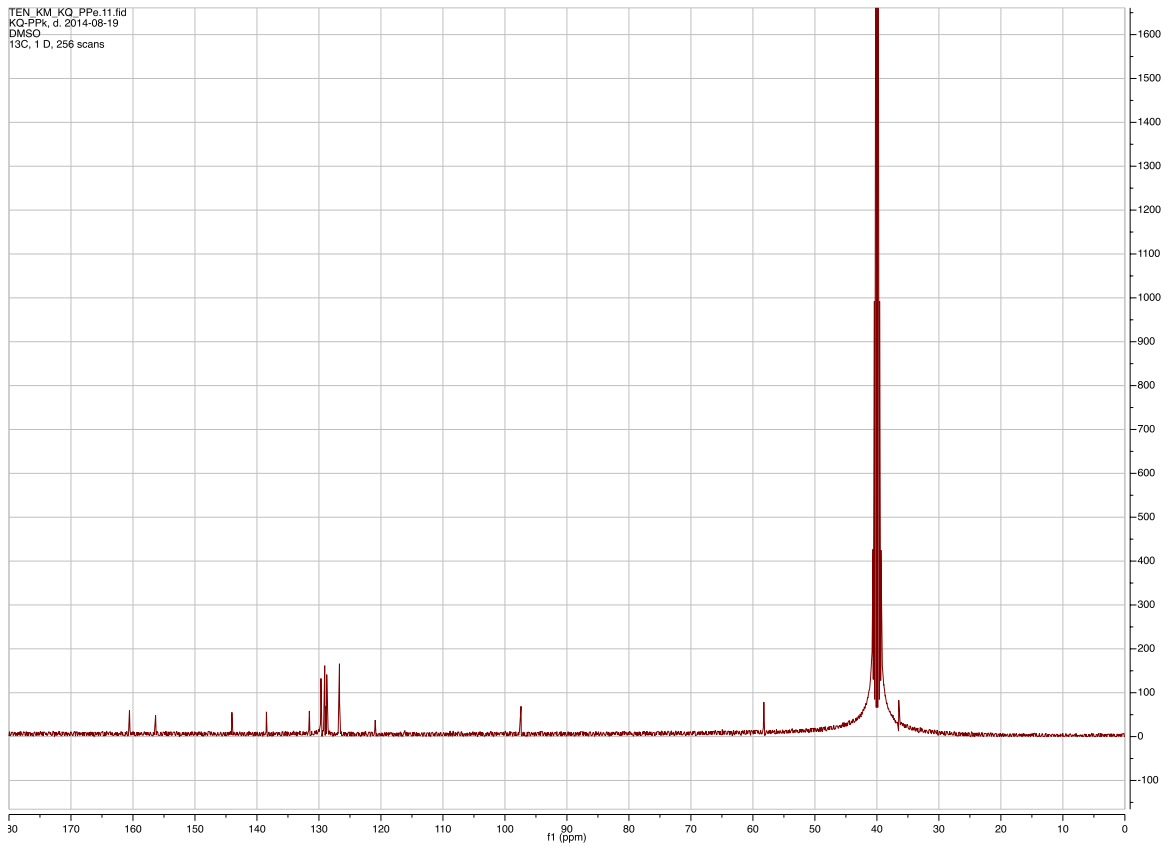

## 6-amino-4-(2,4-dichlorophenyl)-3-phenyl-1,4-dihydropyrano[2,3-c]pyrazole-5-carbonitrile (10f)

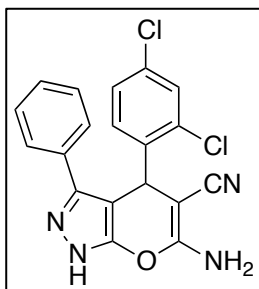

UPLC-UV: Rt = 1.80, 1.86 (2,4-dihydro tautomer);

UPLC-MS (ESI) calculated for C<sub>19</sub>H<sub>12</sub>Cl<sub>2</sub>N<sub>4</sub>O [M + H]<sup>+</sup>: m/z = 383.1 (2 x <sup>35</sup>Cl), 385.0 (1 x <sup>37</sup>Cl, 1 x <sup>35</sup>Cl), found m/z = 383.1 (100 %), 385.1 (65 %);

<sup>1</sup>H NMR (400 MHz, DMSO-*d*<sub>6</sub>): δ = 12.92 (s, 1H, ArNH), 7.50-7.00 (m, 10H, 8 x ArH + 2 x ArNH<sub>2</sub>), 5.45 (s, 1H, CHAr);

<sup>13</sup>C NMR (100 MHz, DMSO-*d*<sub>6</sub>): δ = 160.58, 156.10, 140.22, 138.05, 132.97, 132.08, 131.98, 128.58 (two overlapping signals), 128.38, 127.80, 126.13 (two overlapping signals), 120.02, 96.14, 55.96, 49.26.

3: UV Detector: TIC

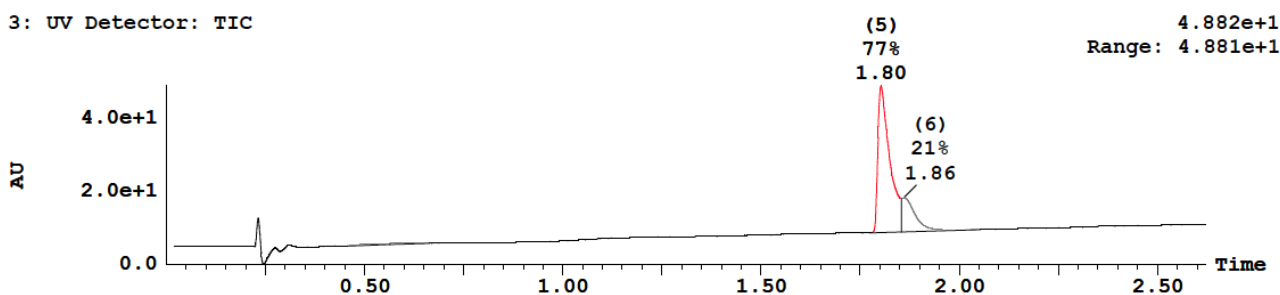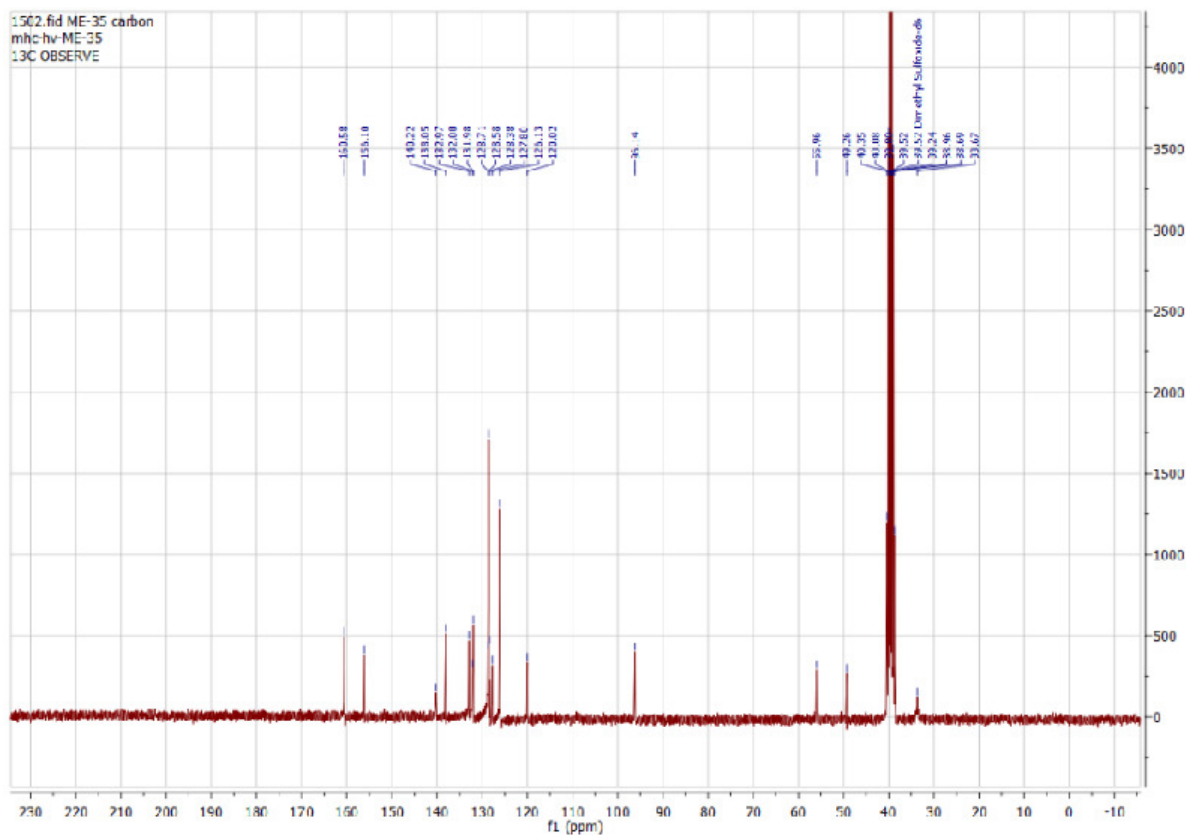



**6-amino-4-(2,5-dimethylphenyl)-3-phenyl-1,4-dihydropyranopyrazole-5-carbonitrile (10g)**

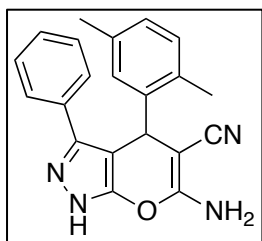

UPLC-UV:  $R_t = 1.73, 1.79$  (2,4-dihydro tautomer). UPLC-MS (ESI) calculated for  $C_{21}H_{19}N_4O$   $[M + H]^+$ :  $m/z = 343.2$ , found  $m/z = 343.2$ .

$^1H$  NMR (300 MHz,  $DMSO-d_6$ ):  $\delta = 12.83$  (s, 1H, ArNH), 7.34 – 7.21 (m, 5H, ArH), 7.00 – 6.88 (m, 3H, 2  $\times$  ArH + 1  $\times$  ArNHH), 6.82 (dd,  $J = 7.8$ , 1.8 Hz, 1H, ArH), 6.71 (s, 1H, ArNHH), 5.14 (s, 1H, CHAr), 2.41 – 2.22 (s, 3H, ArCH<sub>3</sub>), 2.17 – 1.96 (s, 3H, ArCH<sub>3</sub>).

$^{13}C$  NMR (75 MHz,  $DMSO-d_6$ ):  $\delta = 160.12, 156.32, 142.61, 137.81, 135.11, 131.54, 130.39, 128.97, 128.82, 128.52, 128.37, 127.34, 126.16, 120.70, 97.78, 57.71, 33.11, 20.69, 18.56$ .

3: UV Detector: TIC

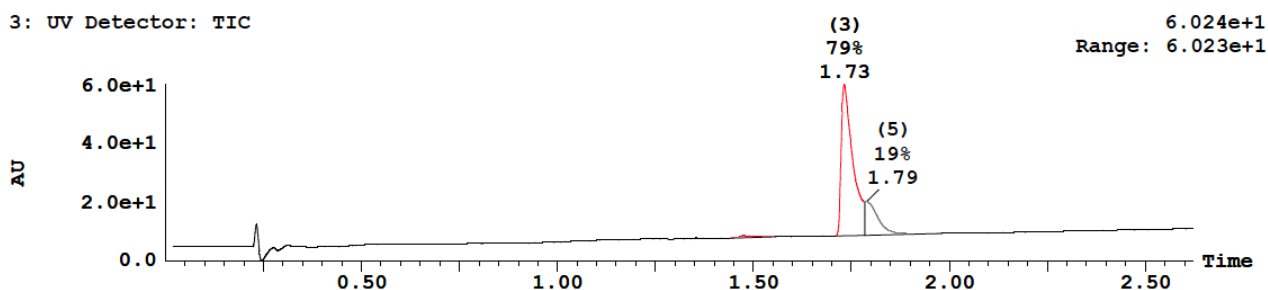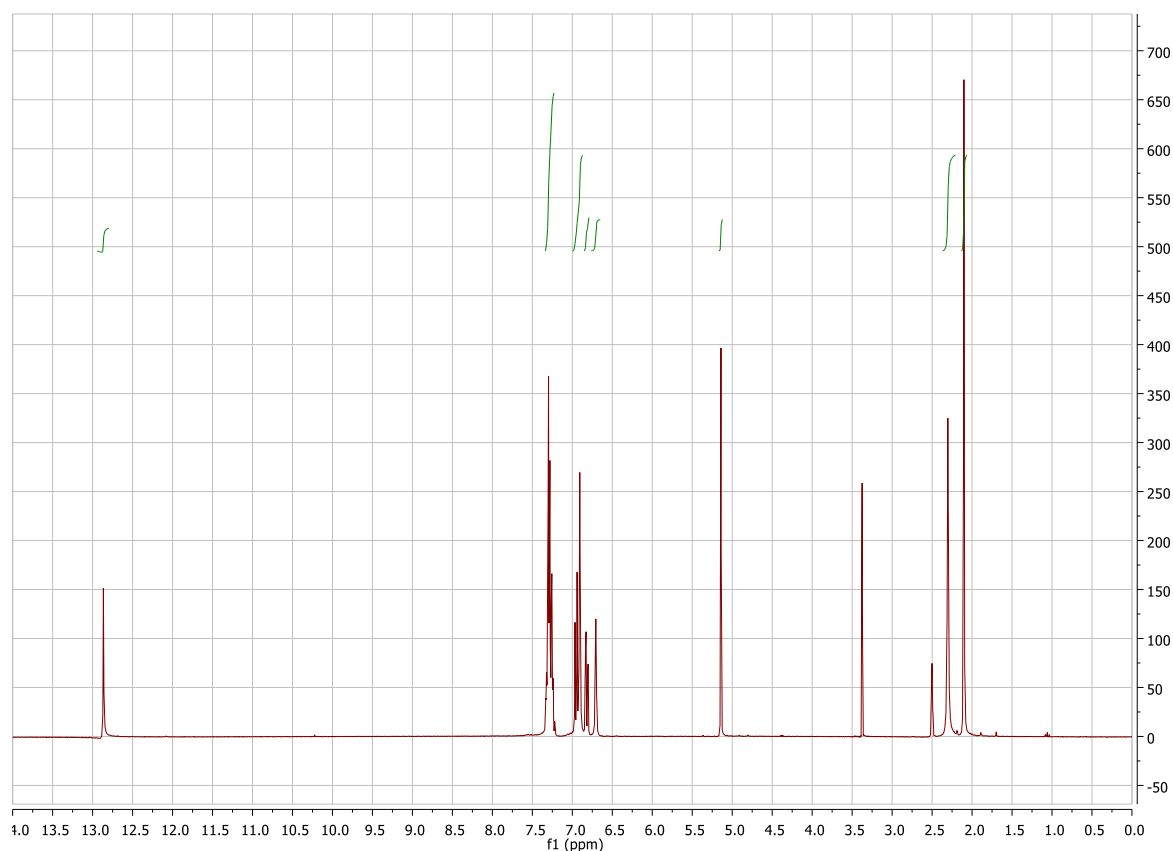

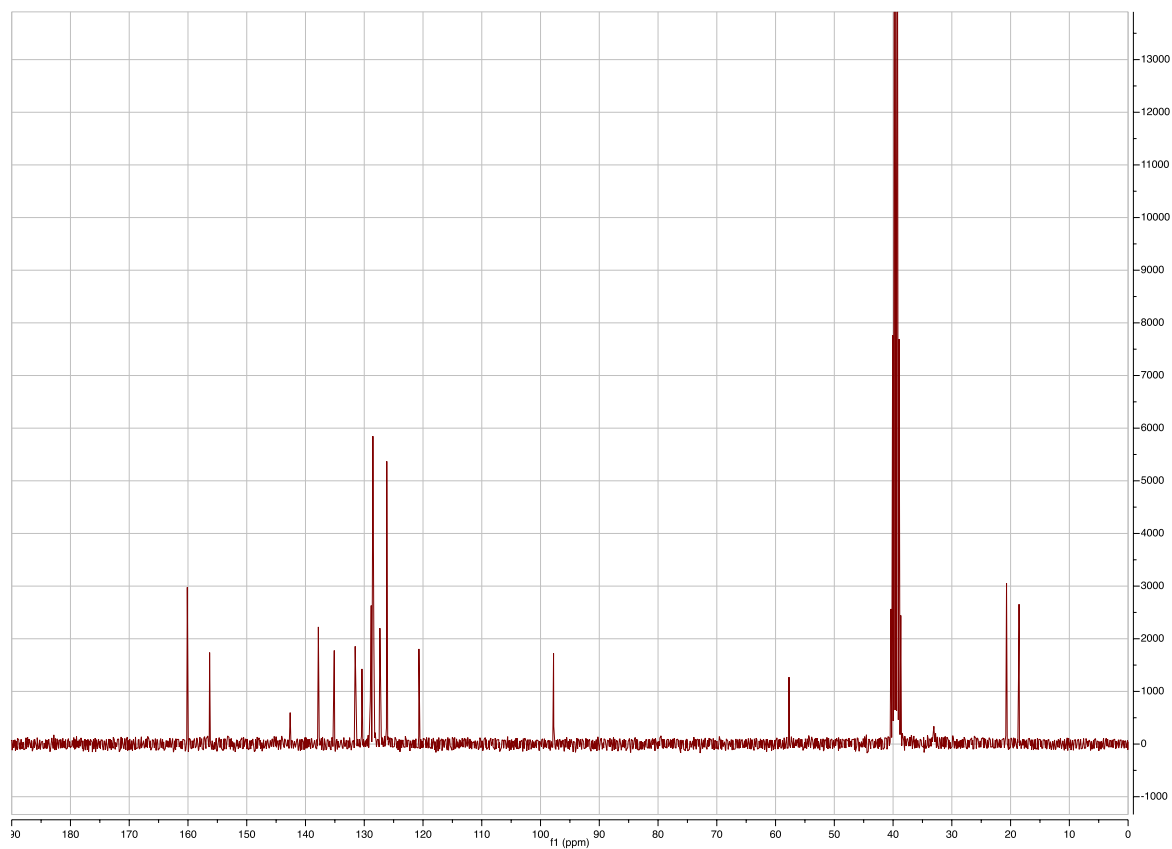

### 6-amino-3,4-diphenyl-1,4-dihydropyrano[2,3-c]pyrazole-5-carbonitrile (10h)

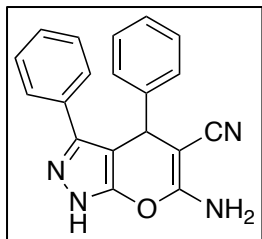

UPLC-UV: Rt = 1.56;

UPLC-MS (ESI) calculated for C<sub>19</sub>H<sub>15</sub>N<sub>4</sub>O [M + H]<sup>+</sup>: m/z = 315.1, found m/z = 315.1;

<sup>1</sup>H NMR (300 MHz, DMSO-*d*<sub>6</sub>): δ = 12.84 (s, 1H, ArNH), 7.44 (d, *J* = 7.1 Hz, 2H, ArH), 7.33 – 7.24 (m, 3H, ArH), 7.22 – 7.17 (m, 2H, ArH), 7.13 – 7.07 (m, 3H, ArH), 6.93 (s, 2H + ArNH<sub>2</sub>), 4.97 (s, 1H, CHAr);

<sup>13</sup>C NMR (75 MHz, DMSO-*d*<sub>6</sub>): δ = 160.05, 156.03, 144.69, 137.87, 128.63, 128.57, 128.34, 128.31, 127.31, 126.63, 126.20, 120.63, 97.42, 58.26, 36.74.

3: UV Detector: TIC

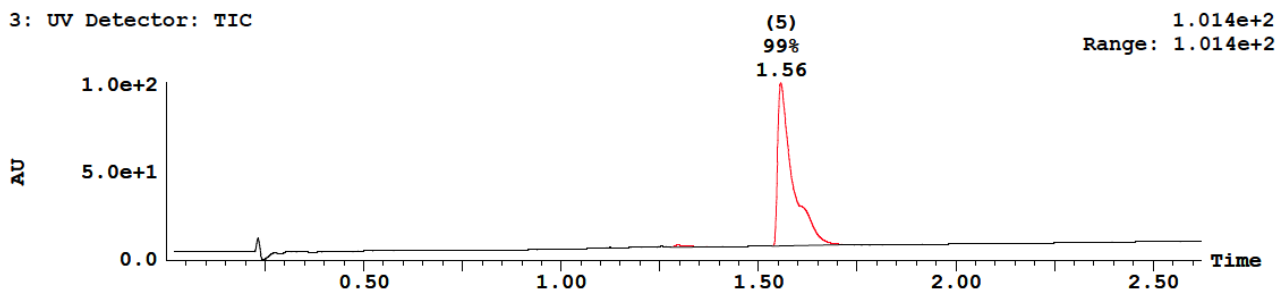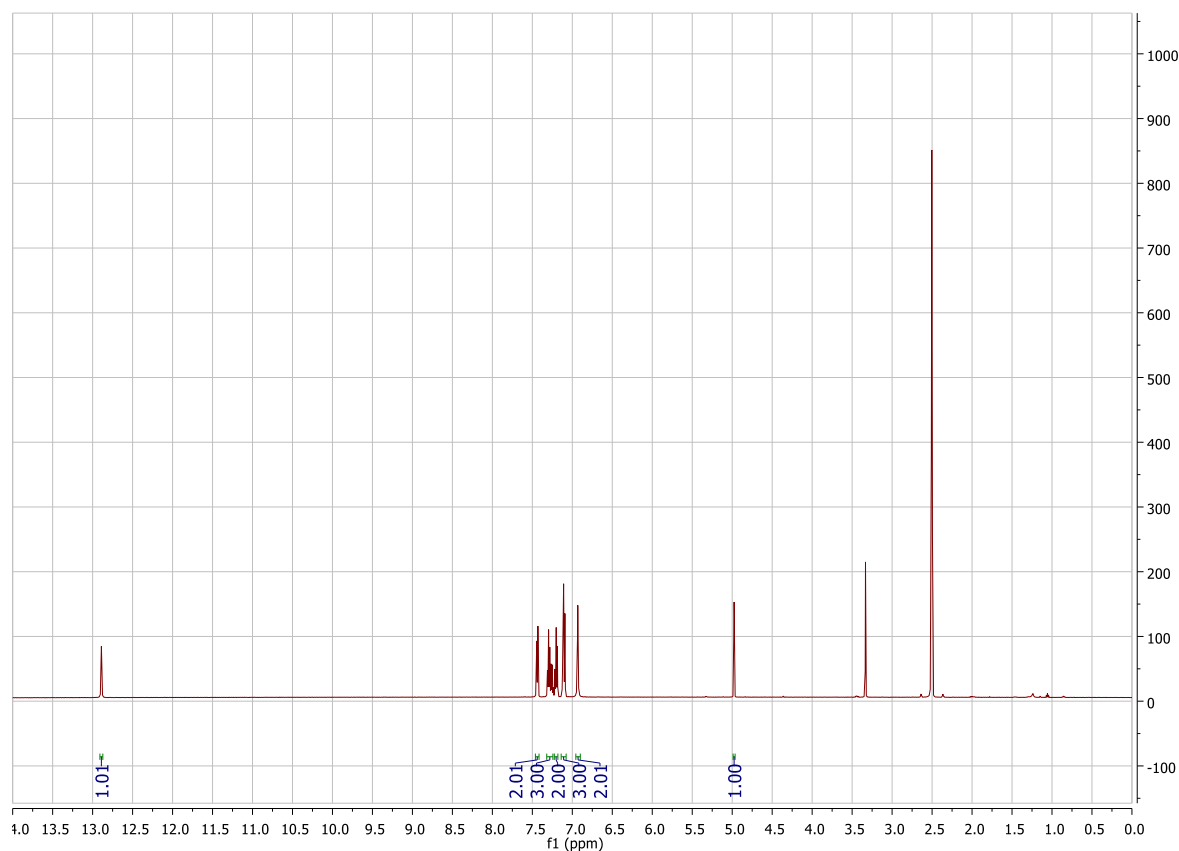



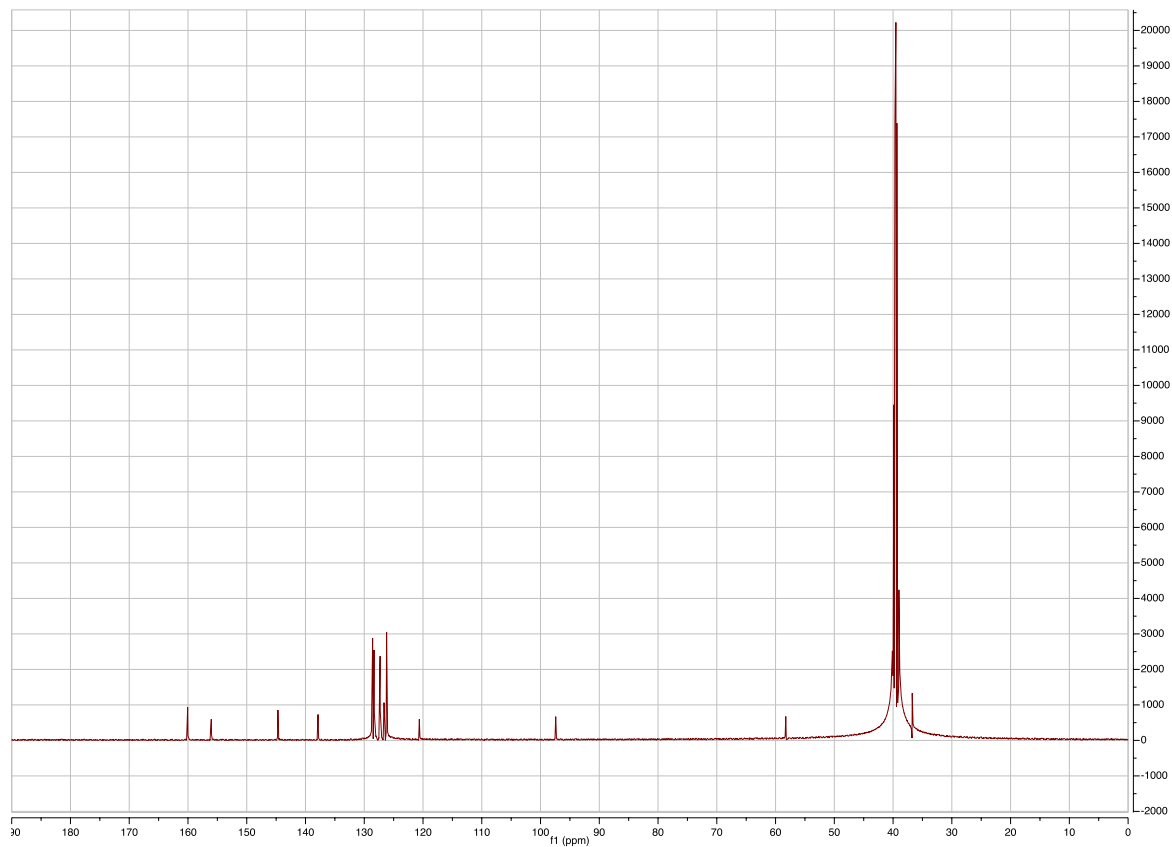

## 6-amino-4-(2,4-dimethylphenyl)-3-phenyl-1,4-dihydropyranopyrazole-5-carbonitrile (10i)

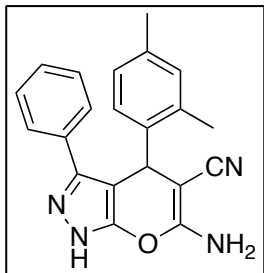

UPLC-UV: Rt = 1.74, 1.80 (2,4-dihydro tautomer);

UPLC-MS (ESI) calculated for C<sub>21</sub>H<sub>19</sub>N<sub>4</sub>O [M + H]<sup>+</sup>: *m/z* = 343.2, found *m/z* = 343.2;

<sup>1</sup>H NMR (400 MHz, DMSO-*d*<sub>6</sub>): δ = 12.83 (s, 1H, ArNH), 7.64 – 7.09 (m, 5H, ArH), 6.89 – 6.81 (m, 4H, 2 × ArH + 2 × ArNH<sub>2</sub>), 6.77 (d, *J* = 7.9, 1H, ArH), 5.15 (s, 1H, CHAr), 2.30 (s, 3H, ArCH<sub>3</sub>), 2.15 (s, 3H, ArCH<sub>3</sub>);

<sup>13</sup>C NMR (100 MHz, DMSO-*d*<sub>6</sub>): δ = 159.98, 156.26, 137.70, 135.27, 134.30, 130.99, 128.79, 128.51 (two overlapping signals), 128.27, 127.01, 126.07

(two overlapping signals), 120.63, 97.78, 57.81, 20.46 (two overlapping signals), 18.81.

3: UV Detector: TIC

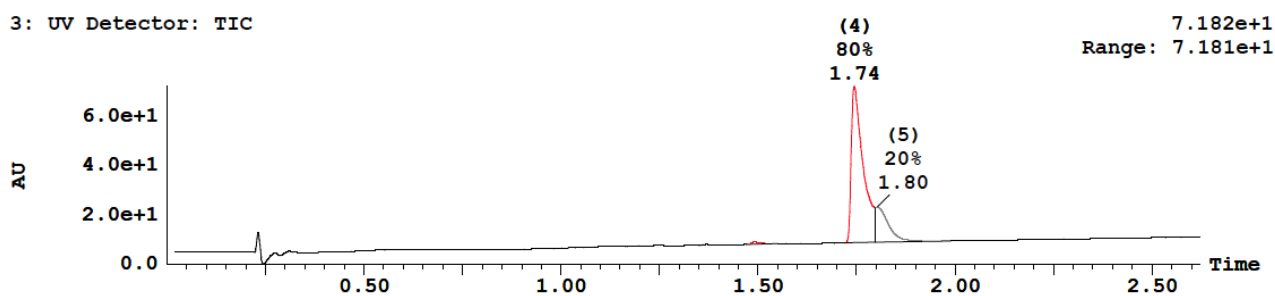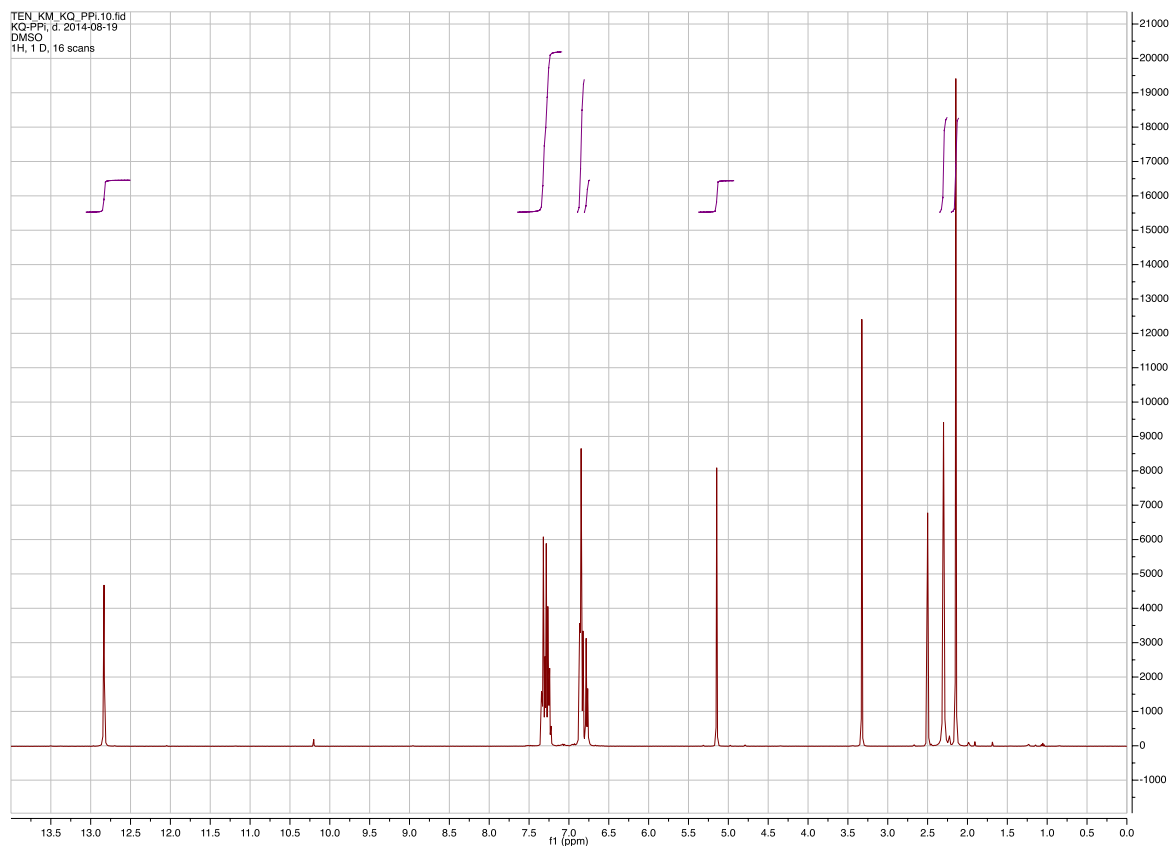

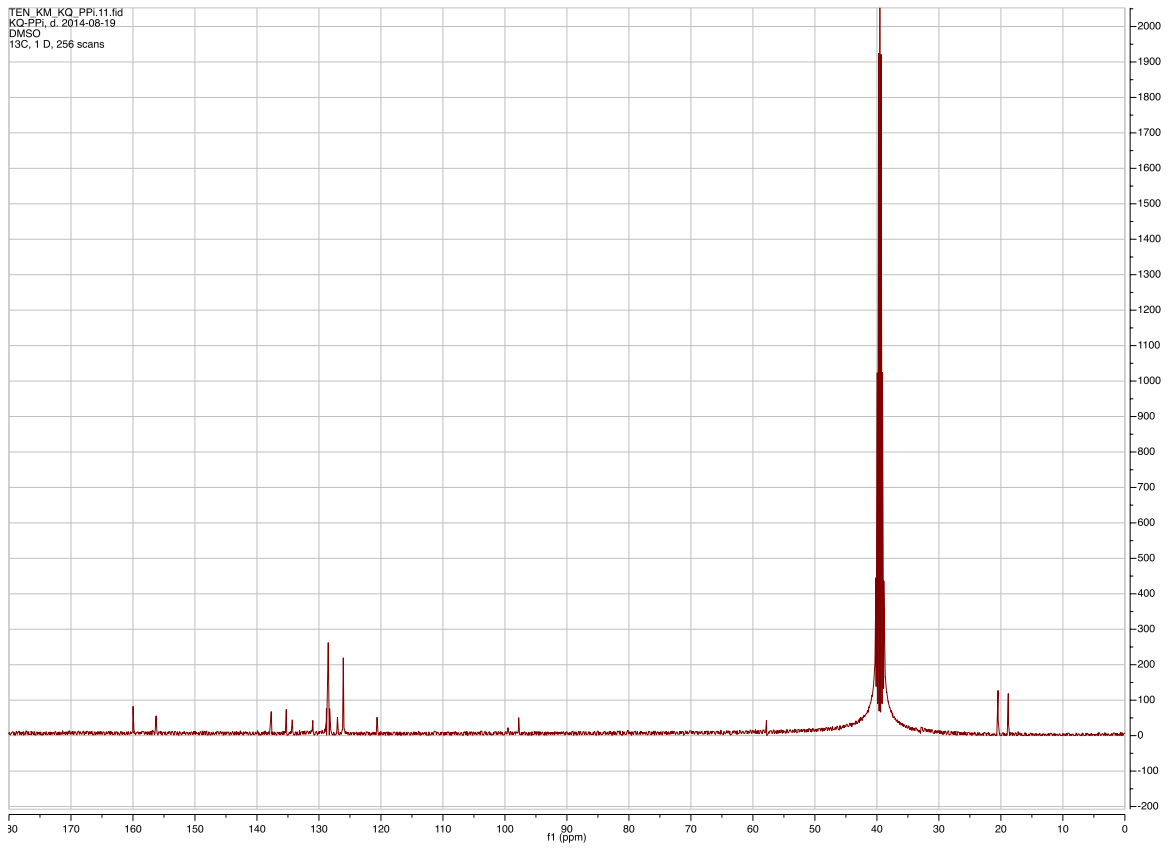

**6-amino-4-(4-methoxy-2,3-dimethylphenyl)-3-phenyl-1,4-dihydropyrano[2,3-c]pyrazole-5-carbonitrile (10j)**

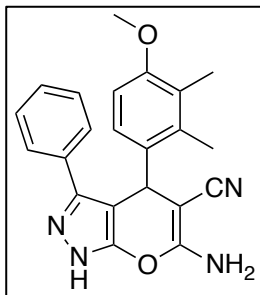

UPLC-UV: Rt = 1.73, 1.79 (2,4-dihydro tautomer);

UPLC-MS (ESI) calculated for C<sub>22</sub>H<sub>21</sub>N<sub>4</sub>O<sub>2</sub> [M + H]<sup>+</sup>: m/z = 373.2, found m/z = 373.2;

<sup>1</sup>H NMR (300 MHz, DMSO-*d*<sub>6</sub>): δ = 12.84 (s, 1H, ArNH), 7.94 – 7.01 (m, 5H, ArH), 6.78 – 6.72 (m, 4H, 2 × ArH + ArNH<sub>2</sub>), 5.23 (s, 1H, CHAr), 3.65 (s, 3H, ArOCH<sub>3</sub>), 2.26 (s, 3H, ArCH<sub>3</sub>), 2.05 (s, 3H, ArCH<sub>3</sub>);

<sup>13</sup>C NMR (75 MHz, DMSO-*d*<sub>6</sub>): δ = 159.87, 156.29, 155.25, 137.56, 134.50, 128.84, 128.51, 128.26, 126.74, 126.10, 123.54, 120.73, 109.81, 108.46,

98.46, 58.54, 55.17, 15.06, 12.06 (two overlapping signals).

3: UV Detector: TIC

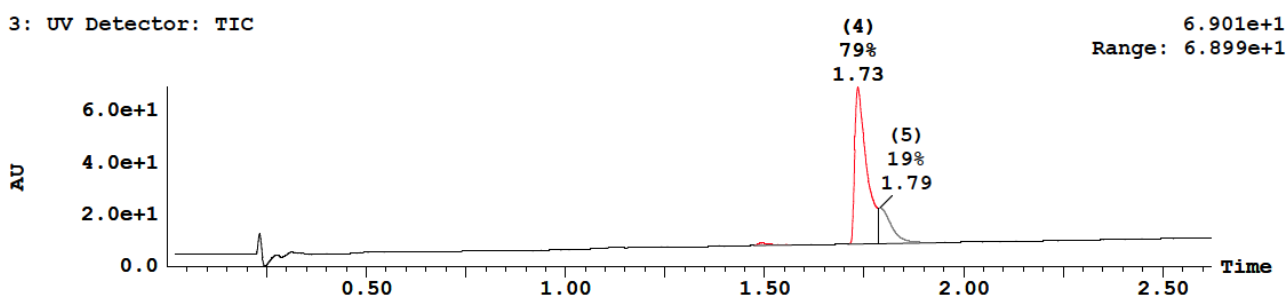

3801  
TEN-KQ-pyrano[2,3-c]pyrazole  
STANDARD 1H OBSERVE

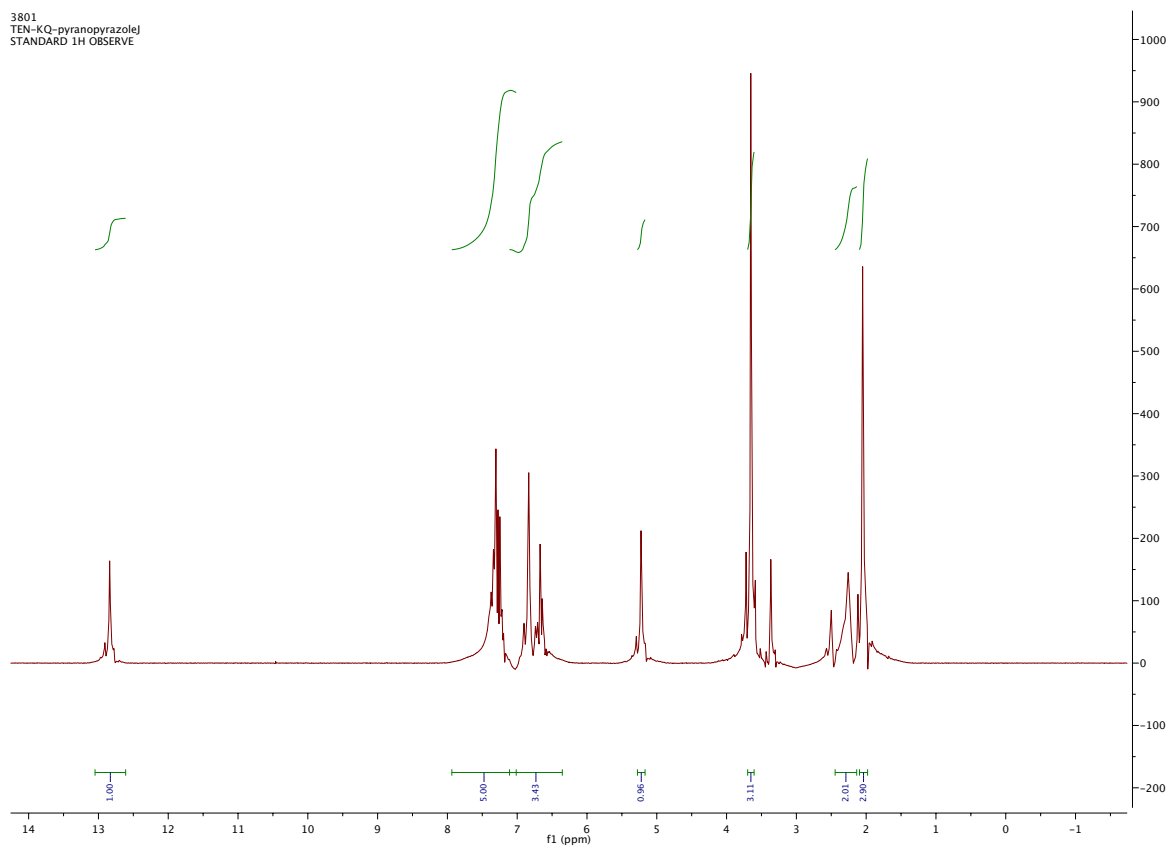

8802  
TEN-KG-pyrano[pyrazole]  
STANDARD 1H OBSERVE

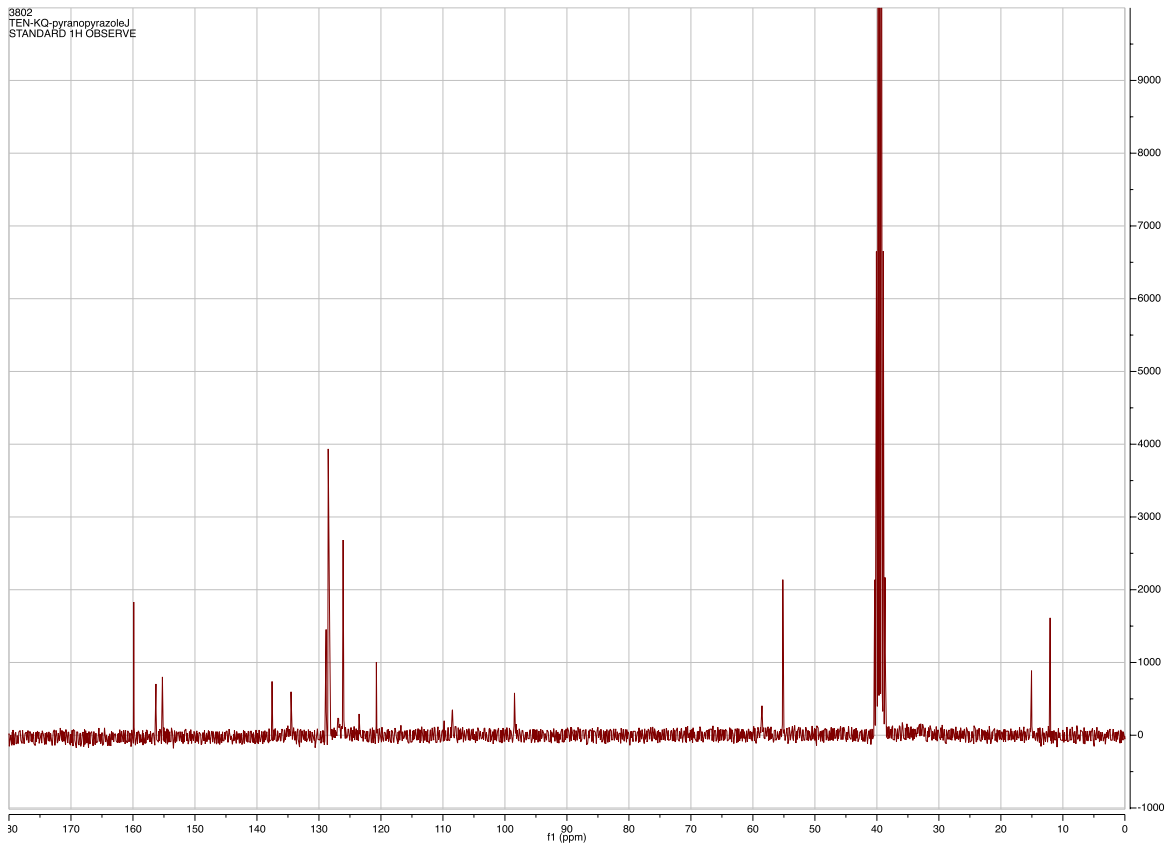

### 6-amino-4-(4-fluorophenyl)-3-phenyl-1,4-dihydropyrano[2,3-c]pyrazole-5-carbonitrile (10k)

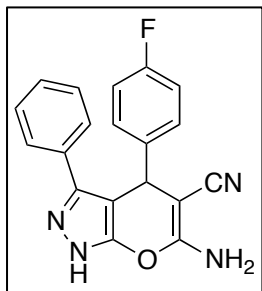

UPLC-UV:  $R_t = 1.58$ ;

UPLC-MS (ESI) calculated for  $C_{19}H_{14}FN_4O [M + H]^+$ :  $m/z = 333.1$ , found  $m/z = 333.1$ ;

$^1H$  NMR (400 MHz,  $DMSO-d_6$ ):  $\delta = 12.90$  (s, 1H, ArNH), 7.48 – 7.39 (m, 2H, 2  $\times$  ArH), 7.34 – 7.22 (m, 3H, 3  $\times$  ArH), 7.17 – 7.09 (m, 2H, 2  $\times$  ArH), 7.06 – 6.97 (m, 2H, 2  $\times$  ArH), 6.94 (s, 2H, ArNH<sub>2</sub>), 5.04 (s, 1H, CHAr);

$^{13}C$  NMR (100 MHz,  $DMSO-d_6$ ):  $\delta = 160.77$  (d,  $J = 241$  Hz), 160.02, 155.88, 140.80 (d,  $J = 3$  Hz), 137.98, 129.20 (d,  $J = 3$  Hz), 128.55, 128.52, 128.35,

126.25, 120.52, 115.02 (d,  $J = 21$  Hz), 97.27, 58.09, 35.91.

3: UV Detector: TIC

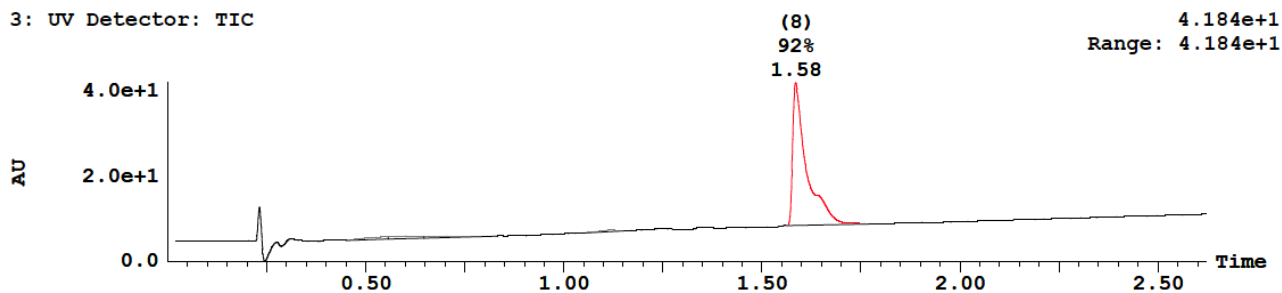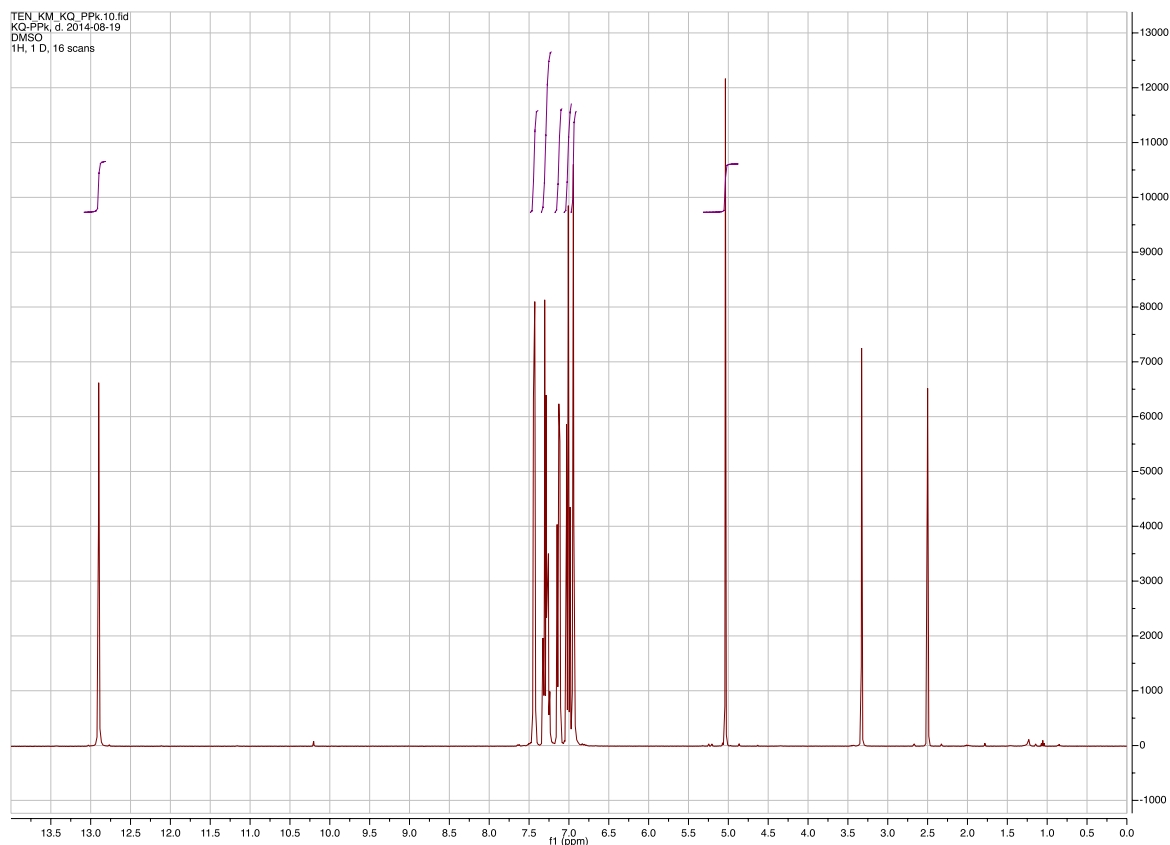

TEN\_KM\_KQ\_PPK:11.fid  
KQ\_PPK, d. 2014-08-19  
DMSO  
13C, 1 D, 256 scans

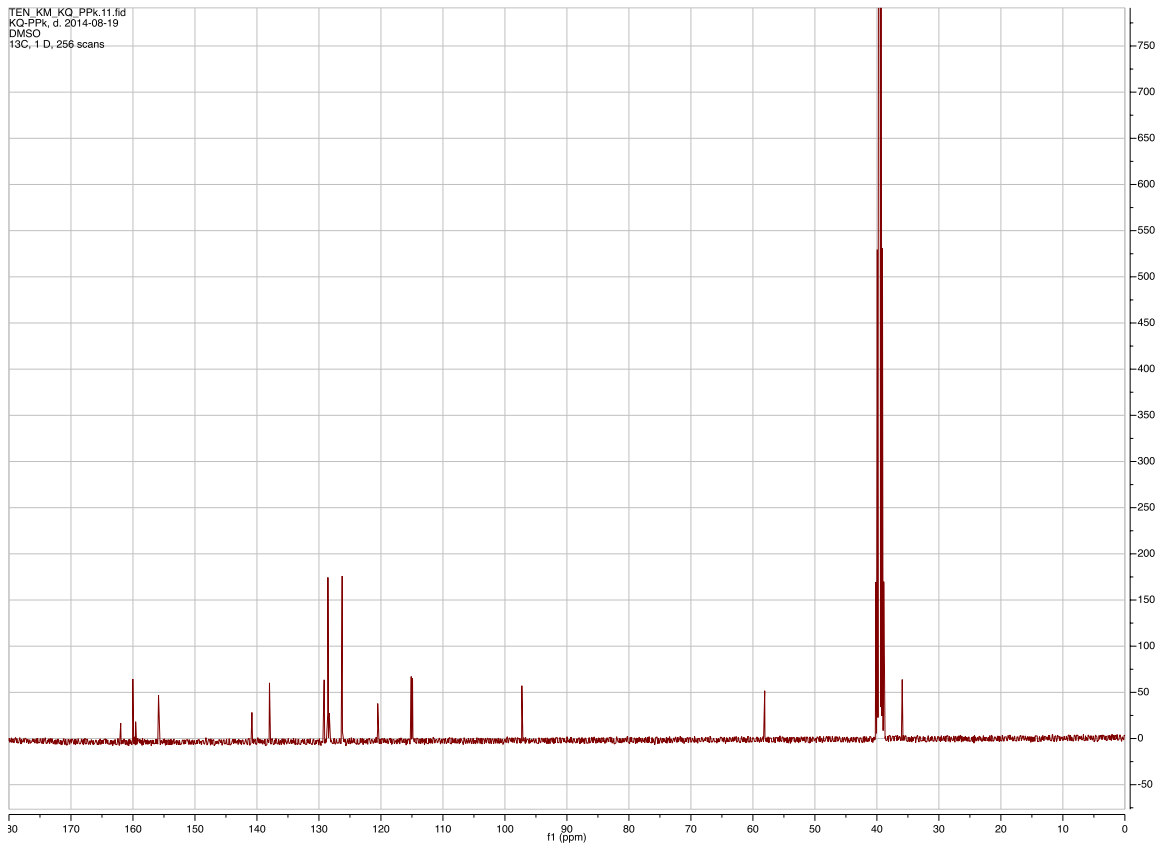

## 6-amino-3-phenyl-4-(*o*-tolyl)-1,4-dihydropyrano[2,3-*c*]pyrazole-5-carbonitrile (10l)

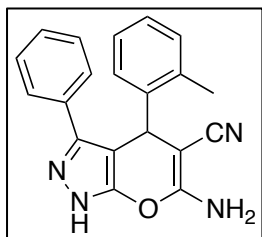

UPLC-UV: Rt = 1.64, 1.69 (2,4-dihydro tautomer);

UPLC-MS (ESI) calculated for C<sub>20</sub>H<sub>17</sub>N<sub>4</sub>O [M + H]<sup>+</sup>: *m/z* = 329.1, found *m/z* = 329.1;

<sup>1</sup>H NMR (400 MHz, DMSO-*d*<sub>6</sub>): δ = 12.84 (s, 1H, ArNH), 7.33 – 7.20 (m, 6H, 5 × ArH), 7.06 – 6.88 (m, 3H, 3 × ArH), 6.91 (d, *J* = 2.2 Hz, 1H, ArH), 6.88 (s, 2H, ArNH<sub>2</sub>), 5.19 (s, 1H, CHAr), 2.33 (s, 3H, ArCH<sub>3</sub>);

<sup>13</sup>C NMR (100 MHz, DMSO-*d*<sub>6</sub>): δ = 160.09, 156.23, 142.67, 137.84,

134.59, 130.36, 128.75, 128.59, 128.46, 128.30, 126.46, 126.31, 126.14, 120.59, 97.70, 57.55, 33.20, 18.88.

3: UV Detector: TIC

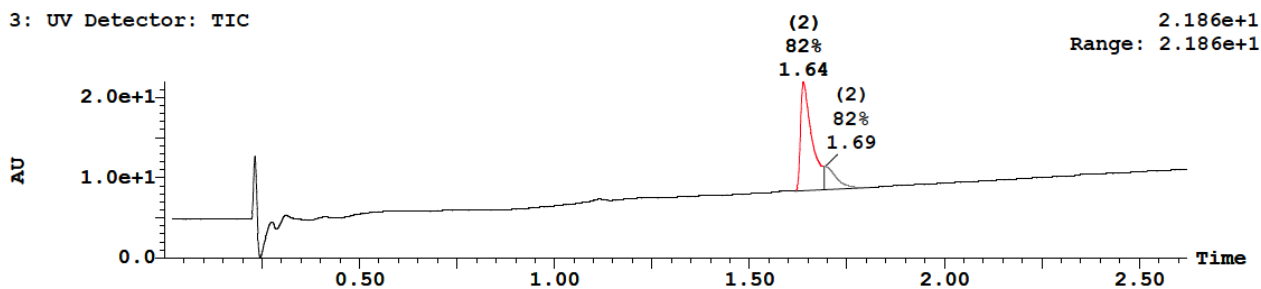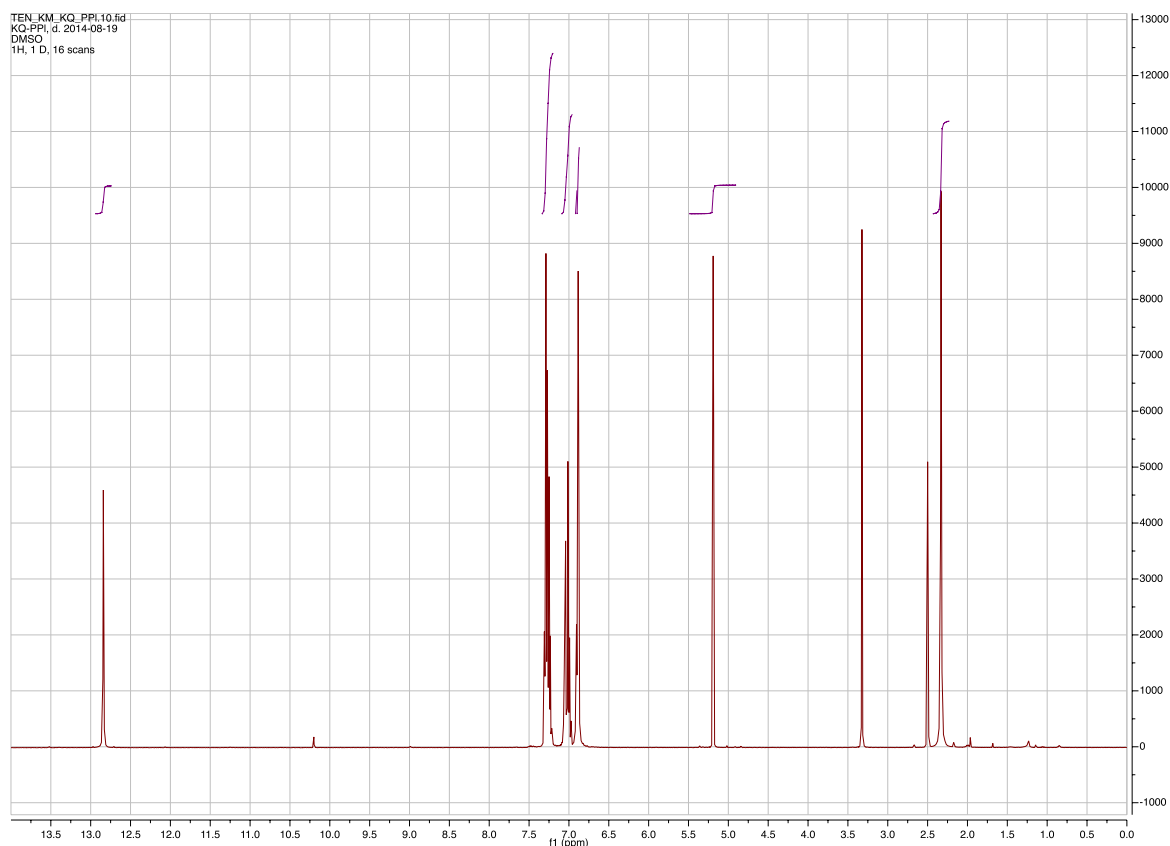



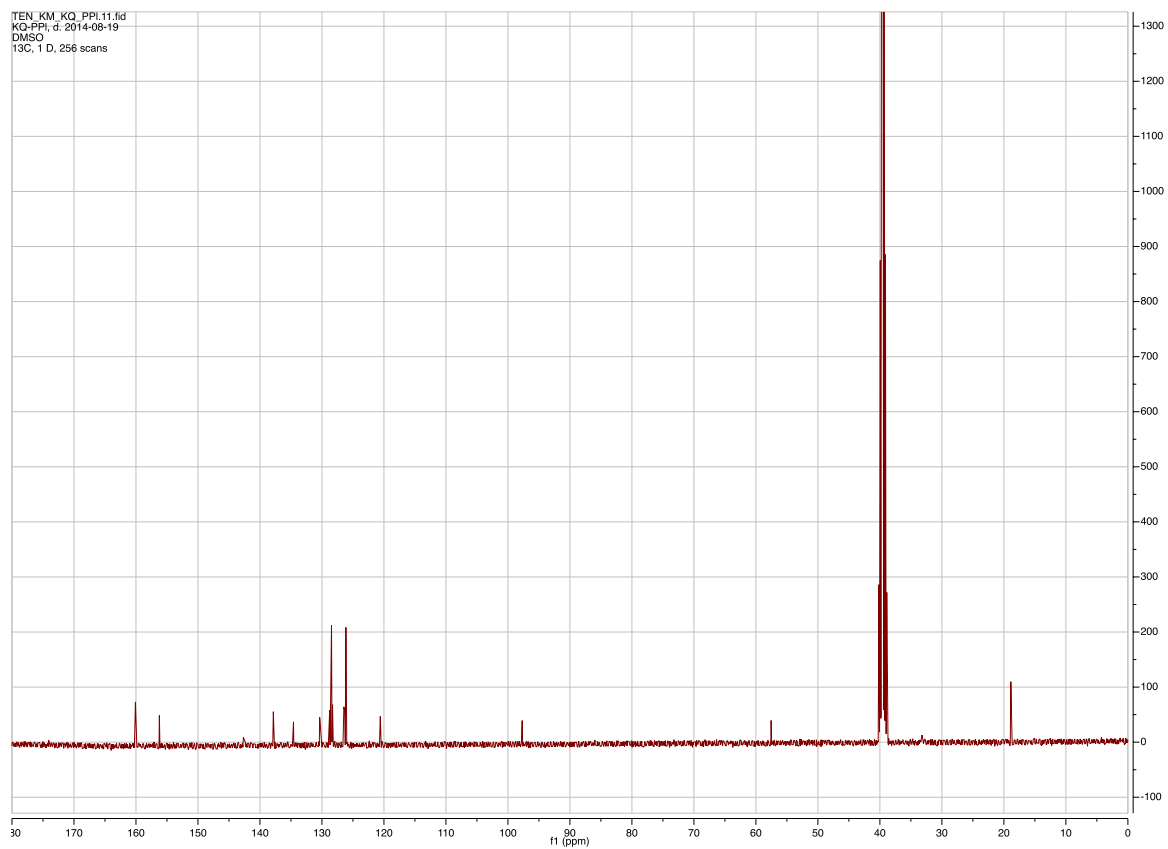

**6-amino-4-(2,4-dimethylphenyl)-3-propyl-1,4-dihydropyrano[2,3-c]pyrazole-5-carbonitrile (10m)**

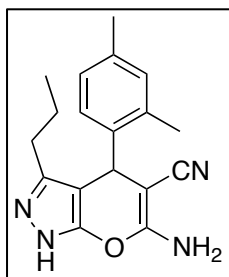

UPLC:  $R_t = 1.71, 1.77$  (2,4-dihydro tautomer);

UPLC-MS (ESI) calculated for  $C_{18}H_{21}N_4O$   $[M + H]^+$ :  $m/z = 309.2$ , found  $m/z = 309.2$ ;

$^1H$  NMR (300 MHz,  $DMSO-d_6$ ):  $\delta = 12.07$  (s, 1H, ArNH), 6.96 – 6.85 (m, 3H, ArH), 6.80 (s, 2H, ArNH<sub>2</sub>), 4.83 (s, 1H, CHAr), 2.20 (s, 6H, 2 × ArCH<sub>3</sub>), 2.17 – 1.88 (m, 2H, CH<sub>2</sub>), 1.29 – 0.91 (m, 2H, CH<sub>2</sub>), 0.57 (t,  $J = 7.3$  Hz, 3H, CH<sub>3</sub>);

$^{13}C$  NMR (75 MHz,  $DMSO-d_6$ ):  $\delta = 160.59, 155.00, 139.54, 139.20, 135.51, 134.73, 131.21, 129.03, 126.86, 120.78, 97.20, 56.94, 26.28, 20.98, 20.57,$

18.78, 13.36 (two overlapping aliphatic signals).

3: UV Detector: TIC

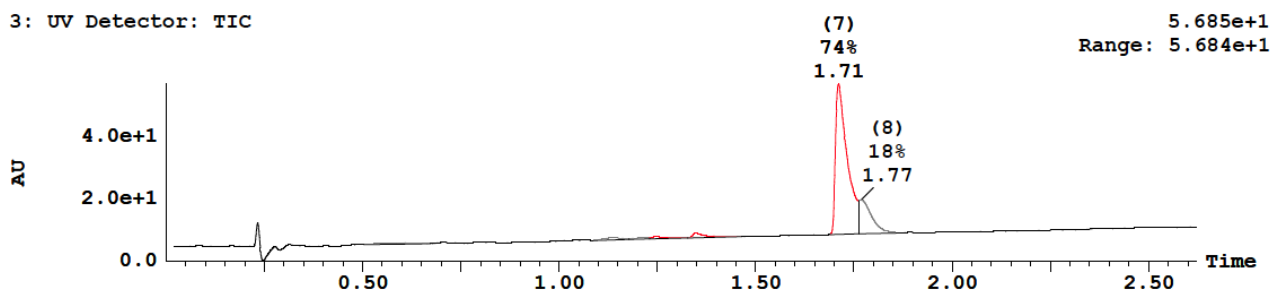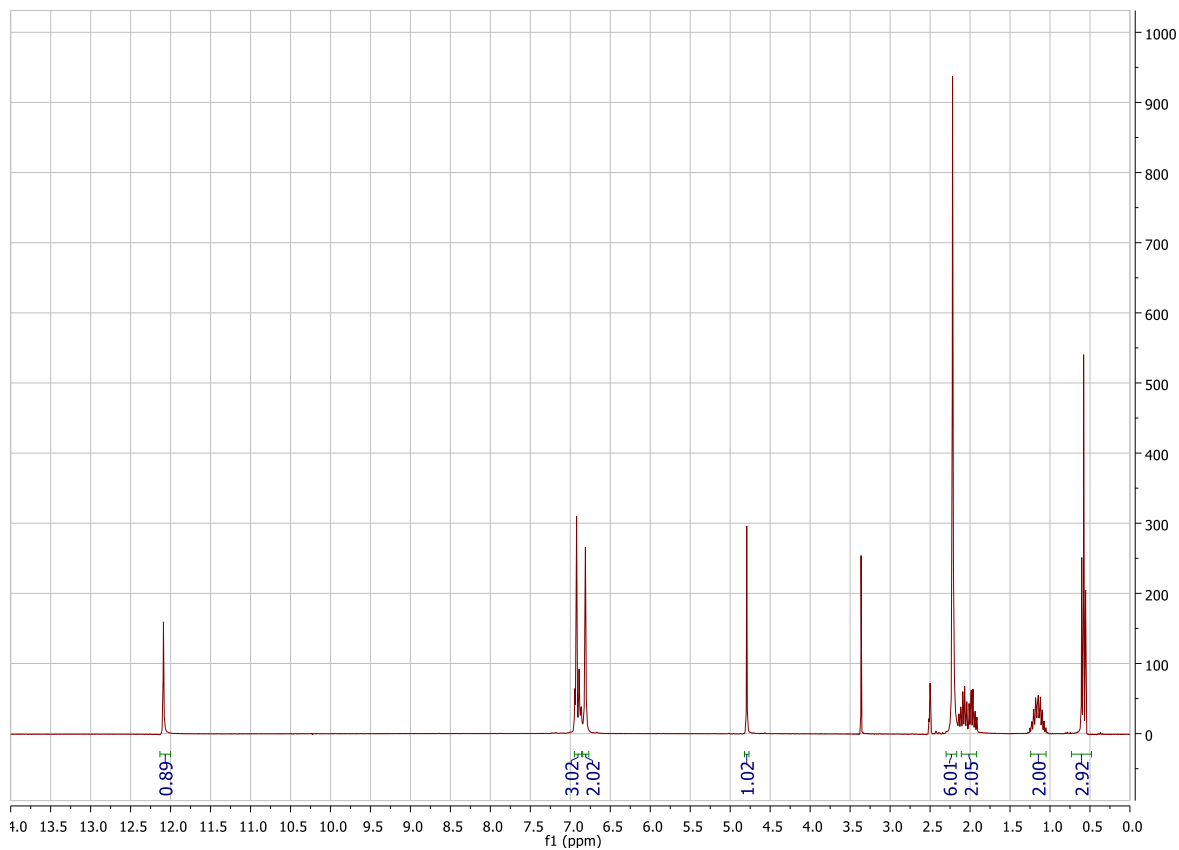

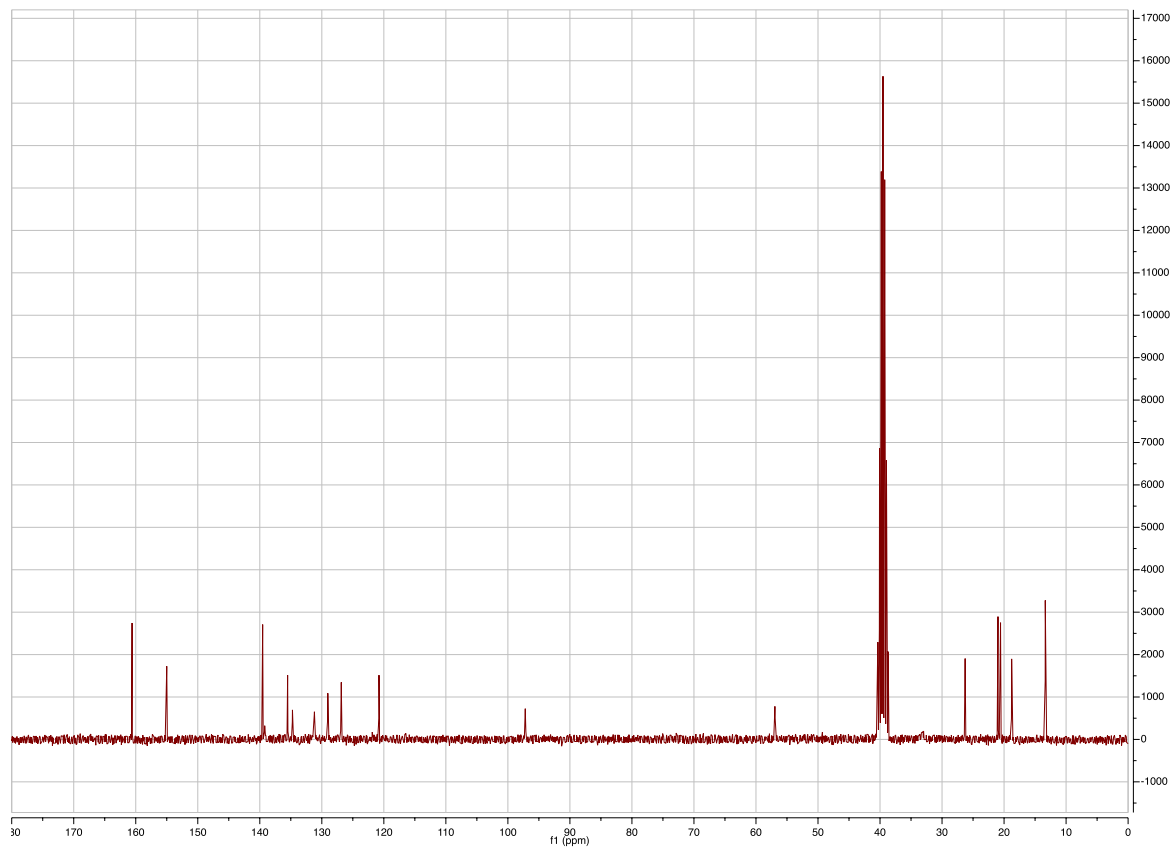

### 6-amino-4-(4-chlorophenyl)-3-propyl-1,4-dihydropyrano[2,3-c]pyrazole-5-carbonitrile (10n)

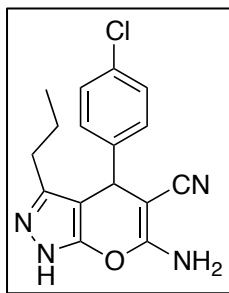

UPLC: Rt = 1.66, 1.71 (2,4-dihydro tautomer);

UPLC-MS (ESI) calculated for C<sub>16</sub>H<sub>16</sub>ClN<sub>4</sub>O [M + H]<sup>+</sup>: *m/z* = 315.1 (<sup>35</sup>Cl), 317.1 (<sup>37</sup>Cl) found *m/z* = 315.1 (100 %), 317.1 (30 %);

<sup>1</sup>H NMR (400 MHz, DMSO-*d*<sub>6</sub>): δ = 12.15 (s, 1H, ArNH), 7.37 (d, *J* = 8.4 Hz, 2H, 2 × ArH), 7.19 (d, *J* = 8.4 Hz, 2H, 2 × ArH), 6.91 (s, 2H, ArNH<sub>2</sub>), 4.63 (s, 1H, CHAr), 2.17 (ddd, *J* = 15.0, 8.5, 6.7 Hz, 1H, ArCHHCH<sub>2</sub>), 2.05 (ddd, *J* = 14.7, 8.5, 6.4 Hz, 1H, ArCHHCH<sub>2</sub>), 1.33-1.06 (m, 2H, CH<sub>2</sub>CH<sub>2</sub>CH<sub>3</sub>), 0.63 (t, *J* = 7.3 Hz, 3H CH<sub>2</sub>CH<sub>3</sub>);

<sup>13</sup>C NMR (100 MHz, DMSO-*d*<sub>6</sub>): δ = 160.75, 154.59, 143.91, 139.82, 131.23, 129.41, 128.40, 120.63, 96.90, 56.97, 35.72, 26.19, 20.95, 13.31.

3: UV Detector: TIC

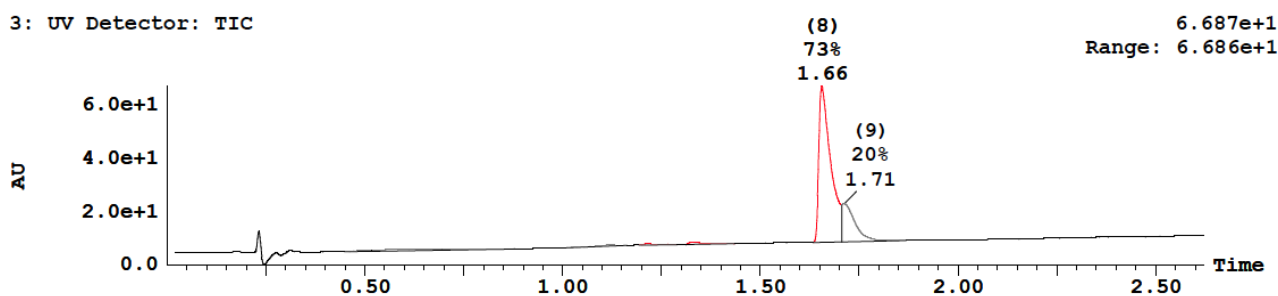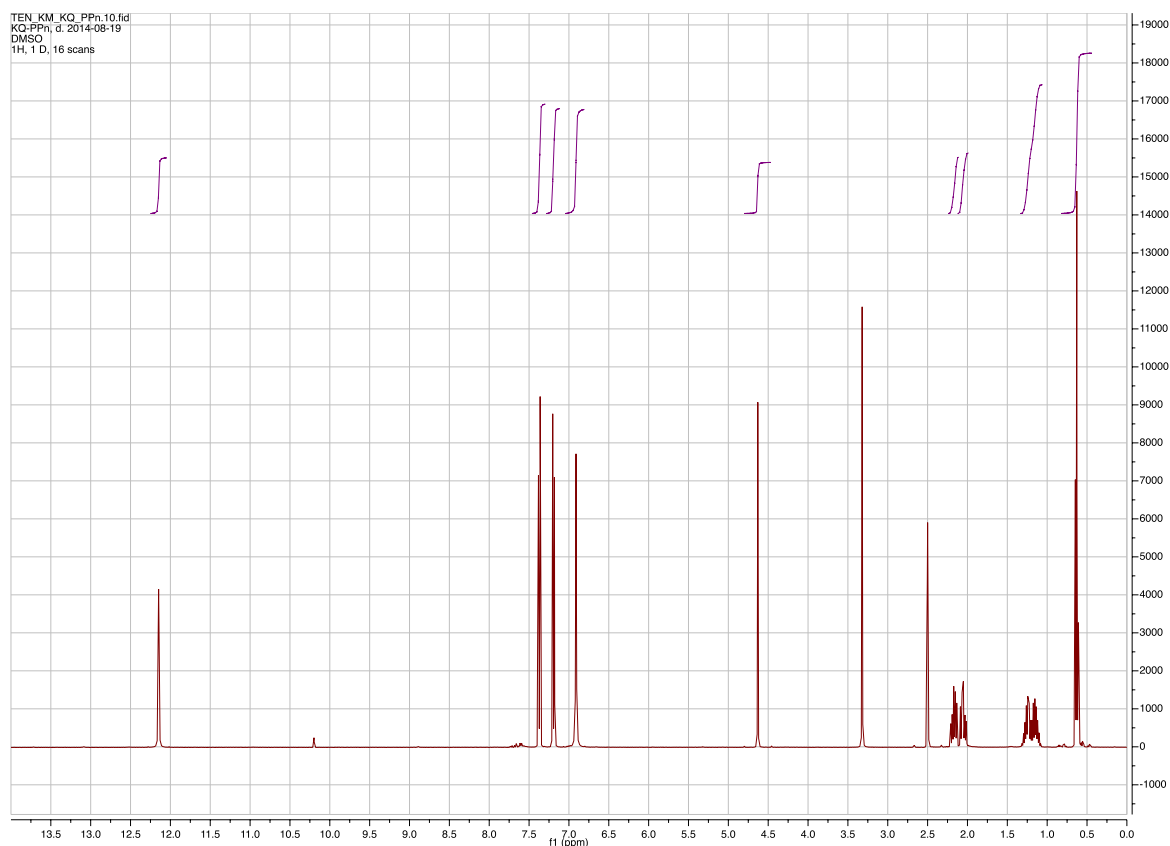

TEN\_KM\_KQ\_PPn.11.fid  
KQ\_PPn, d. 2014-08-19  
DMSO  
13C, T D, 256 scans

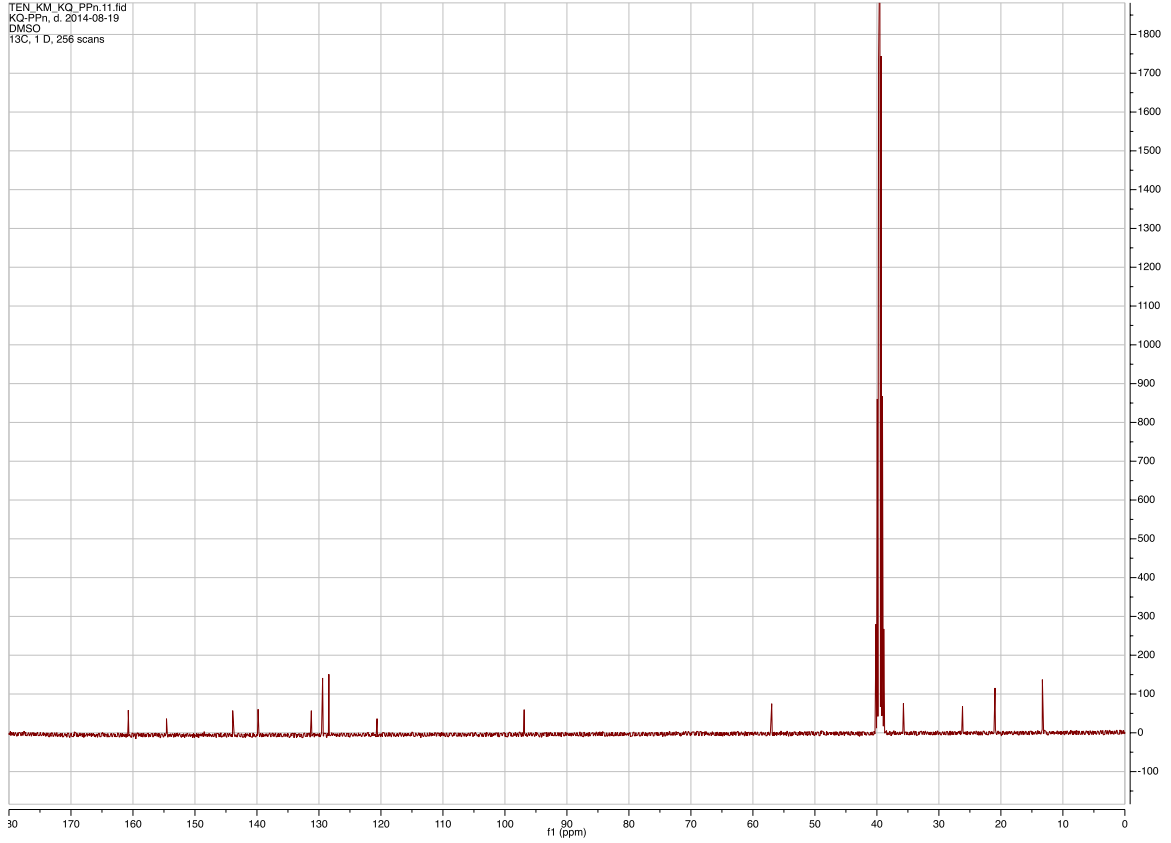

## 6-amino-4-phenyl-3-propyl-1,4-dihydropyrano[2,3-c]pyrazole-5-carbonitrile (10o)

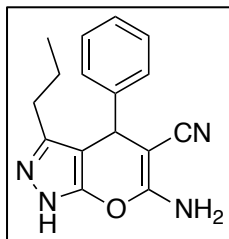

UPLC: Rt = 1.50, 1.56 (2,4-dihydro tautomer);

UPLC-MS (ESI) calculated for  $C_{16}H_{17}N_4O$   $[M + H]^+$ :  $m/z = 281.1$ , found  $m/z = 281.1$ ;

$^1H$  NMR (400 MHz,  $DMSO-d_6$ ):  $\delta = 12.10$  (s, 1H, ArNH), 7.36-7.27 (m, 2H,  $2 \times$  ArH), 7.25 – 7.19 (m, 1H, ArH), 7.18 – 7.13 (m, 2H,  $2 \times$  ArH), 6.85 (s, 2H, ArNH<sub>2</sub>), 4.58 (s, 1H, CHAr), 2.16 (ddd,  $J = 14.9, 8.6, 6.6$  Hz, 1H, ArCHHCH<sub>2</sub>), 2.04 (ddd,  $J = 14.7, 8.6, 6.4$  Hz, 1H, ArCHHCH<sub>2</sub>), 1.30-1.03 (m,

2H, CH<sub>2</sub>CH<sub>2</sub>CH<sub>3</sub>), 0.61 (t,  $J = 7.3$  Hz, 3H CH<sub>2</sub>CH<sub>3</sub>);

$^{13}C$  NMR (100 MHz,  $DMSO-d_6$ ):  $\delta = 160.71, 154.63, 144.87, 139.76, 128.39, 127.52, 126.75, 120.77, 97.33, 57.39, 36.44, 26.21, 20.93, 13.31$ .

3: UV Detector: TIC

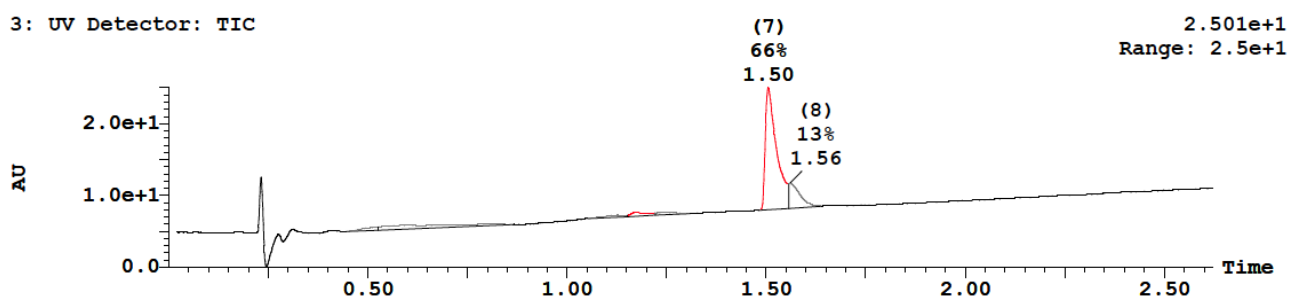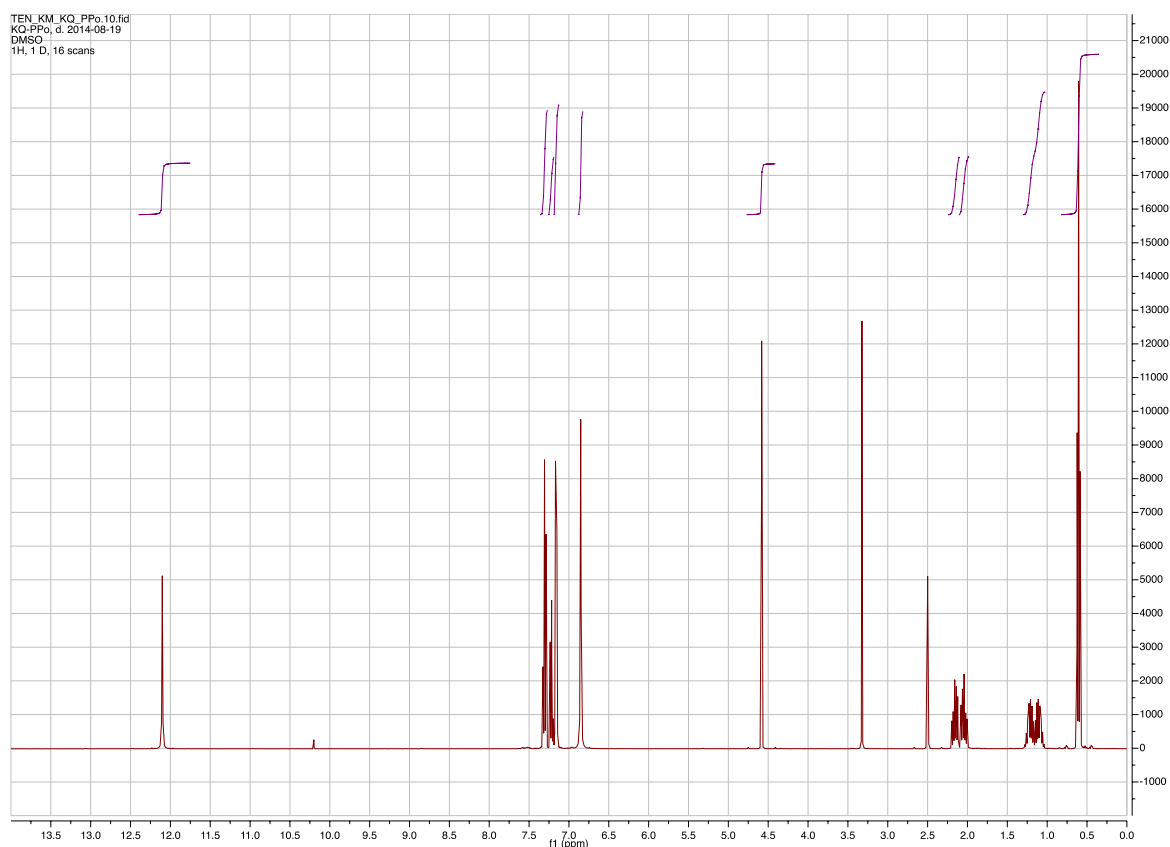

TEN\_KM\_KQ\_PP0.11.fid  
KQ\_PP0.d. 2014-08-19  
DMSO  
13C, 1 D, 256 scans

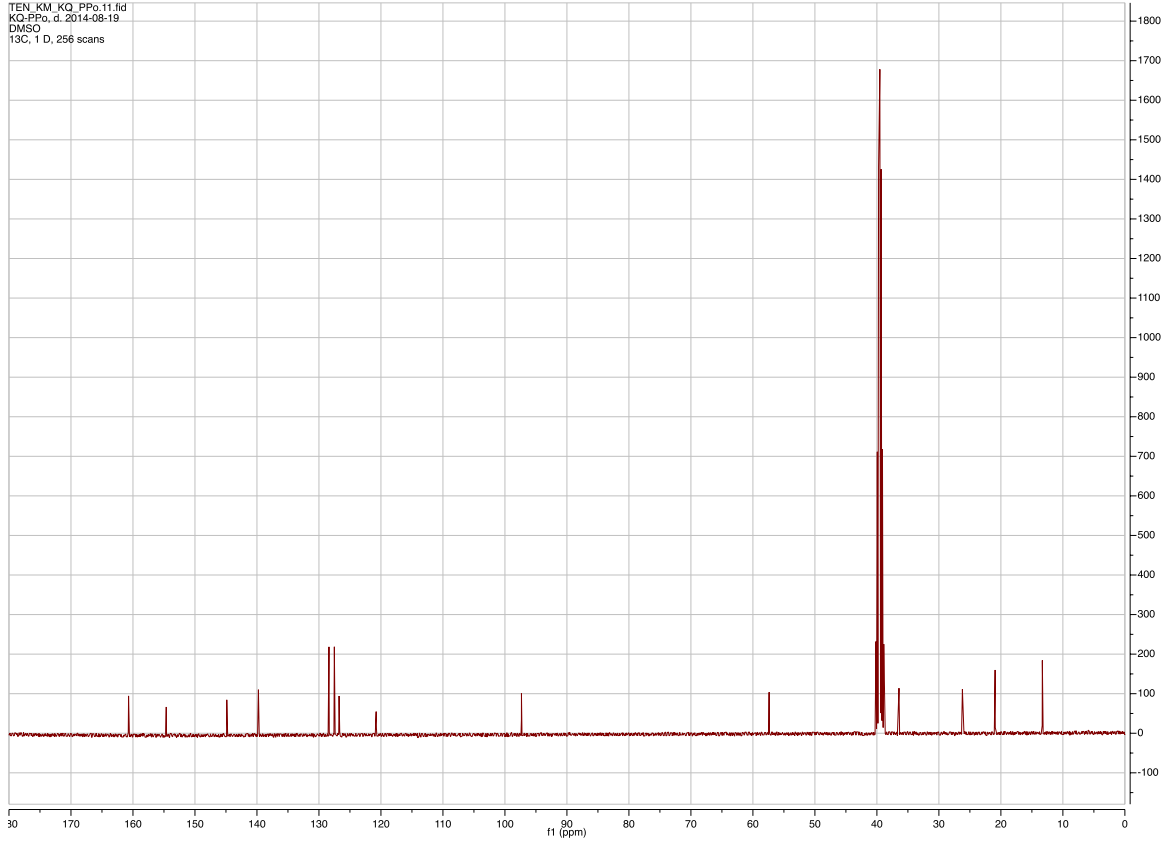

**6-amino-4-(2,5-dimethylphenyl)-3-propyl-1,4-dihydropyrano[2,3-c]pyrazole-5-carbonitrile (10p)**

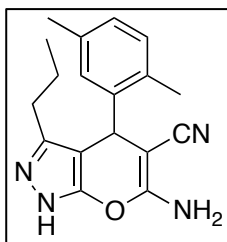

UPLC: Rt = 1.69, 1.75 (2,4-dihydro tautomer);

UPLC-MS (ESI) calculated for C<sub>18</sub>H<sub>21</sub>N<sub>4</sub>O [M + H]<sup>+</sup>: *m/z* = 309.2, found *m/z* = 309.2;

<sup>1</sup>H NMR (300 MHz, DMSO-*d*<sub>6</sub>): δ = 12.09 (s, 1H, ArNH), 7.35-6.45 (m, 5H, 3 × ArH + ArNH<sub>2</sub>), 4.79 (s, 1H, CHAr), 2.20-1.75 (m, 2H, ArCH<sub>2</sub>), 2.18 (s, 6H, 2 × ArCH<sub>3</sub>), 1.39-0.83 (m, 2H, CH<sub>2</sub>CH<sub>2</sub>CH<sub>3</sub>), 0.53 (t, *J* = 7.7 Hz, 3H, CH<sub>2</sub>CH<sub>3</sub>);

<sup>13</sup>C NMR (75 MHz, DMSO-*d*<sub>6</sub>): δ = 160.65, 155.00, 142.08, 139.57, 135.00, 131.89, 130.50, 129.45, 127.42, 127.35, 120.80, 97.21, 56.84, 26.28, 20.94, 20.66, 18.46, 13.31(two overlapping).

3: UV Detector: TIC

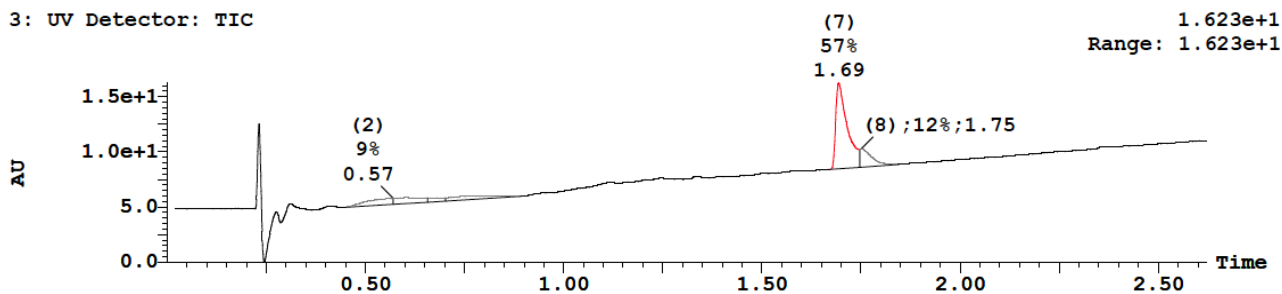

4001  
TEN-KQ-pyrano[2,3-c]pyrazoleP  
STANDARD 1H OBSERVE

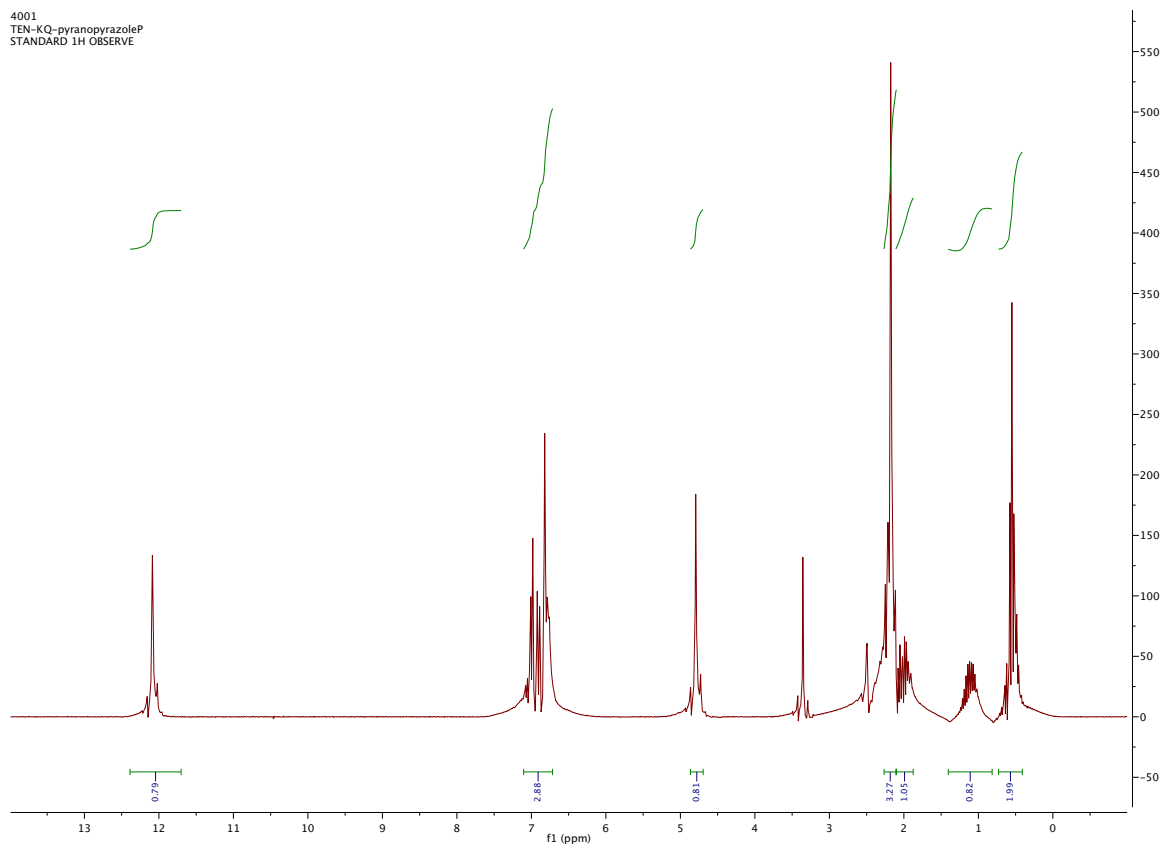



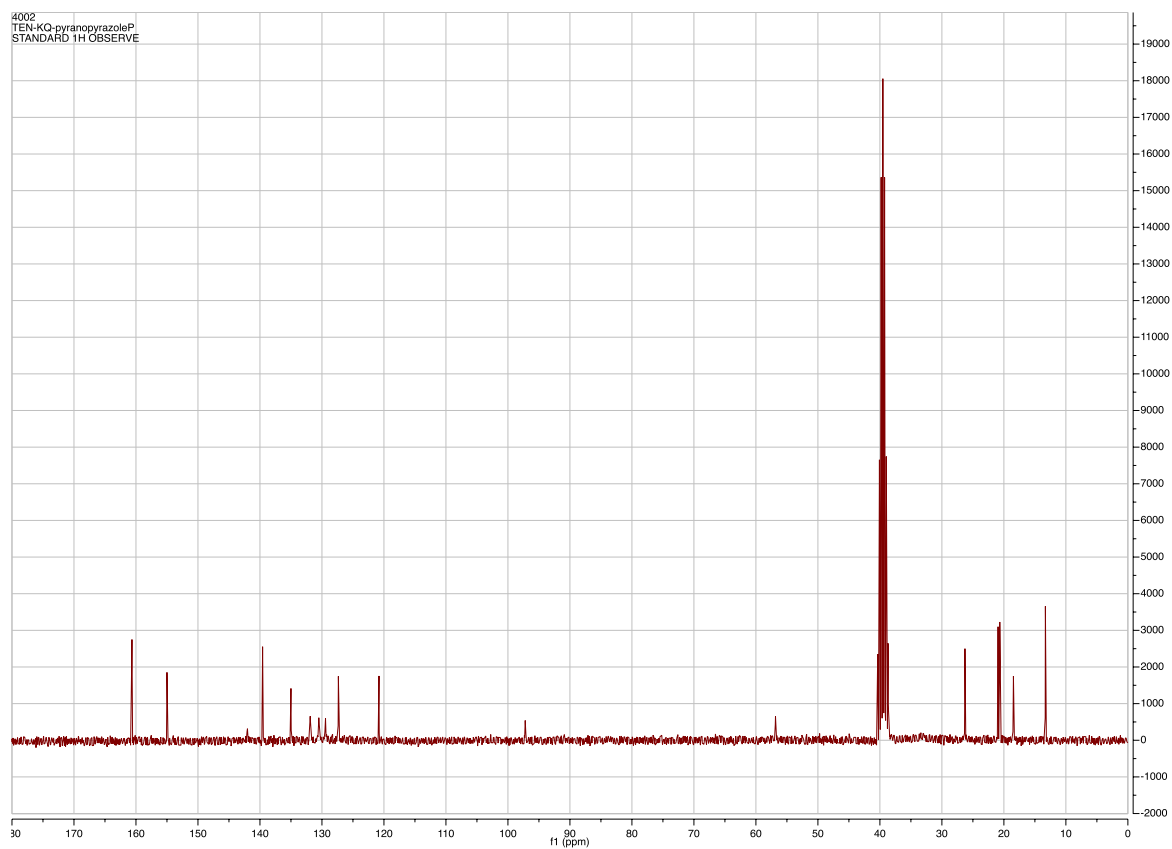

**6-amino-4-(5-((3,4-dichlorophenoxy)methyl)-2,4-dimethylphenyl)-3-methyl-1,4-dihydropyranopyrazole-5-carbonitrile (10q)**

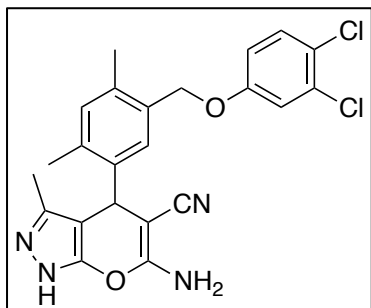

UPLC: Rt = 2.09, 2.15 (2,4-dihydro tautomer);

UPLC-MS (ESI) calculated for  $C_{23}H_{20}Cl_2N_4O_2$   $[M + H]^+$ :  $m/z$  = 455.1 ( $^{35}Cl$ ), 457.1 (1 x  $^{35}Cl$ , 1 x  $^{37}Cl$ ), found  $m/z$  = 455.1 (100 %), 457.1 (64 %);

$^1H$  NMR (300 MHz,  $DMSO-d_6$ ):  $\delta$  = 12.06 (s, 1H, ArNH), 7.51 (m, 1H, ArH), 7.29 (m, 1H, ArH), 7.00 (m, 3H, ArH), 6.83 (m, 2H, ArNH<sub>2</sub>), 5.02 (s, 2H, ArCH<sub>2</sub>OAr), 4.80 (s, 1H, CHAr), 2.23 (s, 6H, 2 x ArCH<sub>3</sub>), 1.64 (s, 3H ArCH<sub>3</sub>);

$^{13}C$  NMR (75 MHz,  $DMSO-d_6$ ):  $\delta$  = 160.74, 157.84, 155.06, 135.31, 135.24, 132.54, 132.03, 131.99, 131.55, 130.86, 129.87, 129.83, 122.51, 120.79, 116.77, 115.95, 97.43, 68.93, 56.74, 40.35, 18.56, 18.04 (two overlapping), 9.59.

3: UV Detector: TIC

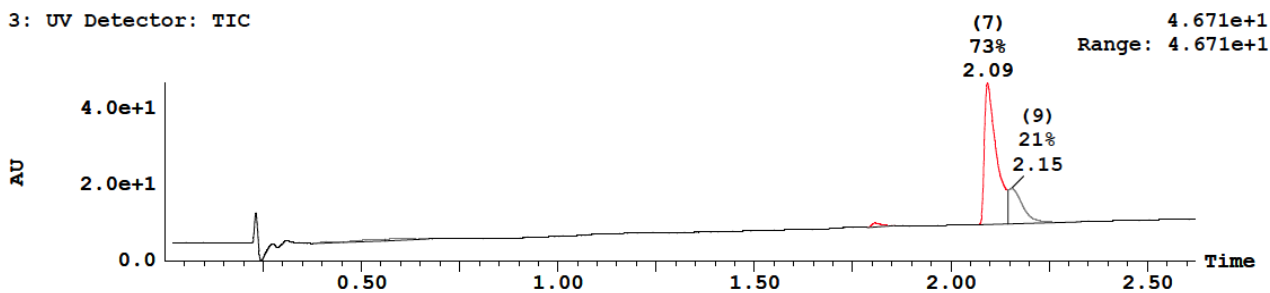

4101  
TEN-KQ-pyranopyrazoleQ  
STANDARD 1H OBSERVE

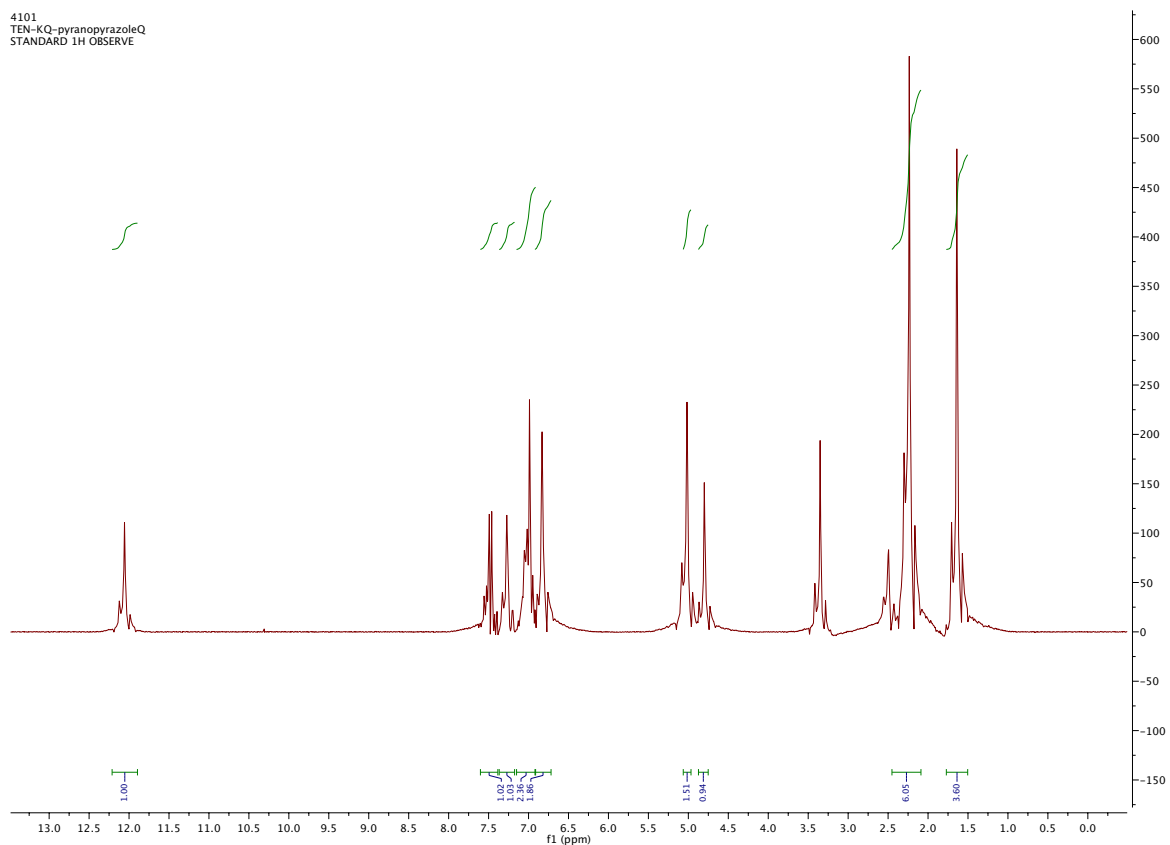

4102  
TEN-KQ-pyranopyrazoleQ  
STANDARD 1H OBSERVE

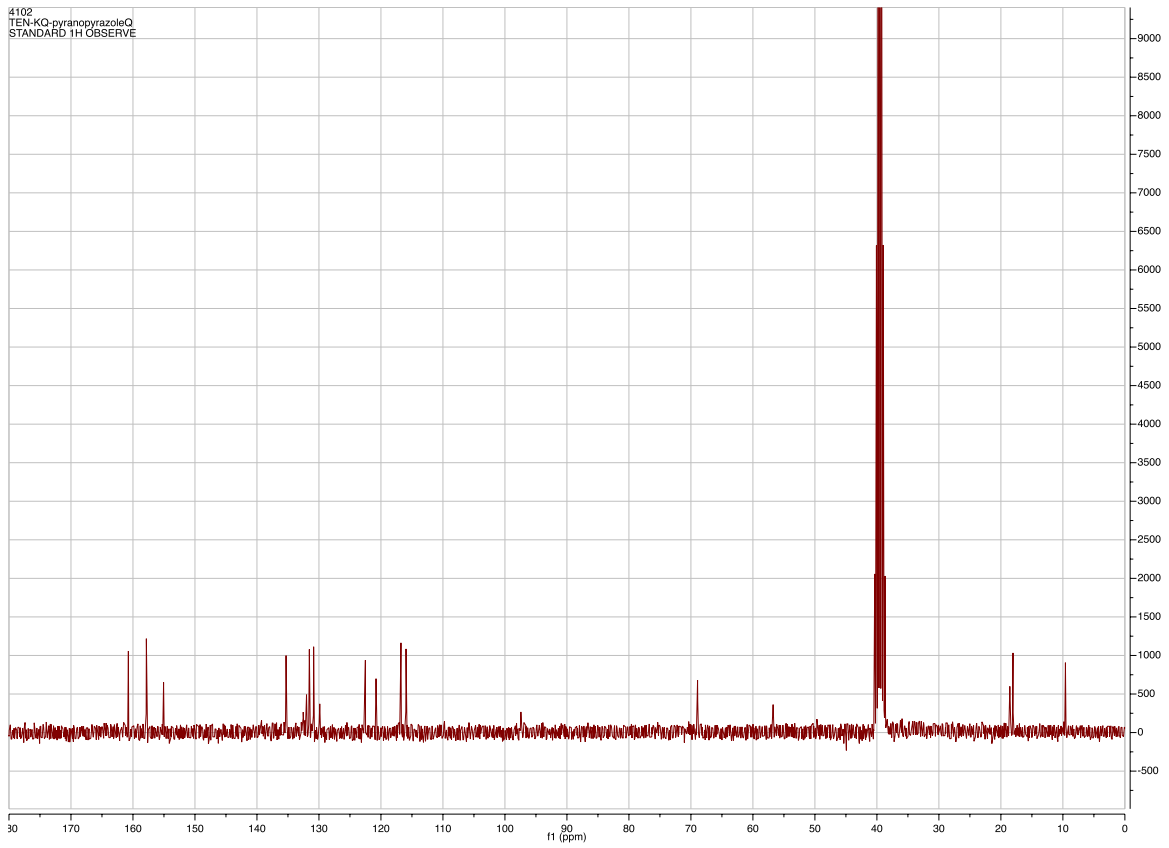

**6-amino-4-(2,4-dimethyl-5-(phenoxy)methyl)phenyl)-3-methyl-1,4-dihydropyranopyrazole[2,3-c]pyrazole-5-carbonitrile (10r)**

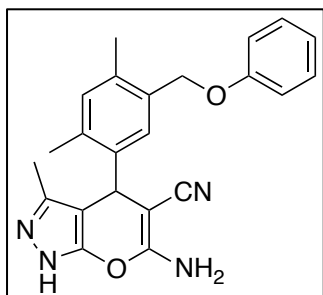

UPLC: Rt = 1.82, 1.88 (2,4-dihydro tautomer);

UPLC-MS (ESI) calculated for  $C_{23}H_{23}N_4O_2 [M + H]^+$ :  $m/z = 387.18$ ,  
found  $m/z = 387.2$ ;

$^1H$  NMR (300 MHz, DMSO- $d_6$ ):  $\delta = 12.06$  (s, 1H, ArNH), 7.38-7.19 (m, 3H, ArH), 7.14 – 6.87 (m, 4H, ArH), 6.83 (s, 2H, ArNH $_2$ ), 4.97 (s, 2H, ArCH $_2$ OAr), 4.81 (s, 1H, CHAr), 2.25 (s, 6H 2  $\times$  ArCH $_3$ ), 1.64 (s, 3H ArCH $_3$ );

$^{13}C$  NMR (75 MHz, DMSO- $d_6$ ):  $\delta = 160.74, 158.38, 155.07, 139.21, 135.34, 135.03, 134.83, 132.75, 132.44, 129.72, 129.41, 120.81, 120.67, 114.86, 97.38, 68.04, 56.80, 18.55, 18.04$  (two overlapping), 9.62.

3: UV Detector: TIC

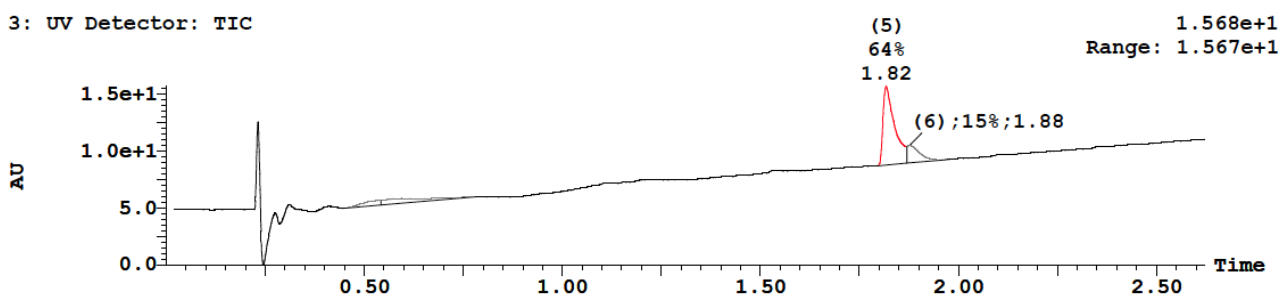

4201  
TEN-KQ-pyranopyrazoleR  
STANDARD 1H OBSERVE

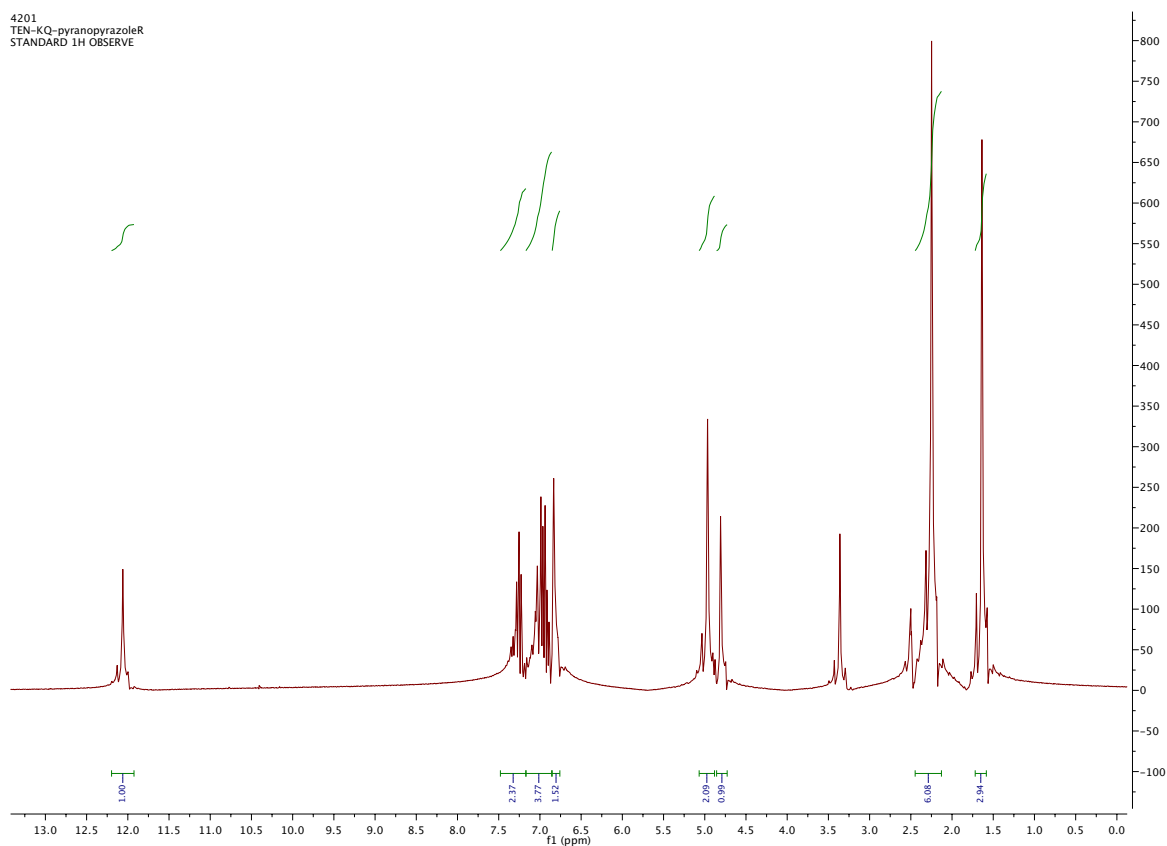

4202  
TEN-KQ-pyranopyrazoleF  
STANDARD 1H OBSERVE

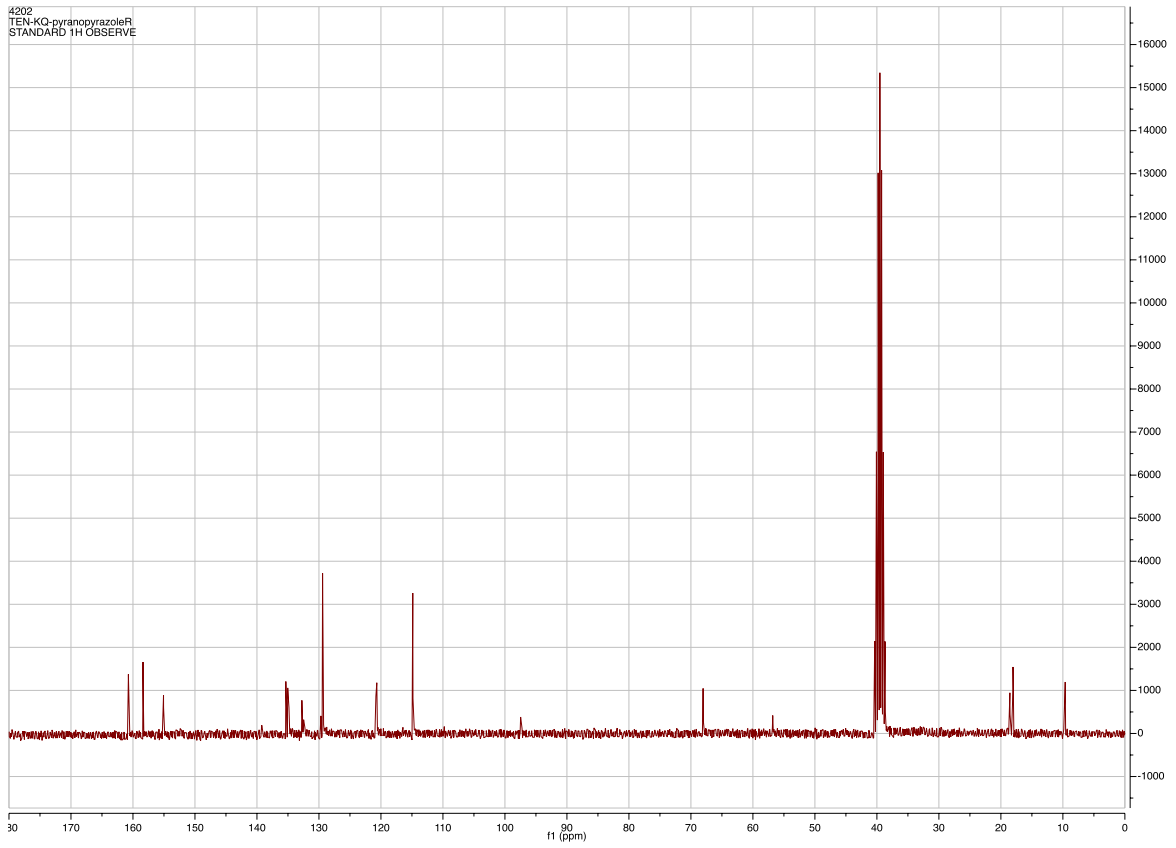

**6-amino-4-(5-(((5-chloroquinolin-8-yl)oxy)methyl)-2,4-dimethylphenyl)-3-methyl-1,4-dihydropyrano[2,3-c]pyrazole-5-carbonitrile (10s)**

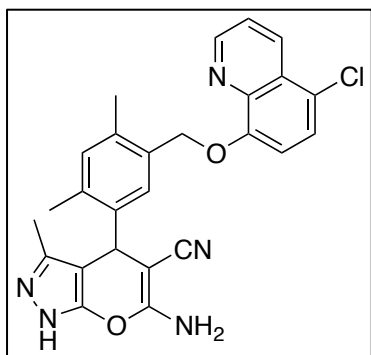

UPLC: Rt = 1.72, 1.78 (2,4-dihydro tautomer);

UPLC-MS (ESI) calculated for  $C_{26}H_{23}ClN_5O_2 [M + H]^+$ :  $m/z = 472.2$  ( $^{35}Cl$ ),  $474.2$  ( $^{37}Cl$ ), found  $m/z = 472.2$  (100 %),  $474.2$  (33 %);

$^1H$  NMR (300 MHz,  $DMSO-d_6$ ):  $\delta = 12.04$  (s, 1H, ArNH),  $9.05-8.82$  (m, 1H, ArH),  $8.57-8.38$  (m, 1H, ArH),  $7.80 - 7.53$  (m, 2H, ArH),  $7.28$  (m, 1H, ArH),  $7.14$  (s, 1H, ArH),  $7.01$  (s, 1H, ArH),  $6.83$  (s, 2H, ArNH<sub>2</sub>),  $5.19$  (s, 2H, ArCH<sub>2</sub>OAr),  $4.86$  (s, 1H, CHAr),  $2.31$  (s, 3H ArCH<sub>3</sub>),  $2.29$  (s, 3H ArCH<sub>3</sub>),  $1.70$  (s, 3H ArCH<sub>3</sub>);

$^{13}C$  NMR (75 MHz,  $DMSO-d_6$ ):  $\delta = 160.75, 155.06, 153.64, 149.86, 140.49, 135.50, 135.03, 132.50, 132.47, 132.17, 130.13, 130.07,$

$126.69, 126.16, 123.00, 120.83, 120.77, 110.34, 97.50, 69.23, 56.80, 40.08, 18.60, 18.13, 9.66.$

3: UV Detector: TIC

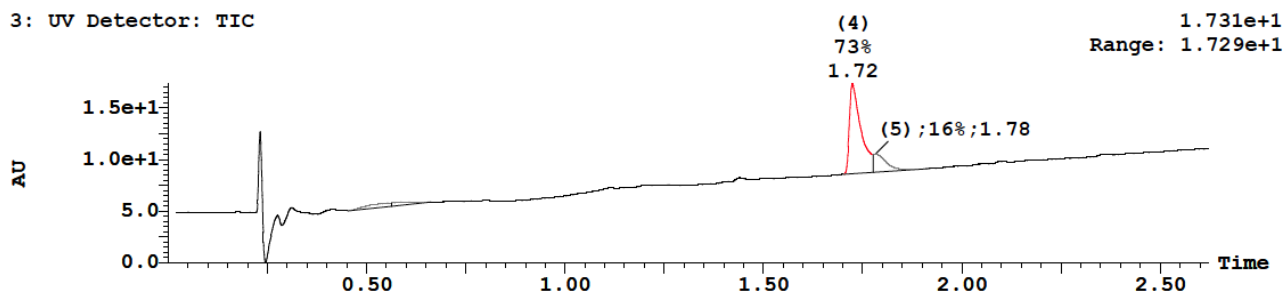

4301  
TEN-KQ-pyranopyrazoleT  
STANDARD 1H OBSERVE

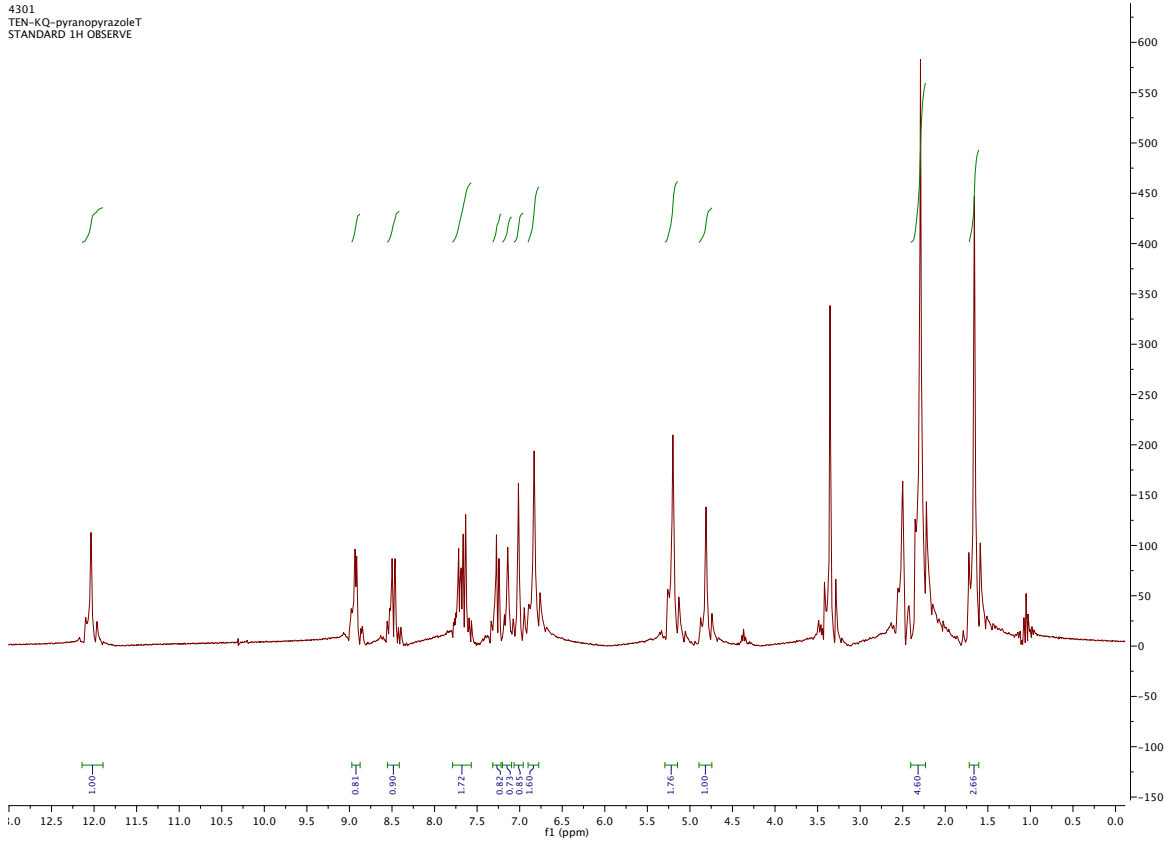

4302  
TEN-KQ-pyranopyrazoleT  
STANDARD 1H OBSERVE

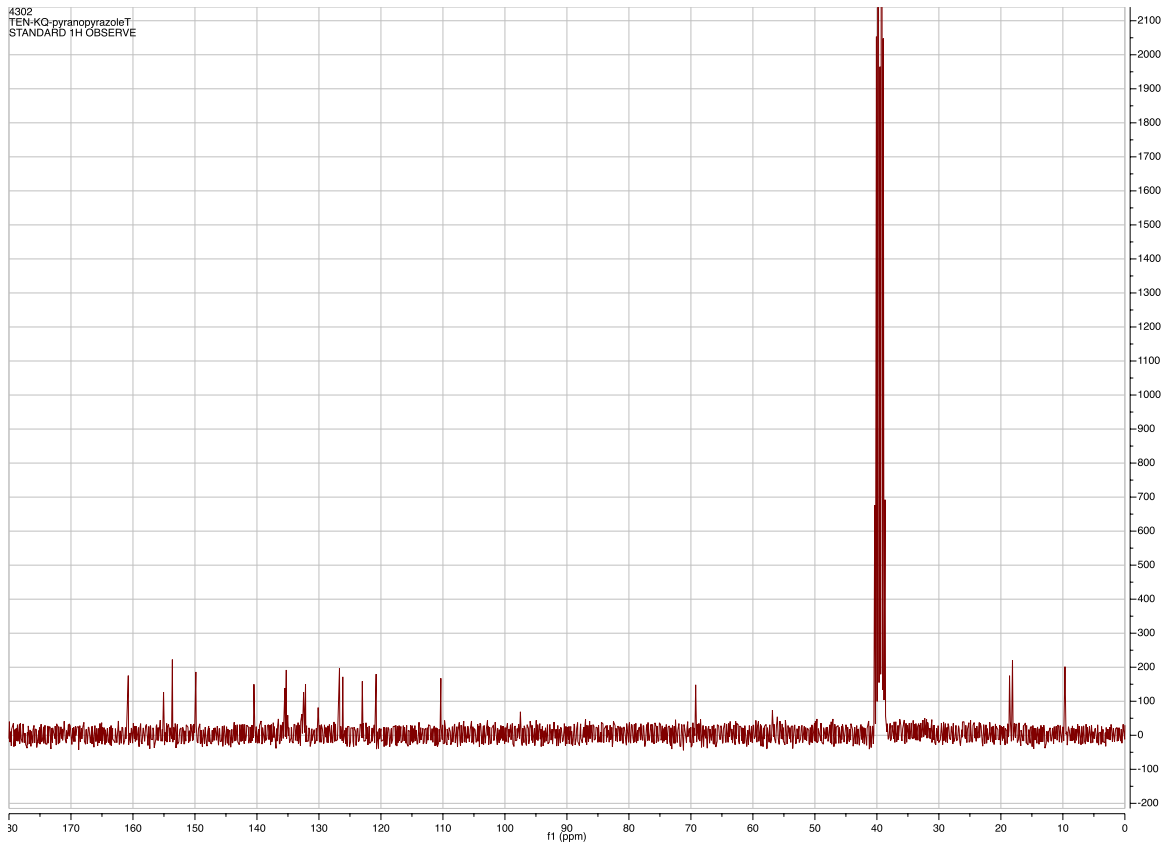

**6-amino-4-(5-(((4-chloronaphthalen-1-yl)oxy)methyl)-2,4-dimethylphenyl)-3-methyl-1,4-dihydropyranopyrazolo[2,3-c]pyrazole-5-carbonitrile (10t)**

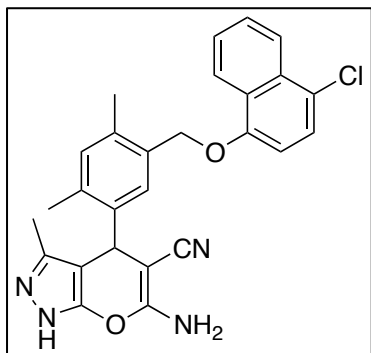

UPLC: Rt = 2.21, 2.28 (2,4-dihydro tautomer);

UPLC-MS (ESI) calculated for C<sub>27</sub>H<sub>24</sub>ClN<sub>4</sub>O<sub>2</sub> [M + H]<sup>+</sup>: m/z = 471.2 (<sup>35</sup>Cl), 473.2 (<sup>37</sup>Cl), found m/z = 471.2 (100 %), 473.2 (33 %);

<sup>1</sup>H NMR (300 MHz, DMSO-*d*<sub>6</sub>): δ = 12.10 (s, 1H, ArNH), 8.25-8.01 (m, 2H, ArH), 7.74 – 7.56 (m, 2H, ArH), 7.58 (d, *J* = 8.3 Hz, 2H, ArH), 7.25 (s, 1H, ArH), 7.07 (d, *J* = 8.4 Hz, 1H, ArH), 7.02 (s, 1H, ArH), 6.88 (s, 2H, ArNH<sub>2</sub>), 5.19 (s, 2H, ArCH<sub>2</sub>OAr), 4.86 (s, 1H, CHAr), 2.31 (s, 3H ArCH<sub>3</sub>), 2.29 (s, 3H ArCH<sub>3</sub>), 1.70 (s, 3H ArCH<sub>3</sub>);

<sup>13</sup>C NMR (75 MHz, DMSO-*d*<sub>6</sub>): δ = 160.81, 155.21, 153.04, 135.31, 134.61, 134.57, 134.38, 132.65, 132.37, 130.44, 127.98, 126.62, 126.25, 126.13, 123.67, 122.08, 121.76, 120.91, 109.35, 106.29, 97.69, 68.25, 56.97, 18.55, 18.02 (two overlapping), 9.66.

3: UV Detector: TIC

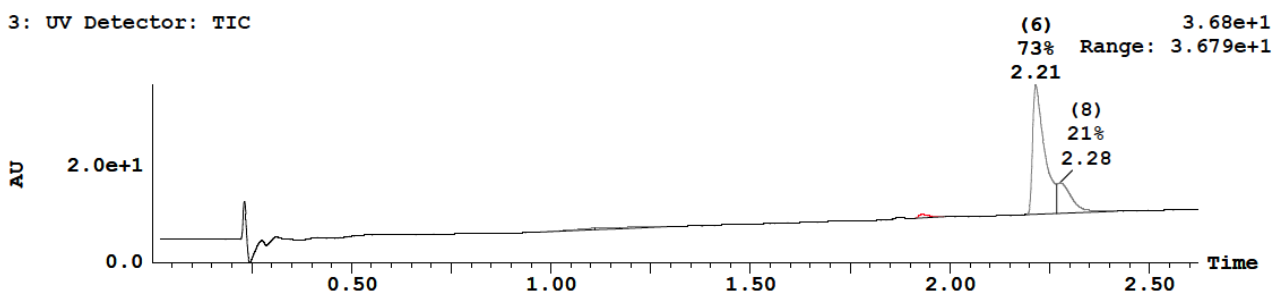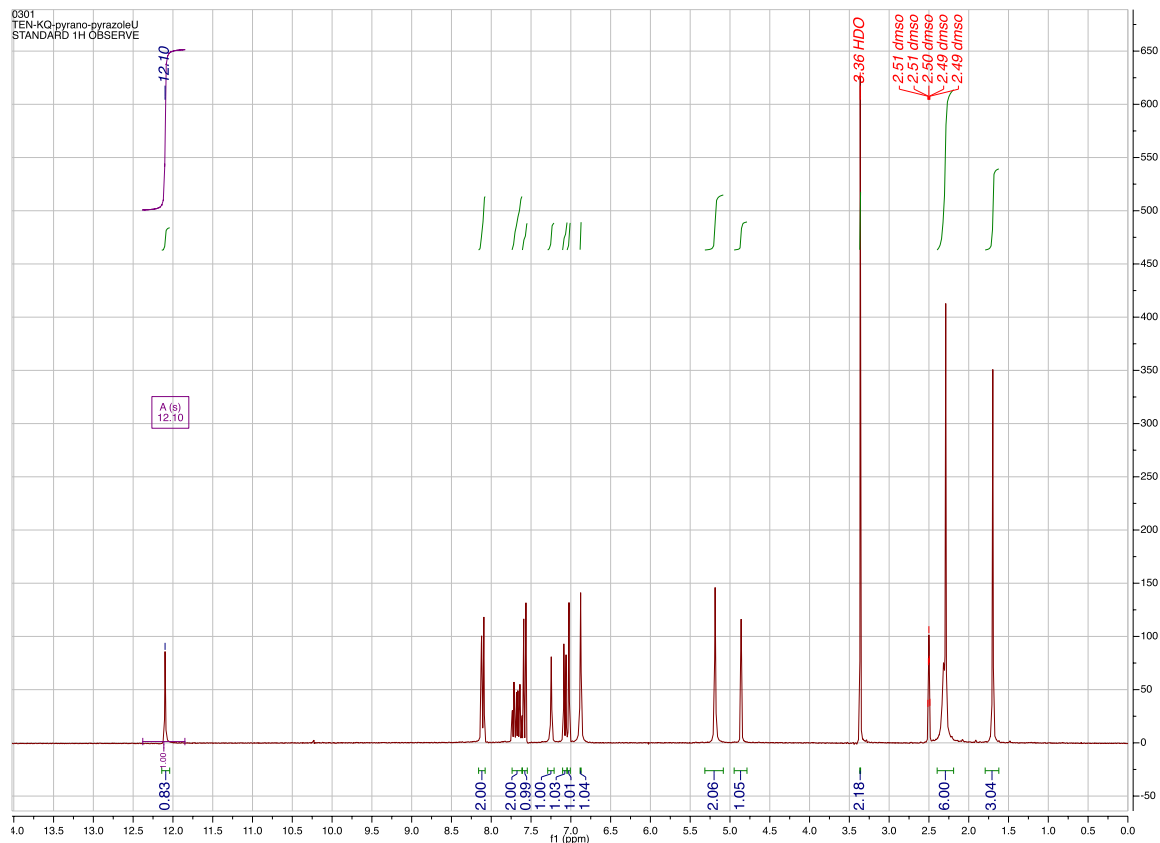



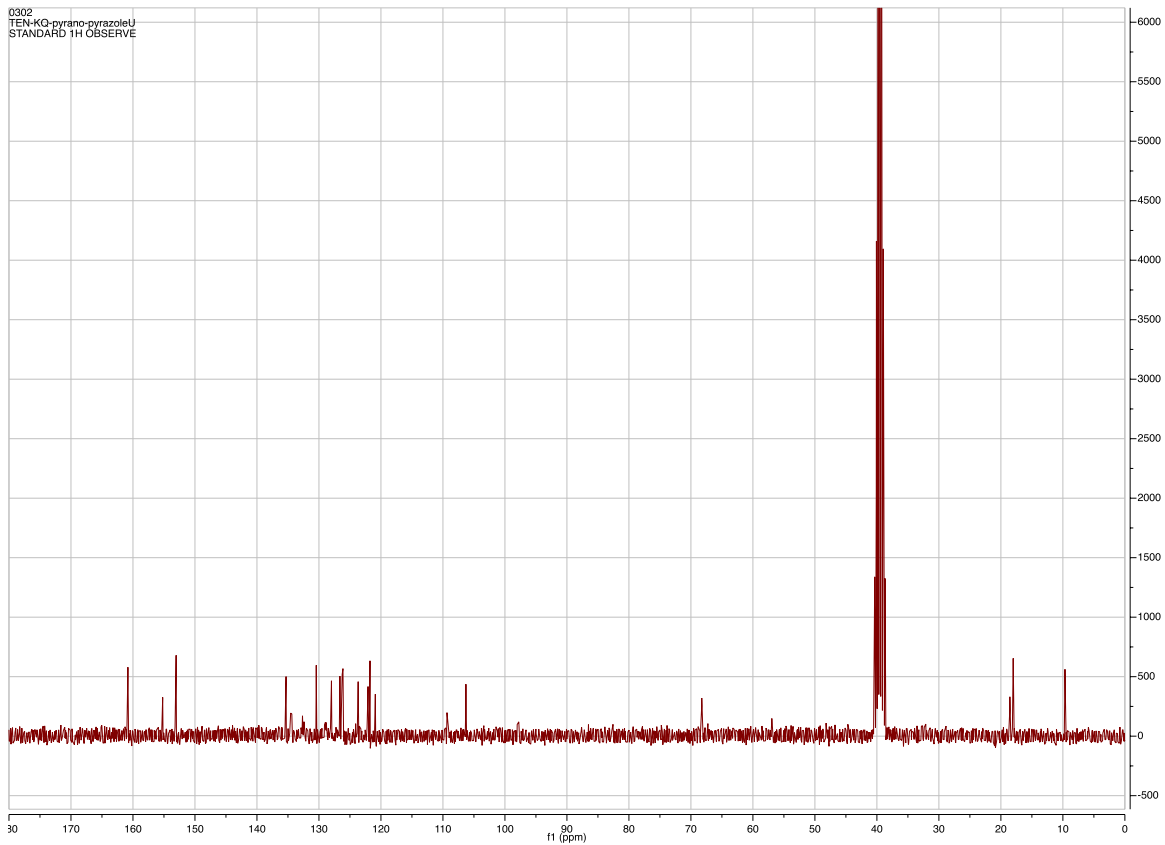

### 6-amino-4-(4-chlorophenyl)-3-methyl-1,4-dihydropyrano[2,3-c]pyrazole-5-carbonitrile (10u)

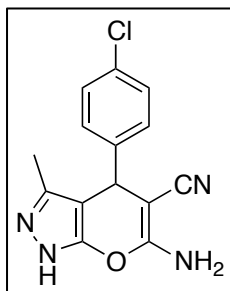

UPLC: Rt = 1.42 (2,4-dihydro tautomer seen as a shoulder);

UPLC-MS (ESI) calculated for C<sub>14</sub>H<sub>12</sub>ClN<sub>4</sub>O [M + H]<sup>+</sup>: m/z = 287.1 (<sup>35</sup>Cl), 289.1 (<sup>37</sup>Cl), found m/z = 287.1 (100 %), 289.1 (33 %);

<sup>1</sup>H NMR (400 MHz, DMSO-*d*<sub>6</sub>): δ = 12.13 (s, 1H, ArNH), 7.38 (d, *J* = 8.4 Hz, 2H, 2 × ArH), 7.19 (d, *J* = 8.5 Hz, 2H, 2 × ArH), 6.92 (s, 2H, ArNH<sub>2</sub>), 4.63 (s, 1H, CHAr), 1.79 (s, 3H, ArCH<sub>3</sub>);

<sup>13</sup>C NMR (100 MHz, DMSO-*d*<sub>6</sub>): δ = 160.90, 154.69, 143.49, 135.65, 131.21, 129.36, 128.45, 120.64, 97.19, 56.74, 35.55, 9.74.

3: UV Detector: TIC

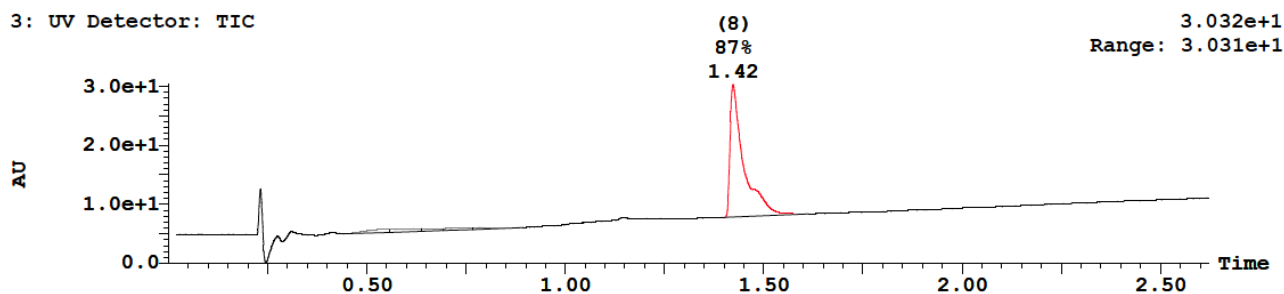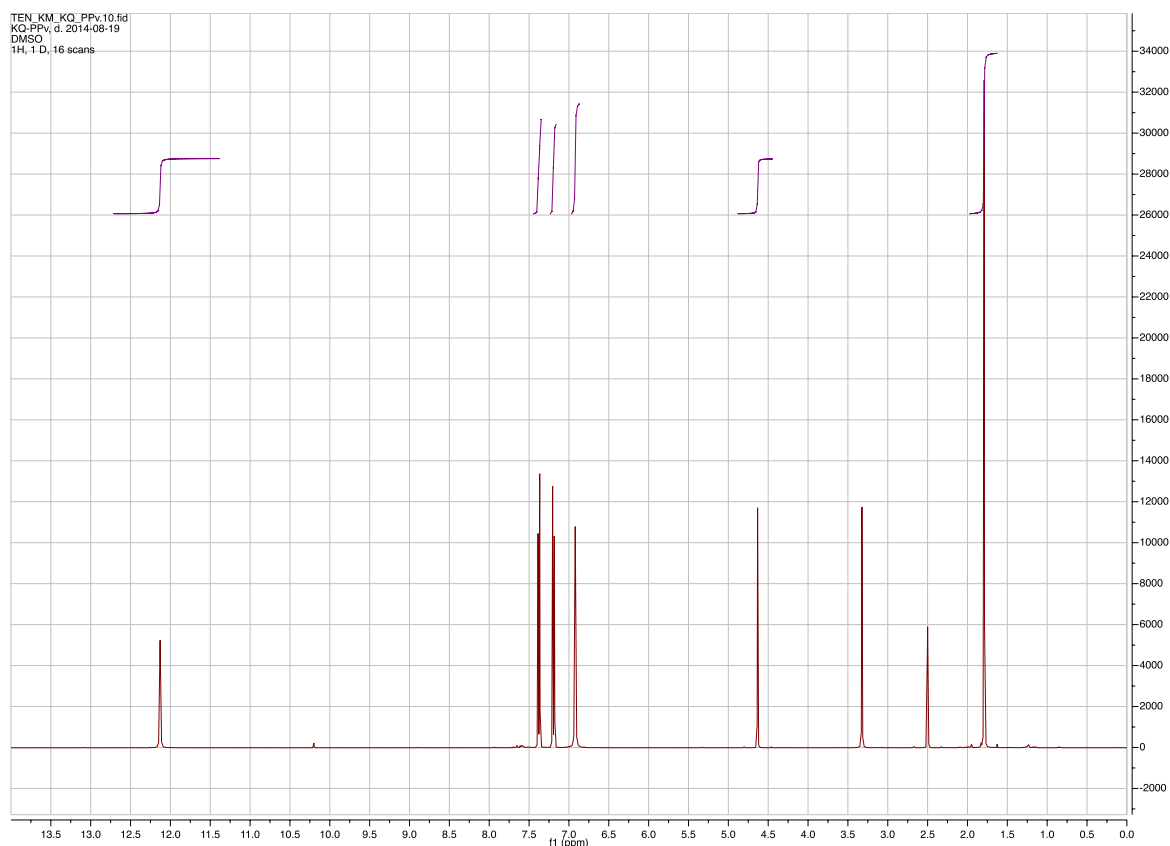

TEN\_KM\_KO\_PPv.11.lid  
KO\_PPv, d. 2014-08-19  
DMSO  
13C, 1 D, 256 scans

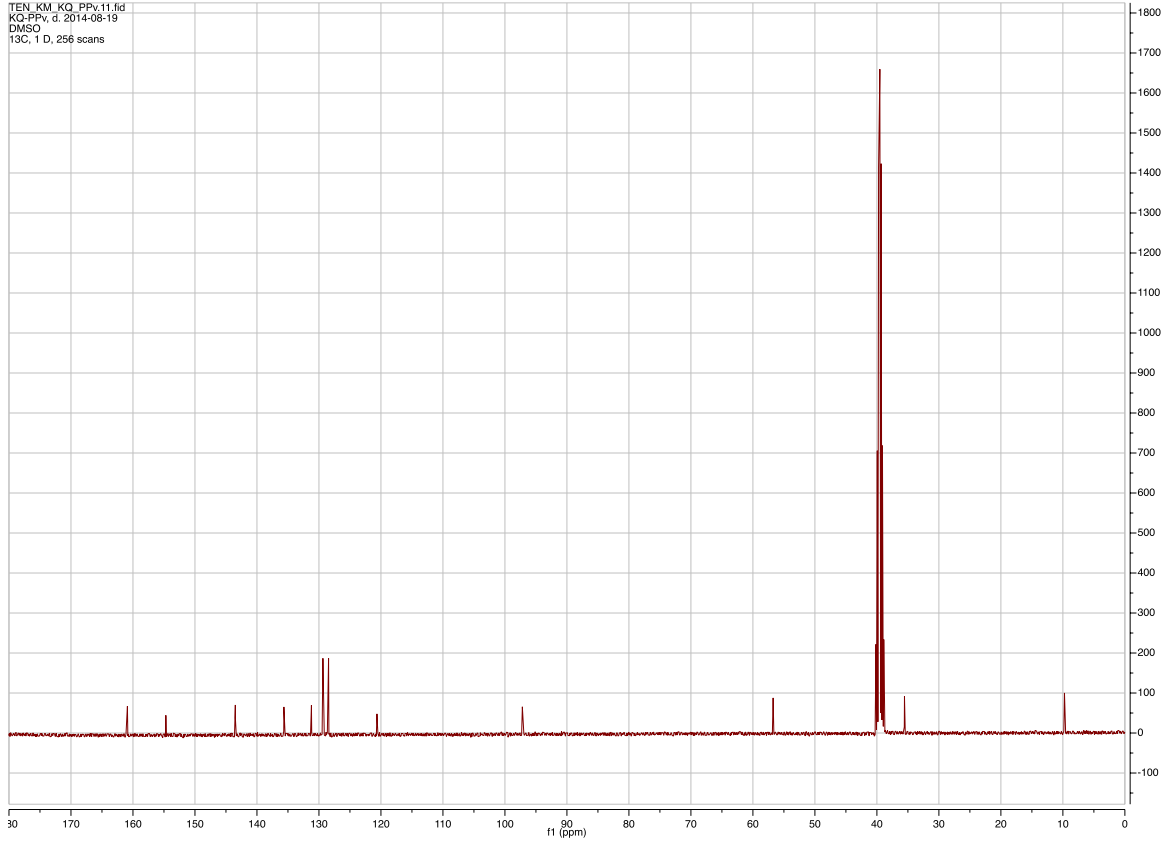

### 6-amino-3-methyl-4-(*o*-tolyl)-1,4-dihydropyrano[2,3-*c*]pyrazole-5-carbonitrile (10v)

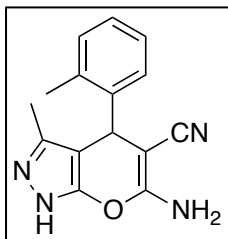

UPLC: Rt = 1.34 (2,4-dihydro tautomer seen as a shoulder);

UPLC-MS (ESI) calculated for C<sub>15</sub>H<sub>15</sub>N<sub>4</sub>O [M + H]<sup>+</sup>: *m/z* = 267.1, found *m/z* = 267.1;

<sup>1</sup>H NMR (400 MHz, DMSO-*d*<sub>6</sub>): δ = 12.07 (s, 1H, ArNH), 7.18-7.06 (m, 3H, 3 × ArH), (dd, *J* = 7.7, 2.1 Hz, 1H, ArH), 6.82 (s, 2H, ArNH<sub>2</sub>), 4.84 (s, 1H, CHAr), 2.28 (s, 3H, ArCH<sub>3</sub>), 1.68 (s, 3H, ArCH<sub>3</sub>);

<sup>13</sup>C NMR (100 MHz, DMSO-*d*<sub>6</sub>): δ = 160.74, 155.06, 141.86, 135.30, 134.95, 130.46, 128.88, 126.56, 126.30, 120.69, 97.53, 56.73, 33.07, 18.90, 9.52.

3: UV Detector: TIC

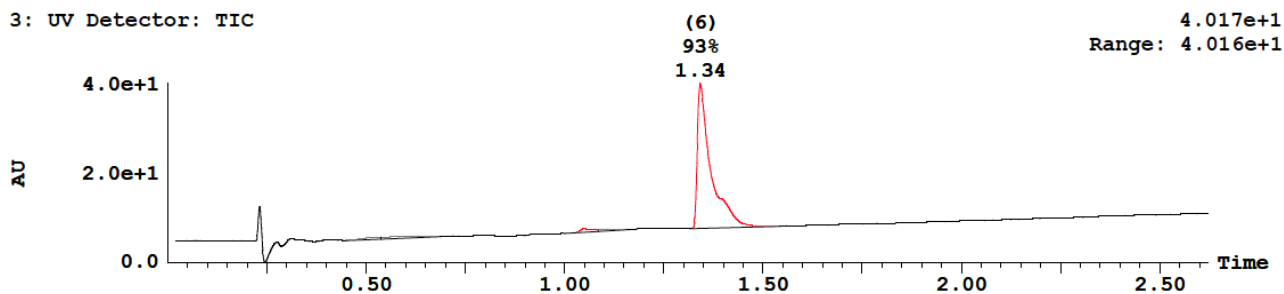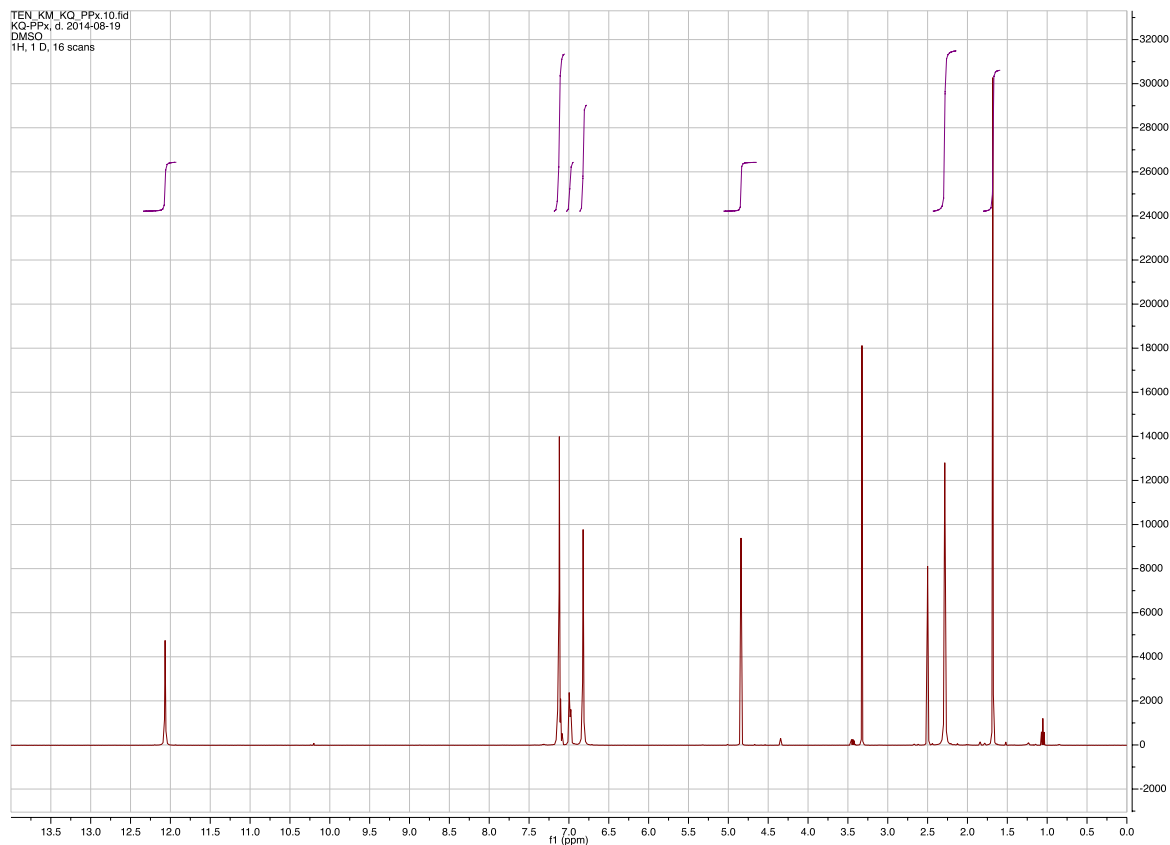

TEN\_KM\_KQ\_PPx:11.jid  
KQ-PPx, d. 2014-08-19  
DMSO  
13C, 1 D, 256 scans

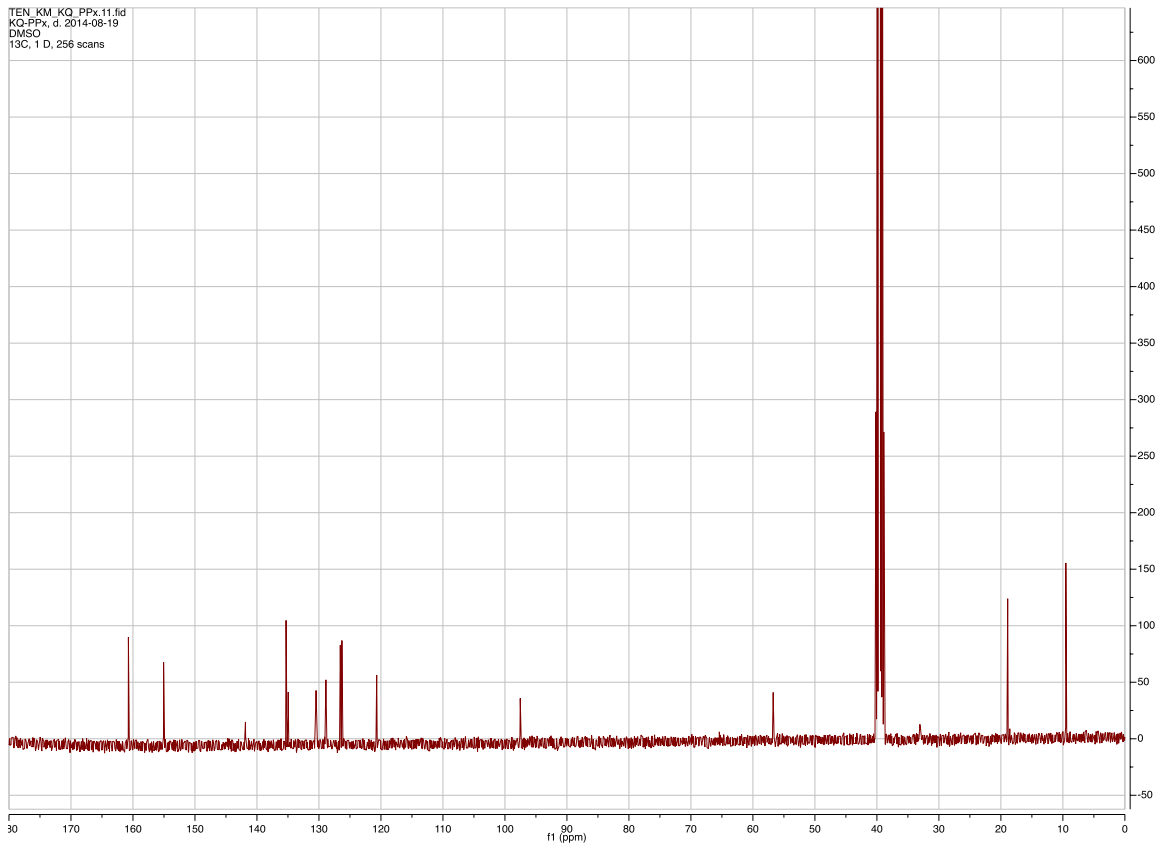

**6-amino-4-(2,4-dichlorophenyl)-3-methyl-1,4-dihydropyrano[2,3-c]pyrazole-5-carbonitrile (10x)**

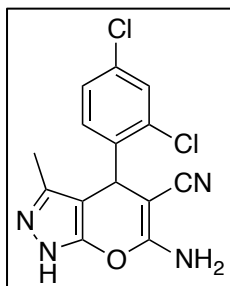

UPLC-UV: Rt = 1.54 (2,4-dihydro tautomer seen as a shoulder);

UPLC-MS (ESI) calculated for C<sub>14</sub>H<sub>11</sub>Cl<sub>2</sub>N<sub>4</sub>O<sub>2</sub> [M + H]<sup>+</sup>: m/z = 321.0 (2 x <sup>35</sup>Cl), 323.0 (1 x <sup>37</sup>Cl, 1 x <sup>35</sup>Cl), found m/z = 321.0 (100 %), 323.0 (64 %);

<sup>1</sup>H NMR (400 MHz, DMSO-*d*<sub>6</sub>): δ = 12.17 (s, 1H, ArNH), 7.58 (s, 1H, ArH), 7.42 (d, *J* = 7.6 Hz, 1H, ArH), 7.42 (d, *J* = 7.7 Hz, 1H, ArH), 7.02 (s, 2H, ArNH<sub>2</sub>), 5.06 (s, 1H, CHAr), 1.78 (s, 3H, ArCH<sub>3</sub>);

<sup>13</sup>C NMR (100 MHz, DMSO-*d*<sub>6</sub>): δ = 161.36, 154.93, 140.13, 135.49, 132.87, 132.16 (two overlapping), 128.88, 128.08, 120.33, 96.38, 55.24, 33.11, 9.60;

IR (neat): 1410, 1585, 2183, 3101, 3246.

3: UV Detector: TIC

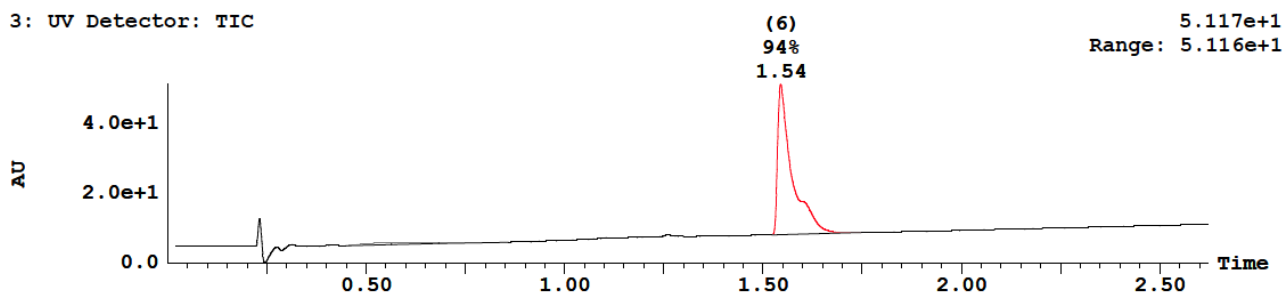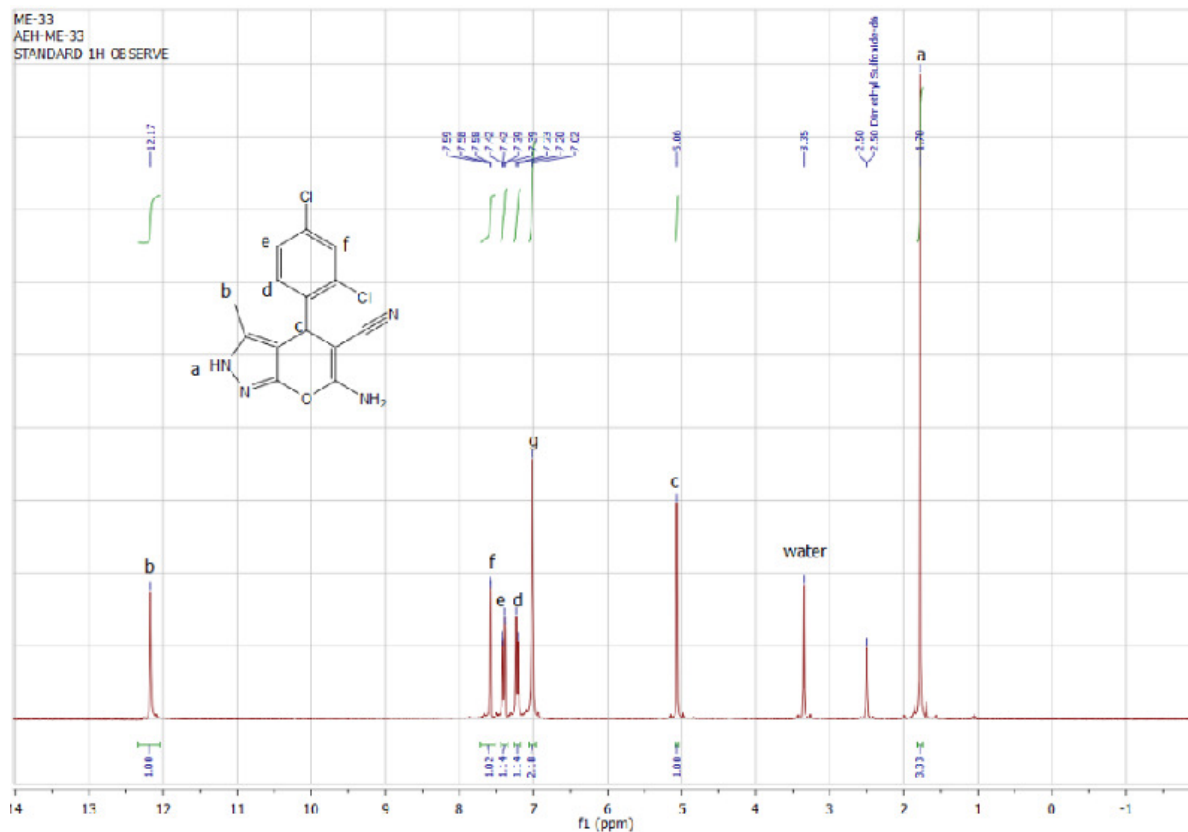

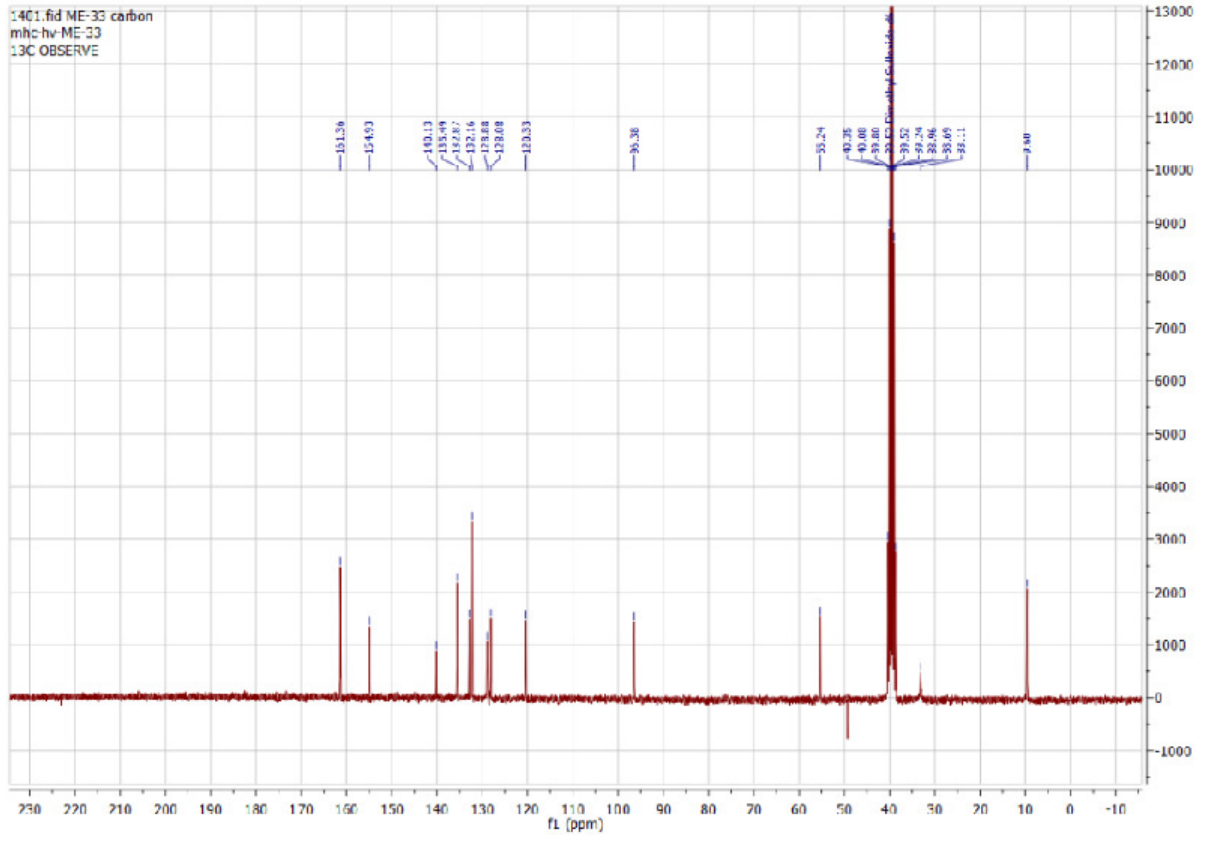

**6-amino-4-(4-methoxy-2,3-dimethylphenyl)-3-methyl-1,4-dihydropyranopyrazole-5-carbonitrile (10y)**

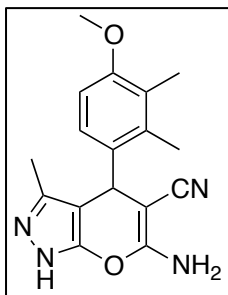

UPLC: Rt = 1.47 (2,4-dihydro tautomer seen as a shoulder).

UPLC-MS (ESI) calculated for C<sub>17</sub>H<sub>19</sub>N<sub>4</sub>O<sub>2</sub> [M + H]<sup>+</sup>: m/z = 311.2, found m/z = 311.1

<sup>1</sup>H NMR (300 MHz, DMSO-*d*<sub>6</sub>): δ = 12.04 (s, 1H, ArNH), 6.80-6.75 (m, 4H, 2 × ArH + 2 × ArNH<sub>2</sub>), 4.85 (s, 1H, CHAr), 3.22 (s, 3H, ArOCH<sub>3</sub>), 2.10 (s, 3H, ArCH<sub>3</sub>), 2.09 (s, 3H, ArCH<sub>3</sub>), 1.69 (s, 3H, ArCH<sub>3</sub>);

3: UV Detector: TIC

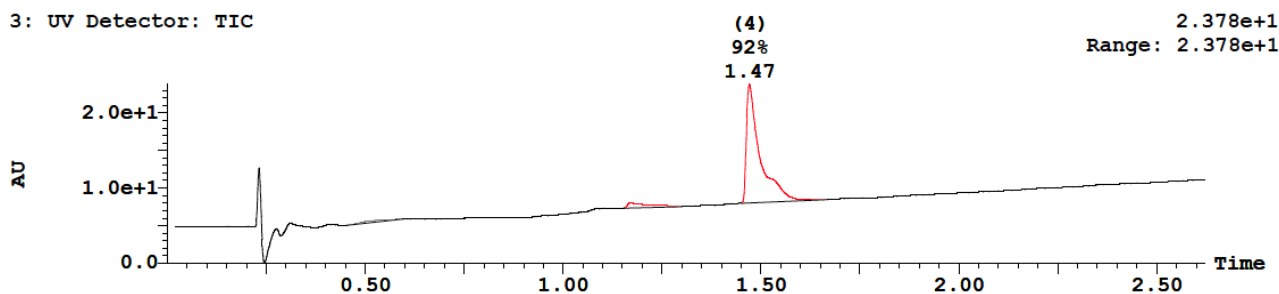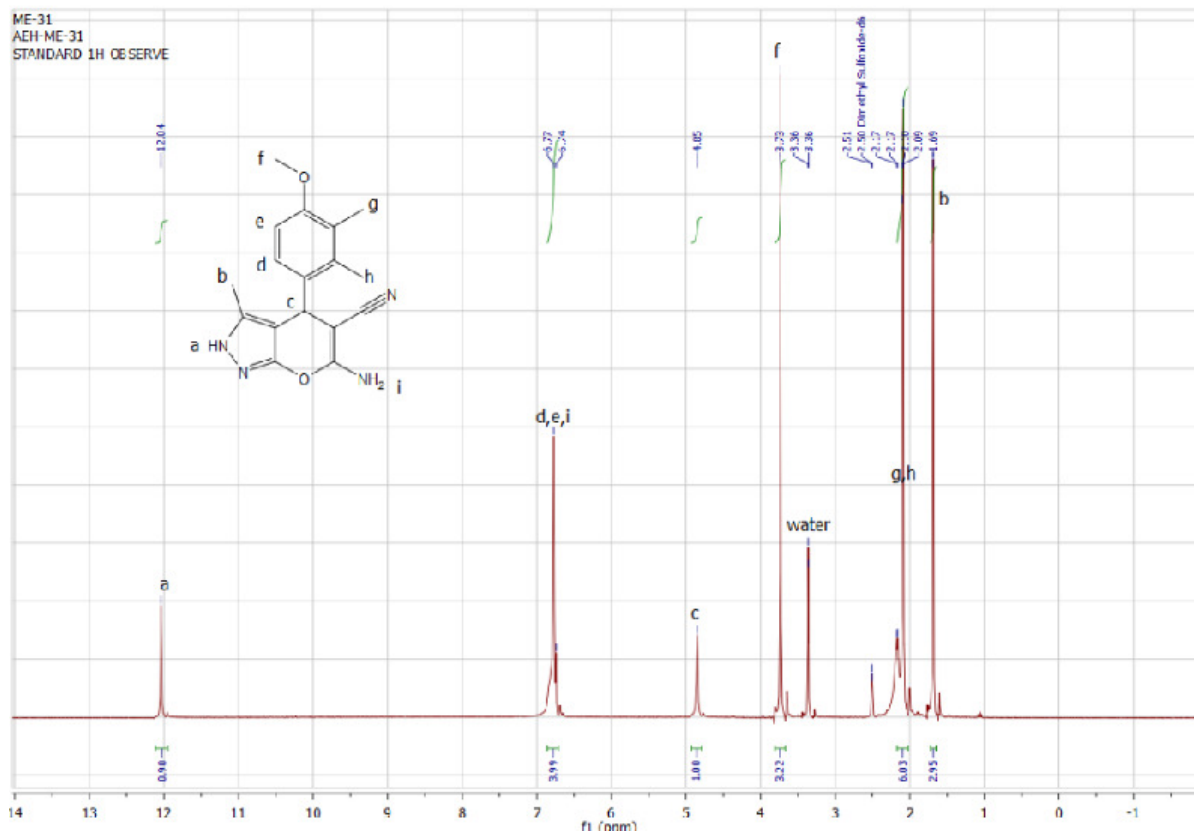



## 6-amino-3-methyl-4-phenyl-1,4-dihydropyranopyrazole-5-carbonitrile (10z)

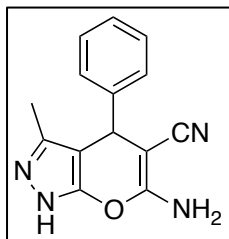

UPLC-UV: Rt = 1.25 (2,4-dihydro tautomer seen as a shoulder).

UPLC-MS (ESI) calculated for C<sub>14</sub>H<sub>13</sub>N<sub>4</sub>O [M + H]<sup>+</sup>: *m/z* = 253.1, found *m/z* = 253.1;

<sup>1</sup>H-NMR (400 MHz, DMSO-*d*<sub>6</sub>): δ = 12.09 (s, 1H, ArNH), 7.31 (dd, *J* = 8.0, 6.8 Hz, 2H, ArH), 7.23 (d, *J* = 7.4 Hz, 1H, ArH), 7.20 – 7.13 (m, 2H, ArH), 6.86 (s, 2H, ArNH<sub>2</sub>), 4.59 (s, 1H, CHAr), 1.78 (s, 3H ArCH<sub>3</sub>);

<sup>13</sup>C-NMR (100 MHz, DMSO-*d*<sub>6</sub>): δ = 160.86, 154.76, 144.45, 135.55, 128.43, 127.46, 126.72, 120.79, 97.64, 57.17, 36.23, 9.74.

3: UV Detector: TIC

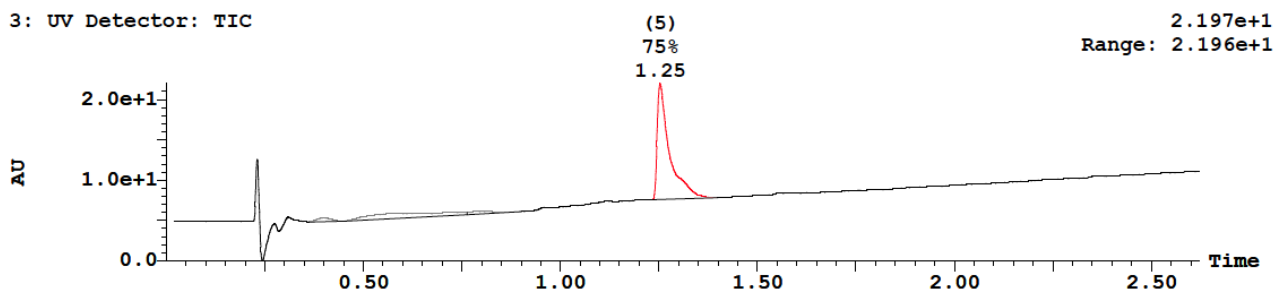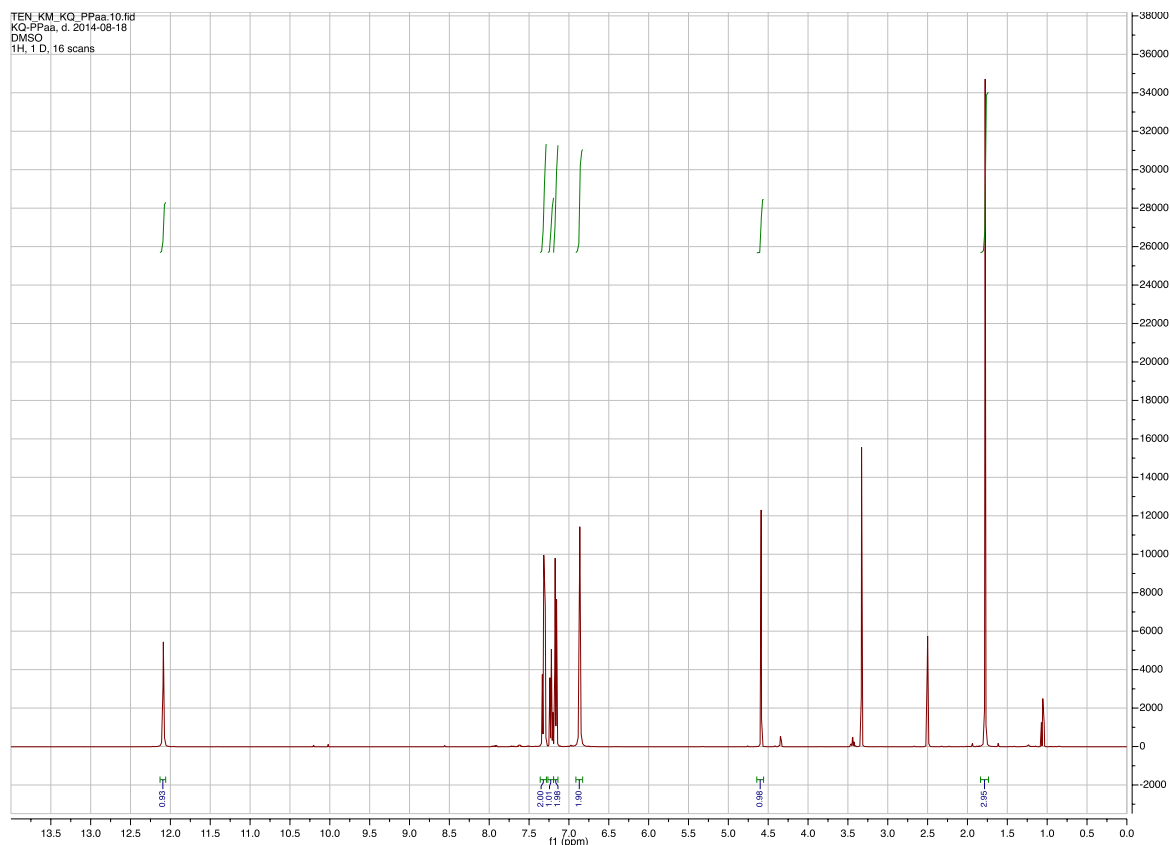

TEN\_KM\_KQ\_PPaa.11.fid  
KQ\_PPaa.d. 2014-08-18  
DMSO  
13C, 1 D, 256 scans

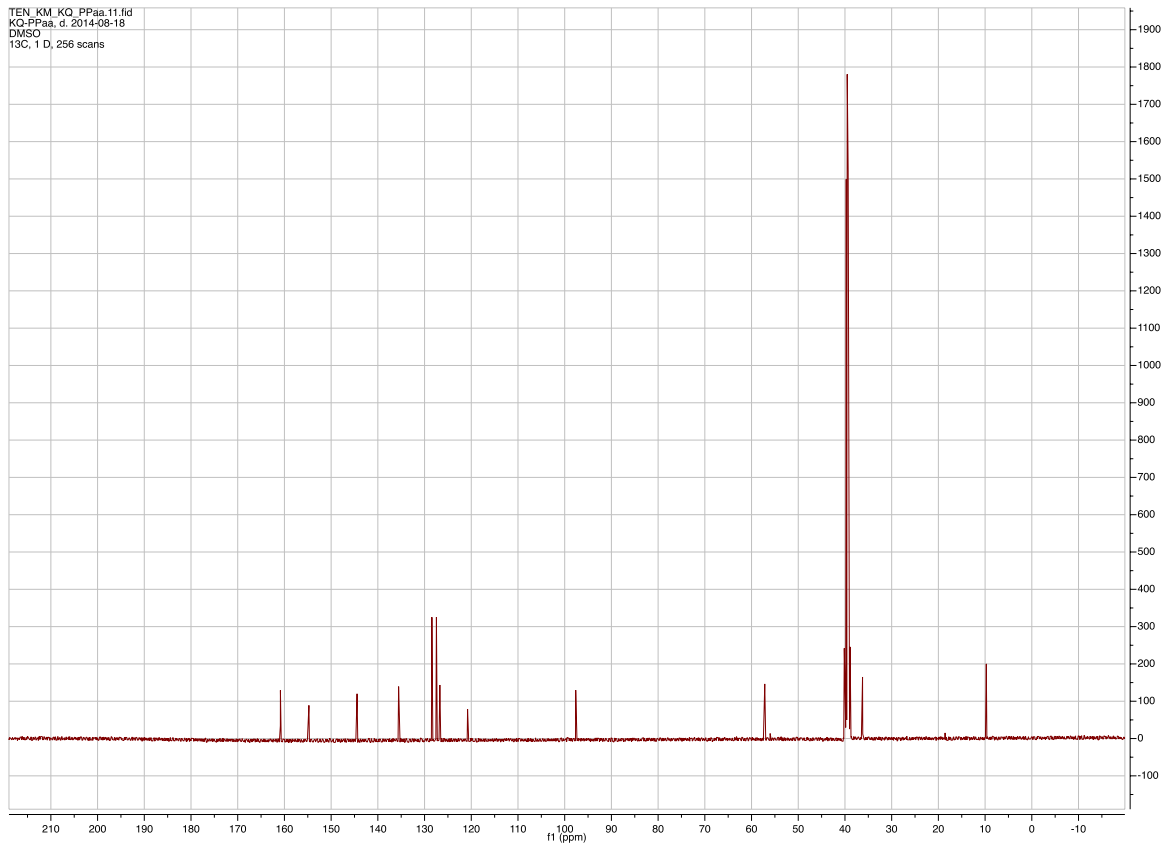

**6-amino-4-(2,4-dimethylphenyl)-3-methyl-1,4-dihydropyranopyrazole-5-carbonitrile (10aa)**

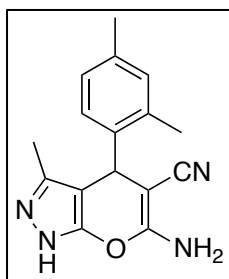

UPLC-UV:  $R_t = 1.48$  (2,4-dihydro tautomer seen as a shoulder);

UPLC-MS (ESI) calculated for  $C_{16}H_{17}N_4O$   $[M + H]^+$ :  $m/z = 281.1$ , found  $m/z = 281.1$ ;

$^1H$ -NMR (400 MHz,  $DMSO-d_6$ ):  $\delta = 12.05$  (s, 1H, ArNH), 6.93 (d,  $J = 2.3$  Hz, 2H, ArH), 6.86 (d,  $J = 8.3$  Hz, 1H, ArH), 6.79 (s, 2H, ArNH<sub>2</sub>), 4.79 (s, 1H, CHAr), 2.24 (s, 3H ArCH<sub>3</sub>), 2.23 (s, 3H ArCH<sub>3</sub>), 1.69 (s, 3H ArCH<sub>3</sub>);

$^{13}C$  NMR (100 MHz,  $DMSO-d_6$ ):  $\delta = 160.65, 155.05, 135.40, 135.27$  (two overlapping signals), 134.72, 131.11, 128.85, 126.93 (two overlapping signals), 120.71, 97.62, 56.94, 20.53 (two overlapping signals), 18.83, 9.56.

3: UV Detector: TIC

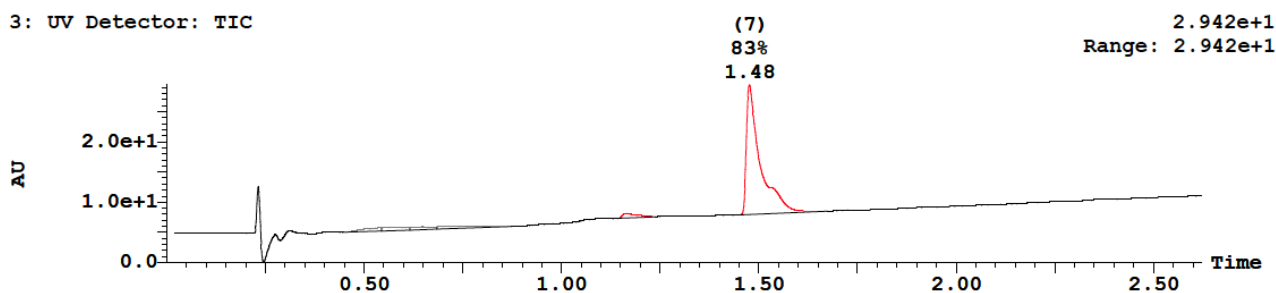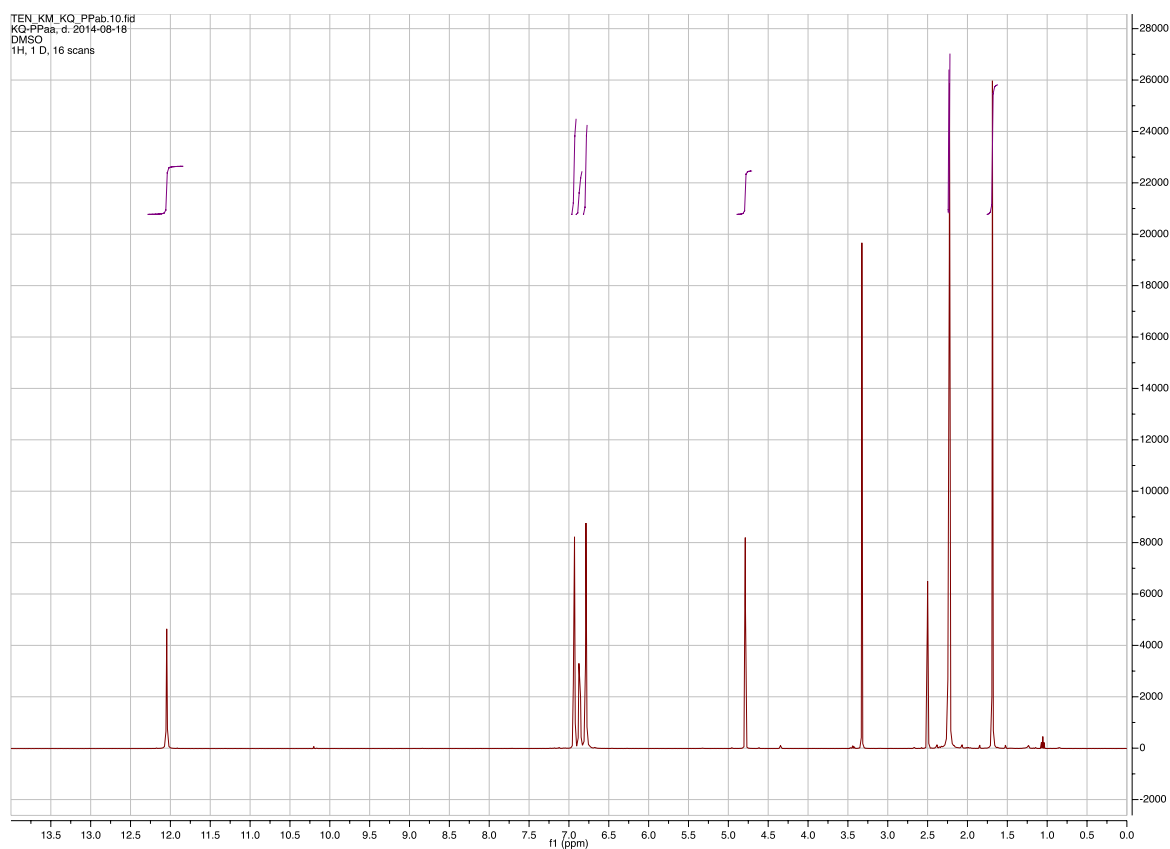

TEN\_KM\_KO\_PPab.11.fid  
KO-PPab, d. 2014-08-18  
DMSO  
13C, 1 D, 256 scans

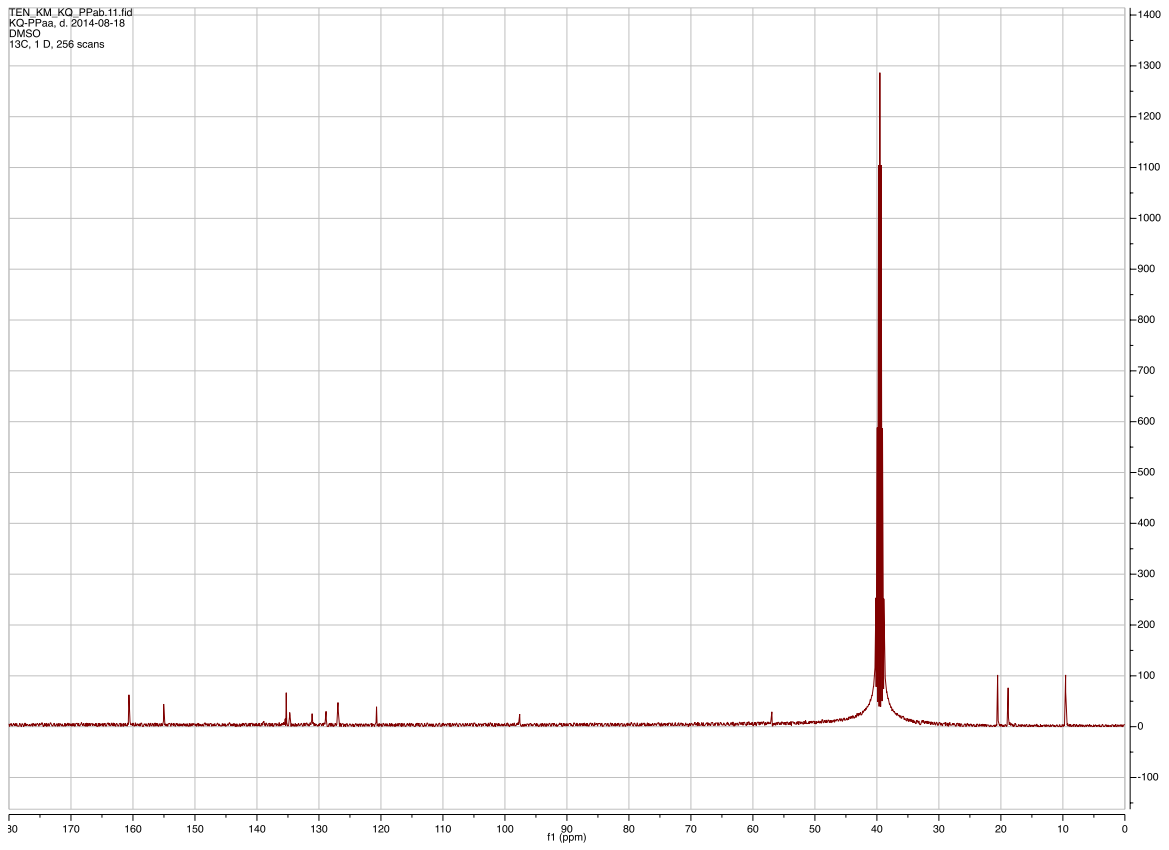

**6-amino-4-(2,5-dimethylphenyl)-3-methyl-1,4-dihydropyranopyrazole-5-carbonitrile (10ab)**

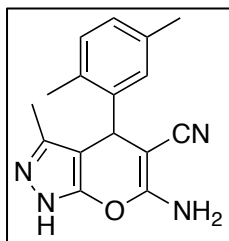

UPLC-UV:  $R_t = 1.46$ ;

UPLC-MS (ESI) calculated for  $C_{16}H_{17}N_4O$   $[M + H]^+$ :  $m/z = 281$ , found  $m/z = 281.1$ ;

$^1H$  NMR (400 MHz,  $DMSO-d_6$ ):  $\delta = 12.05$  (s, 1H, ArNH), 7.01 (d,  $J = 7.7$  Hz, 1H, ArH), 6.92 (dd,  $J = 7.8, 1.8$  Hz, 1H, ArH), 6.81 (s, 2H, ArNH<sub>2</sub>), 6.78 (s, 1H, ArH), 4.79 (s, 1H, CHAr), 2.24 (s, 3H ArCH<sub>3</sub>), 2.19 (s, 3H ArCH<sub>3</sub>), 1.69 (s, 3H ArCH<sub>3</sub>);

$^{13}C$  NMR (100 MHz,  $DMSO-d_6$ ):  $\delta = 160.71, 155.05, 135.30, 135.01, 131.86, 130.40, 129.19, 127.31$  (two overlapping signals), 120.72, 97.59, 56.87, 20.67 (two overlapping signals), 18.52, 9.56.

3: UV Detector: TIC

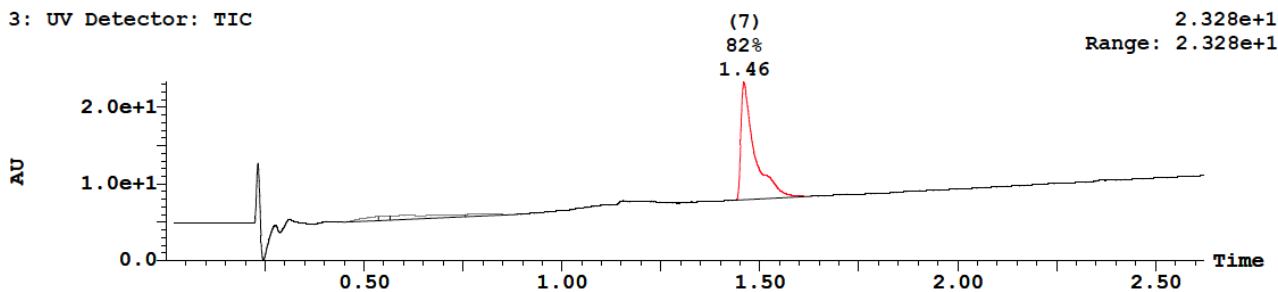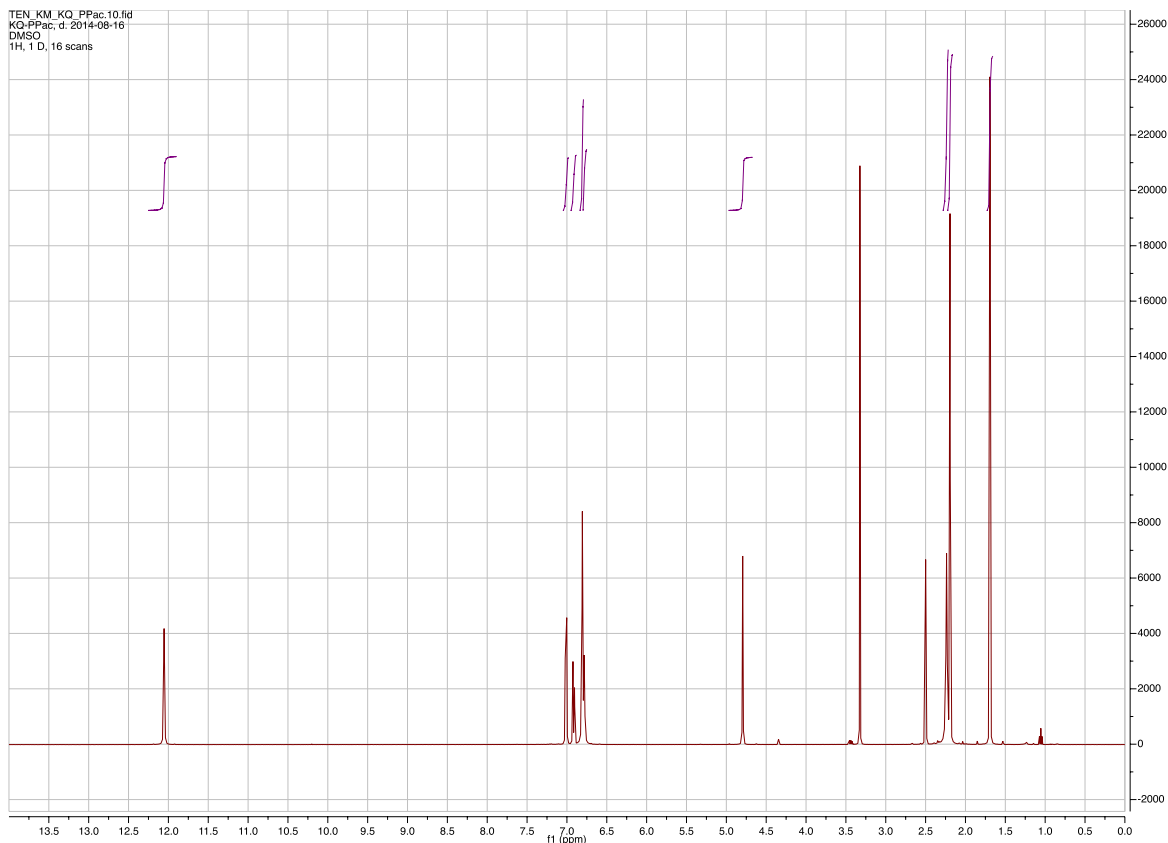

TEN\_KM\_KQ\_PPac.11.fid  
KQ\_PPac, d. 2014-08-16  
DMSO  
13C, 1 D, 256 scans

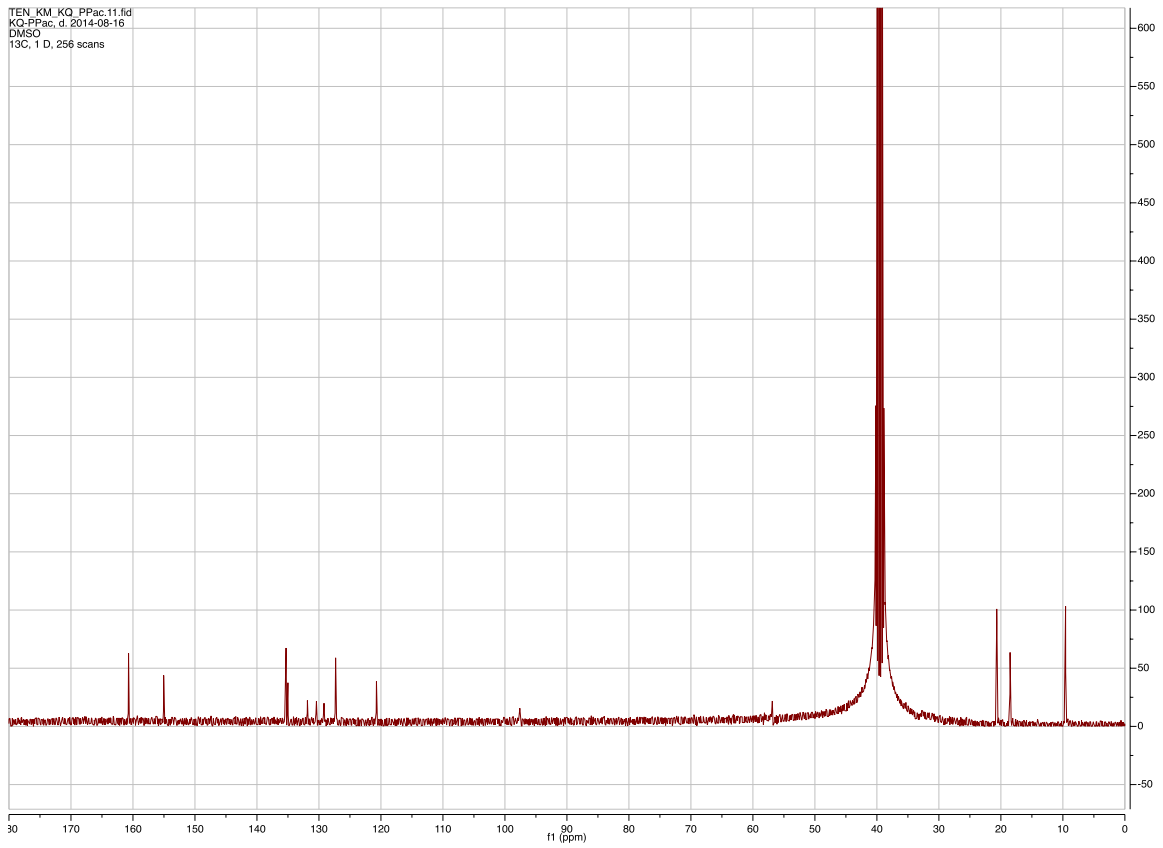

### 6-amino-4-(4-fluorophenyl)-3-methyl-1,4-dihydropyrano[2,3-c]pyrazole-5-carbonitrile (10ac)

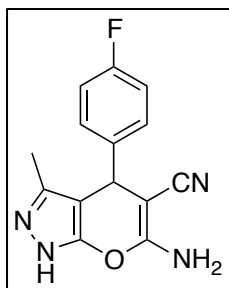

UPLC-UV:  $R_t = 1.25$ ;

UPLC-MS (ESI) calculated for  $C_{14}H_{12}FN_4O$   $[M + H]^+$ :  $m/z = 271.1$ , found  $m/z = 271.1$

$^1H$ -NMR (400 MHz,  $DMSO-d_6$ ):  $\delta = 12.11$  (s, 1H, ArNH), 7.29 – 7.03 (m, 4H, 4 × ArH), 6.89 (s, 2H, ArNH<sub>2</sub>), 4.63 (s, 1H, CHAr), 1.78 (s, 3H ArCH<sub>3</sub>);

$^{13}C$  NMR (100 MHz,  $DMSO-d_6$ ):  $\delta = 160.94$  (d,  $J = 241$  Hz), 160.81, 154.69, 140.66 (d,  $J = 2.9$  Hz), 135.61, 129.33 (d,  $J = 8.2$  Hz), 120.70, 115.16 (d,  $J = 21.4$  Hz), 97.49, 57.07, 35.43, 9.73; IR (neat): 1395, 1491, 1591, 2198, 3090,

3226.

3: UV Detector: TIC

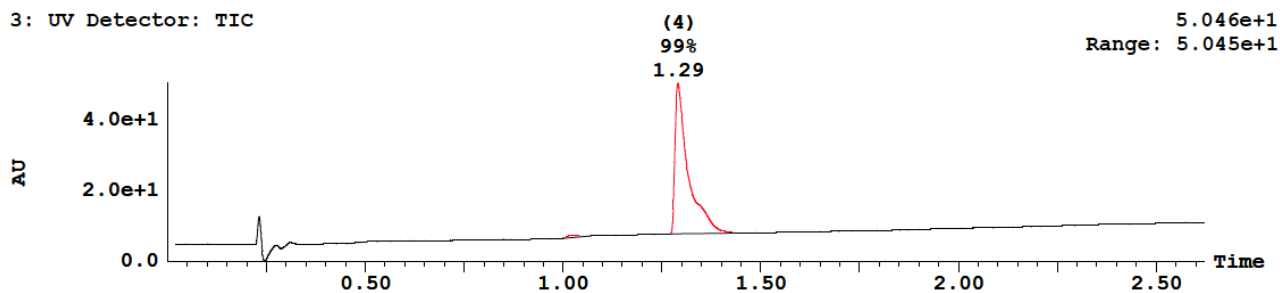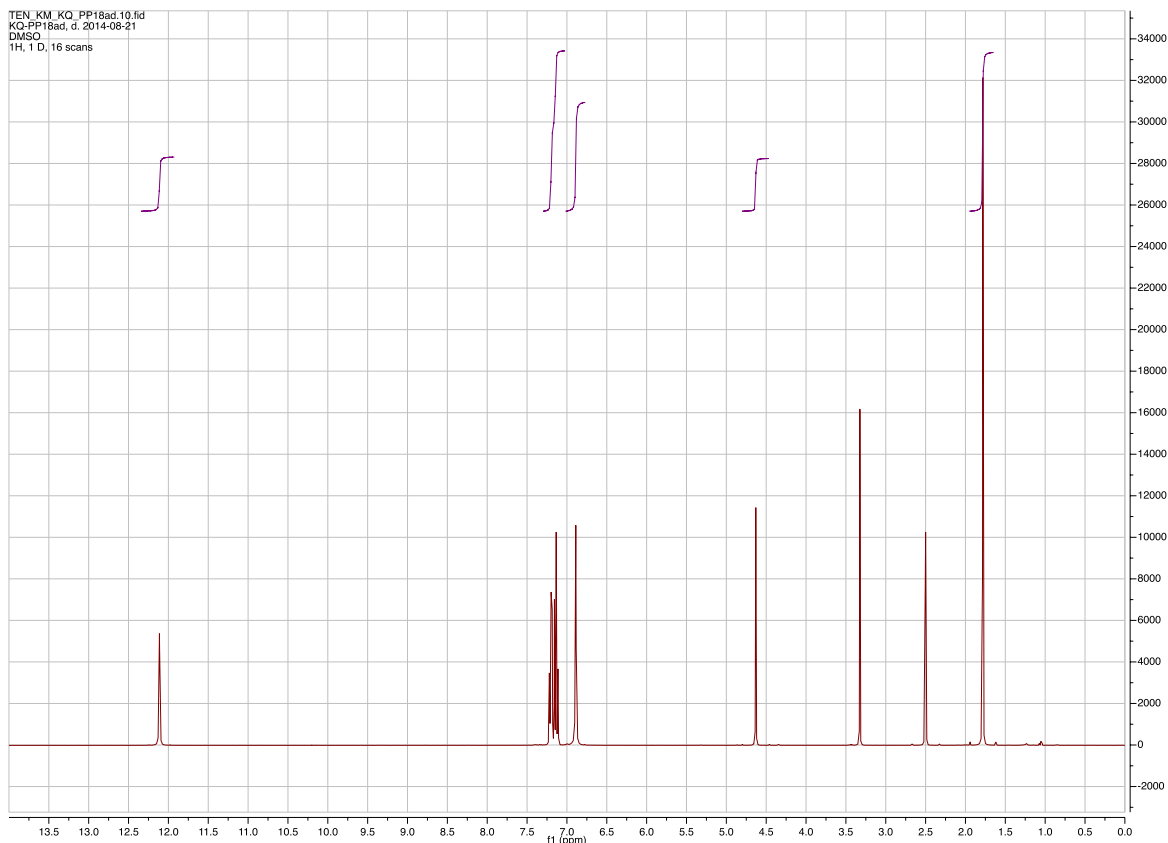

TEN\_KM\_KQ\_PP18ad.11.fid  
KQ\_PP18ad, d. 2014-08-21  
DMSO  
13C, 1 D, 256 scans

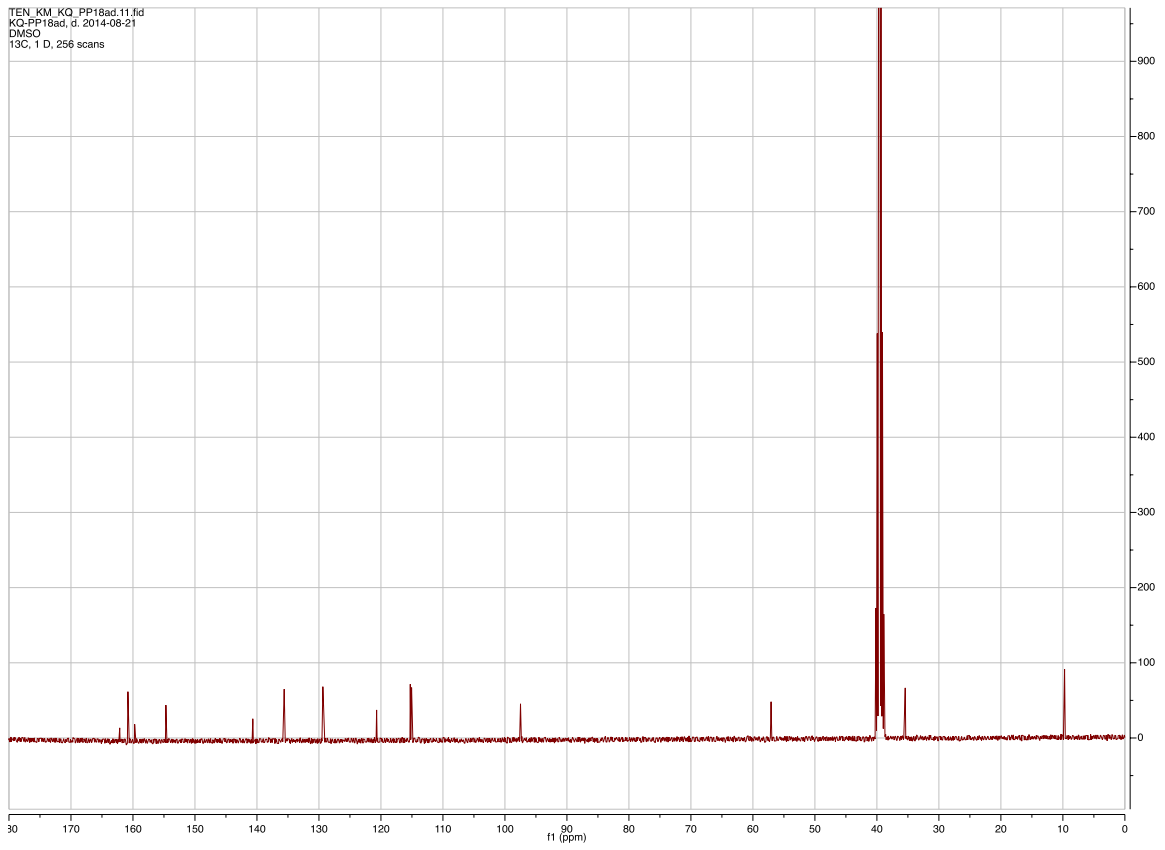



### 6-amino-3-methyl-1,4-diphenyl-1,4-dihydropyrano[2,3-c]pyrazole-5-carbonitrile (10ad)

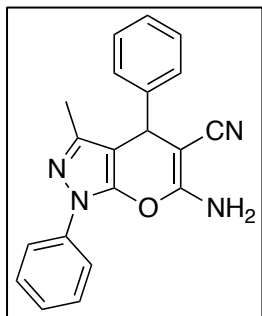

UPLC-UV:  $R_t = 1.91$ ;

UPLC-MS (ESI) calculated for  $C_{20}H_{17}N_4O [M + H]^+$ :  $m/z = 329.1$ , found  $m/z = 329.1$ ;

$^1H$  NMR (400 MHz,  $DMSO-d_6$ ):  $\delta = 7.82-7.75$  (m, 2H, ArNH), 7.49 (dd,  $J = 8.5, 7.4$  Hz, 2H, ArH), 7.39-7.29 (m, 4H, ArH), 7.29-7.23 (m, 4H, ArH), 7.20 (s, 2H, ArNH<sub>2</sub>), 4.68 (s, 1H, CHAr), 1.78 (s, 3H, ArCH<sub>3</sub>);

$^{13}C$  NMR (100 MHz,  $DMSO-d_6$ ):  $\delta = 159.41, 145.25, 143.87, 143.60, 137.52, 129.33, 128.52, 127.77, 127.04, 126.16, 120.00, 119.96, 98.63, 58.16, 36.73, 12.57$ .

3: UV Detector: TIC

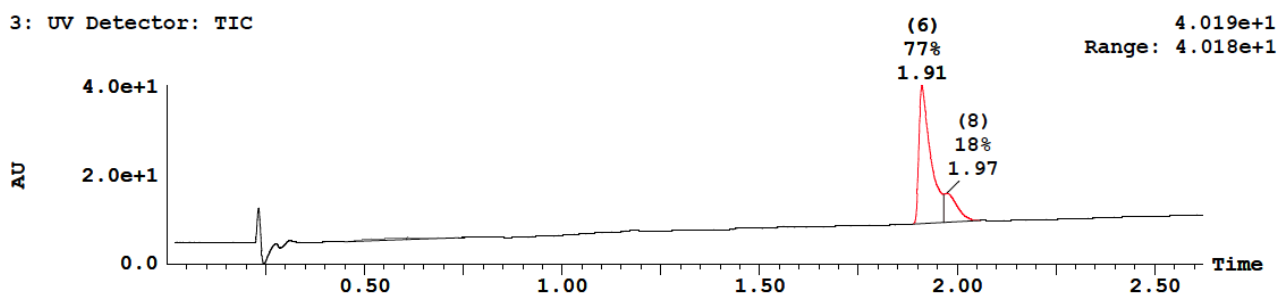

TEN\_KM\_KQ-PPae.10.fid  
KQ-PPae.d. 2014-08-18  
DMSO

$^1H$ , 1 D, 16 scans

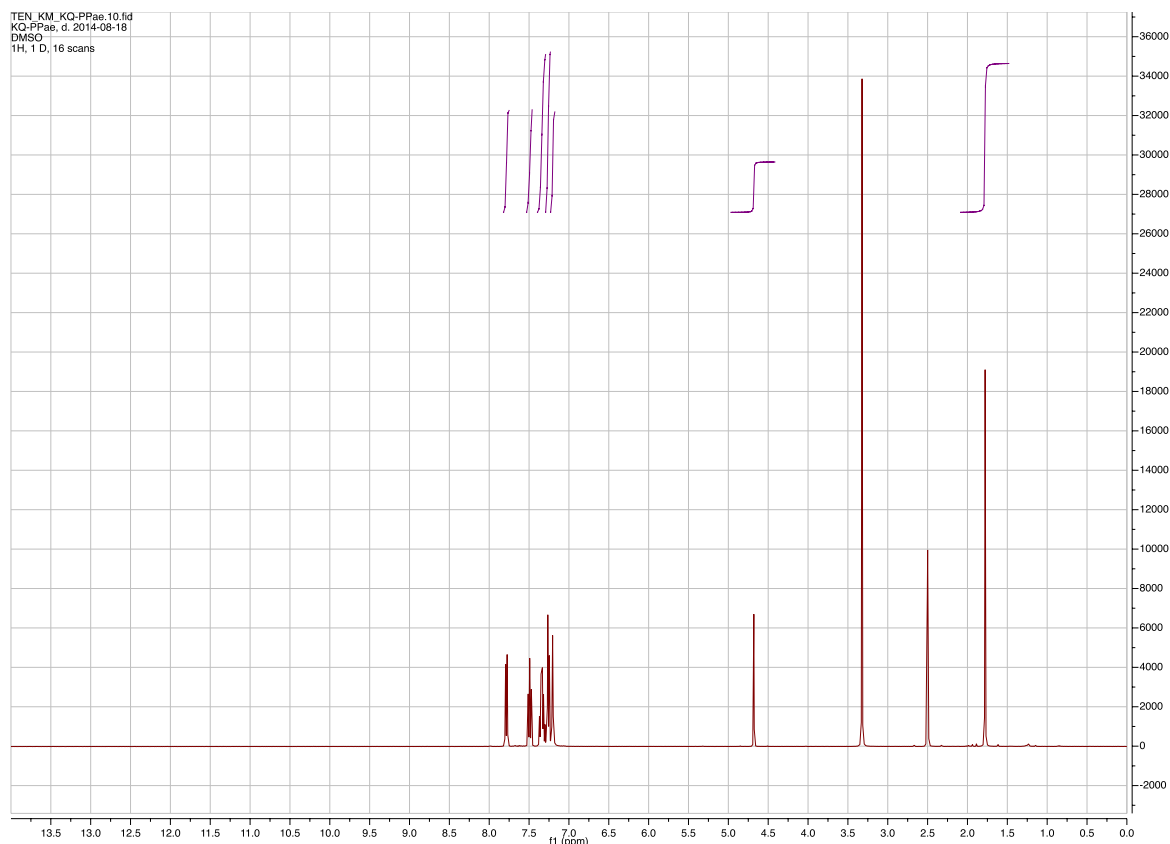

TEN\_KM\_KQ-PPae.11.fid  
KQ-PPae, d. 2014-08-18  
DMSO  
13C, 1 D, 256 scans

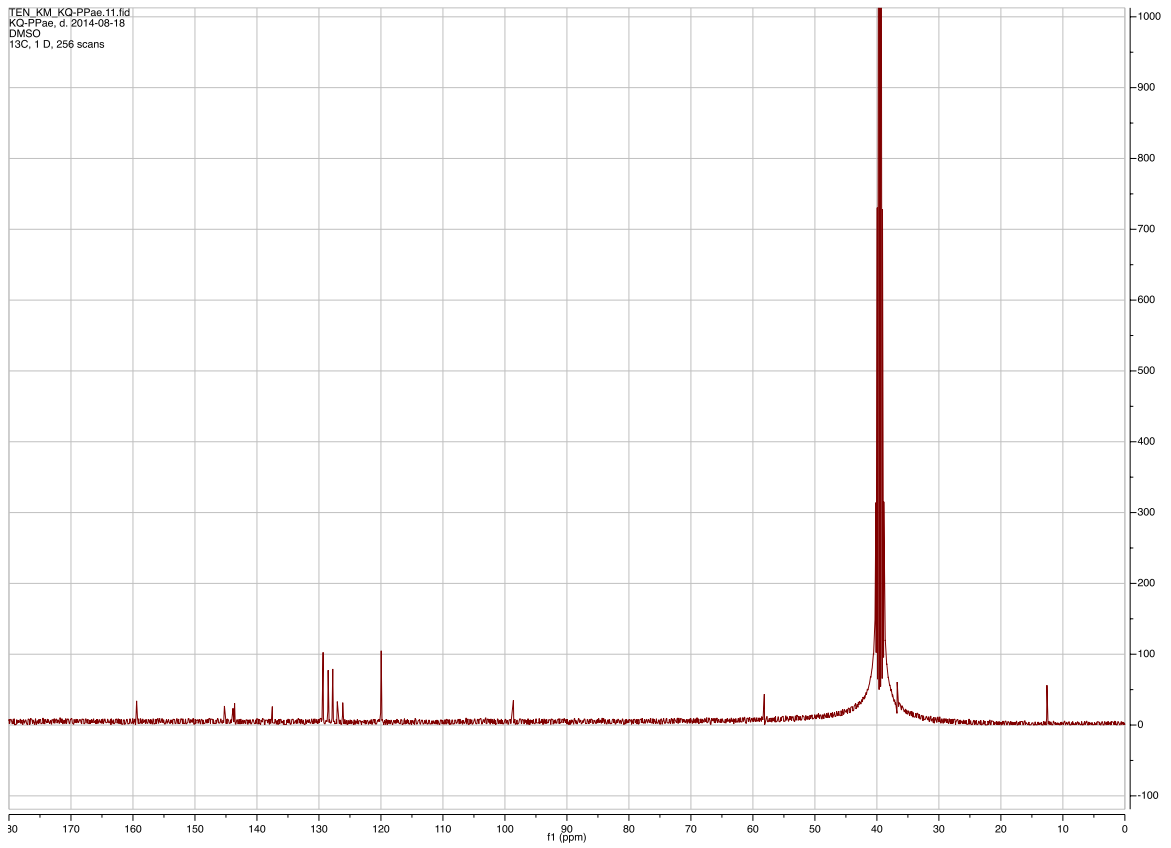

**6-amino-1-(4-chlorophenyl)-4-(2,5-dimethylphenyl)-3-methyl-1,4-dihydropyrano[2,3-c]pyrazole-5-carbonitrile (10ae)**

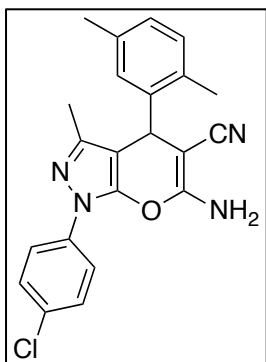

UPLC-UV:  $R_t = 2.32$ ;

UPLC-MS (ESI) calculated for  $C_{22}H_{20}ClN_4O$   $[M + H]^+$ :  $m/z = 391.1$  ( $^{35}Cl$ ),  $393.1$  ( $^{37}Cl$ ), found  $m/z = 391.2$  (100 %),  $393.2$  (32 %);

$^1H$  NMR (300 MHz,  $DMSO-d_6$ ):  $\delta = 7.84$  (d,  $J = 8.9$  Hz, 2H, ArNH),  $7.53$  (d,  $J = 8.9$  Hz, 2H, ArH),  $7.19$  (s, 2H, ArNH<sub>2</sub>),  $7.06$  (d,  $J = 7.7$  Hz, 1H, ArH),  $6.95$  (dd,  $J = 7.7, 1.8$  Hz, 1H, ArH),  $6.87$  (s, 1H, ArH),  $4.90$  (s, 1H, CHAr),  $2.32$  (s, 3H ArCH<sub>3</sub>),  $2.20$  (s, 3H ArCH<sub>3</sub>),  $1.70$  (s, 3H ArCH<sub>3</sub>).

3: UV Detector: TIC

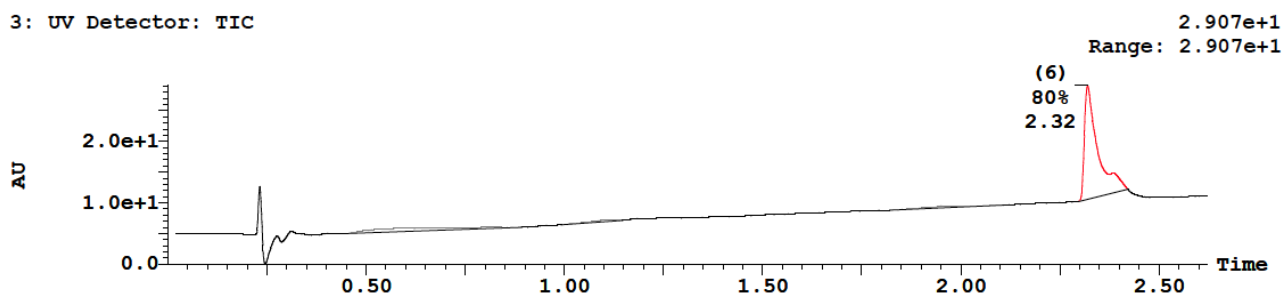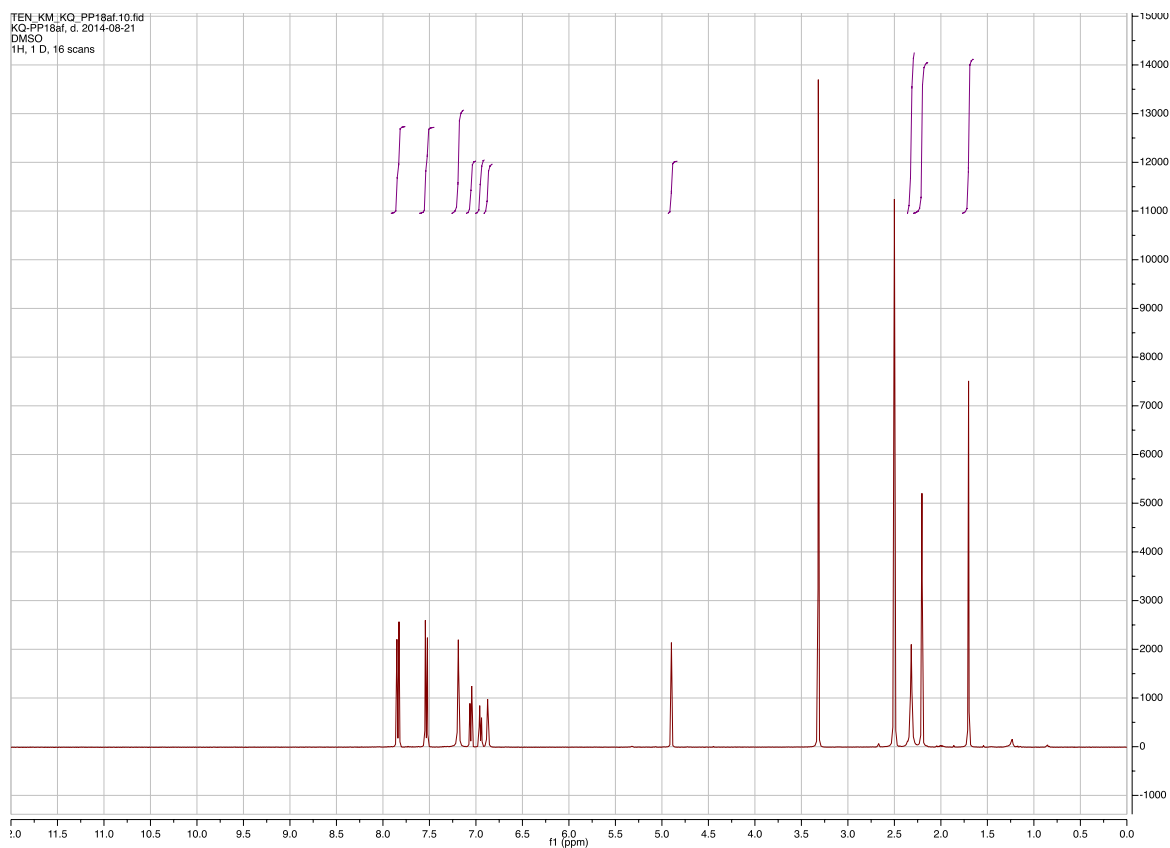

**6-amino-1-(4-chlorophenyl)-3-methyl-4-(*o*-tolyl)-1,4-dihydropyrano[2,3-*c*]pyrazole-5-carbonitrile (10af)**

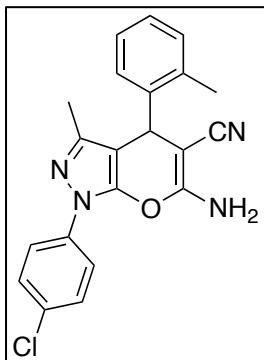

UPLC-UV: Rt = 2.21;

UPLC-MS (ESI) calculated for C<sub>21</sub>H<sub>18</sub>ClN<sub>4</sub>O [M + H]<sup>+</sup>: *m/z* = 377.1 (<sup>35</sup>Cl), 379.1 (<sup>37</sup>Cl), found *m/z* = 377.1 (100 %), 379.1 (32 %);

<sup>1</sup>H NMR (300 MHz, DMSO-*d*<sub>6</sub>): δ = 7.83 (d, *J* = 7.6 Hz, 2H, 2 × ArH), 7.53 (d, *J* = 7.7 Hz, 2H, 2 × ArH), 7.22-7.09 (m, 6H, 4 × ArH + ArNH<sub>2</sub>), 4.94 (s, 1H, CHAr), 2.37 (s, 3H ArCH<sub>3</sub>), 1.69 (s, 3H ArCH<sub>3</sub>);

IR (neat): 1384, 1511, 1662, 2224, 3192, 3332, 3453.

3: UV Detector: TIC

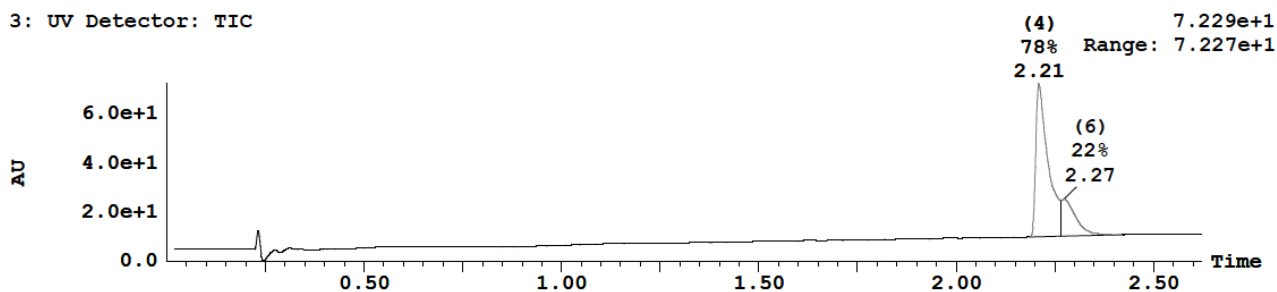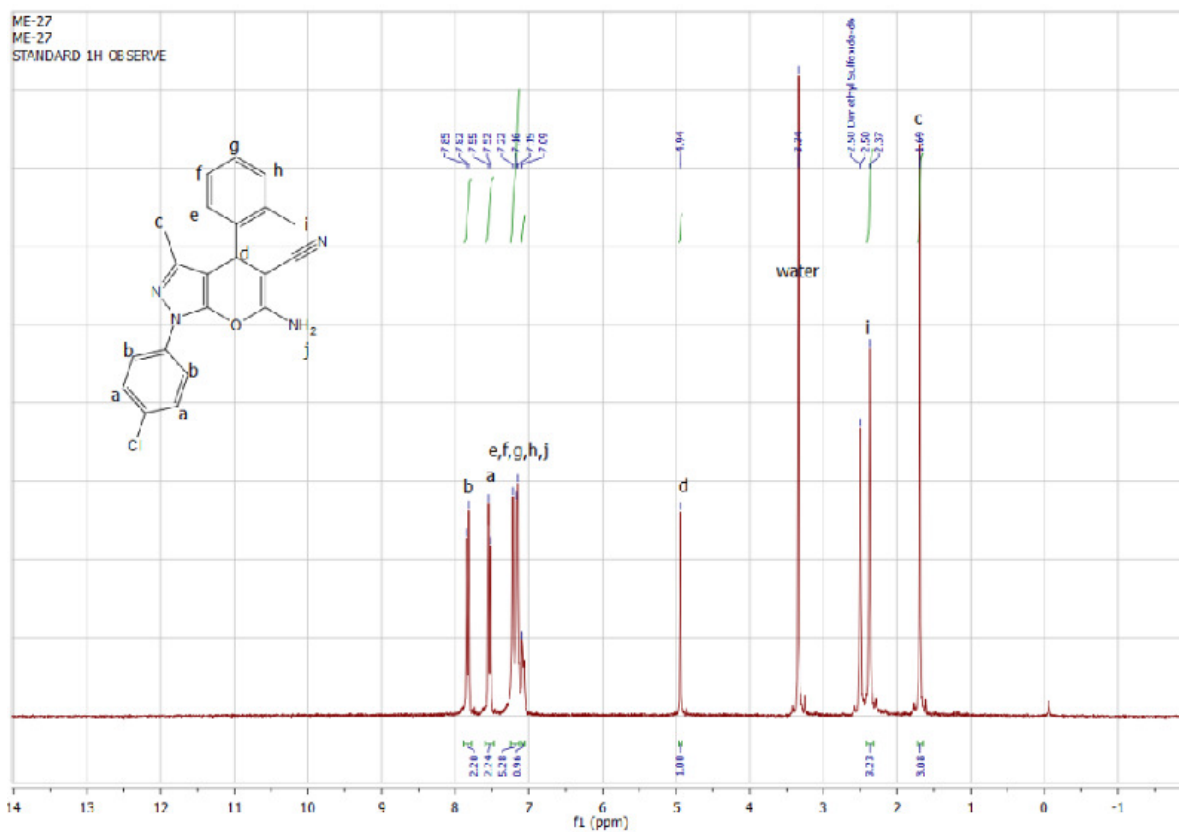

**6-amino-4-(2,4-dichlorophenyl)-3-methyl-1-phenyl-2,4-dihydropyrano[2,3-c]pyrazole-5-carbonitrile (10ag)**

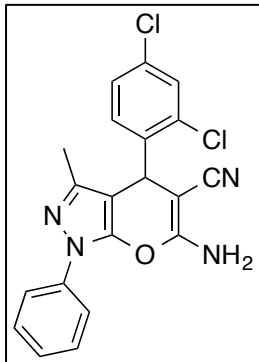

UPLC-UV:  $R_t = 2.38$

UPLC-MS (ESI) calculated for  $C_{20}H_{17}Cl_2N_4O [M + H]^+$ :  $m/z = 399.1$  ( $2 \times ^{35}Cl$ ),  $401.1$  ( $1 \times ^{37}Cl, 1 \times ^{37}Cl$ ), found  $m/z = 399.1$  (100 %),  $401.1$  (64 %);

$^1H$  NMR (300 MHz,  $DMSO-d_6$ ):  $\delta = 1.65$  (s, 3H),  $1.98$  (s, 3H),  $2.09$  (s, 3H),  $3.76$  (s, 3H),  $4.95$  (s, 1H),  $6.75-6.90$  (m, 2H),  $7.12$  (s, 2H),  $7.50$  (d, 2H),  $7.80$  (d, 2H).

**S2: Model set of compounds for development of binding mode model**

**S3: Test set of compounds for validation of binding mode model**
